# Supplementary material for: Revisiting the hydrological basis of the Budyko framework with the principle of hydrologically similar groups
Source: Copernicus journal article supplement (doi:10.5194/hess-27-1929-2023), 2023-05-17
Supplement: Supplementary file 1 [file hess-27-1929-2023-supplement.zip]

Archive with 4 entries (4 files):
- Supplement 1.pdf
- Supplement 3.pdf
- Supplement 2.pdf
- hess-27-1929-2023-supplement-title-page.pdf
