# Supplementary material for: Revisiting the hydrological basis of the Budyko framework with the principle of hydrologically similar groups
Source: Copernicus journal article supplement (doi:10.5194/hess-27-1929-2023), 2023-05-17
Supplement: Supplementary file 1 [file hess-27-1929-2023-supplement.zip › hess-27-1929-2023-supplement-title-page.pdf]

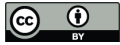

## *Supplement of*

# **Revisiting the hydrological basis of the Budyko framework with the principle of hydrologically similar groups**

**Yuchan Chen et al.**

*Correspondence to:* Xiuzhi Chen ([chenxzh73@mail.sysu.edu.cn](mailto:chenxzh73@mail.sysu.edu.cn))

- [hess-27-1929-2023-supplement-title-page.pdf](#)
- [Supplement 1.pdf](#)
- [Supplement 2.pdf](#)
- [Supplement 3.pdf](#)

The copyright of individual parts of the supplement might differ from the article licence.
