# Supplementary material for: Revisiting the hydrological basis of the Budyko framework with the principle of hydrologically similar groups
Source: Copernicus journal article supplement (doi:10.5194/hess-27-1929-2023), 2023-05-17
Supplement: Supplementary file 1 [file hess-27-1929-2023-supplement.zip › Supplement 1.pdf]

## Supplement 1: Descriptions of the globally observed watersheds

PRE-mean annual precipitation; PET-mean annual potential evapotranspiration; R-mean annual water yield; R/P-mean runoff coefficient

$$PET = \frac{0.408 \Delta (R_n - G) + \gamma \frac{900}{T + 273.16} U_2 (e_a - e_d)}{\Delta + \gamma(1 + 0.34 U_2)}$$

$R_n$  – net radiation at crop surface;  $G$  – soil heat flux;  $T$  – mean temperature at 2 m height;  $U_2$  – wind speed measured at 2 m height;  $(e_a - e_d)$  – vapour pressure deficit for measurement at 2 m height;  $\Delta$  – slope of the vapour pressure curve;  $\gamma$  – psychrometric constant

| No | Longitude | Latitude | Year      | Watershed               | Country   | PRE<br>(mm yr-1) | R<br>(mm yr-1) | R/P  | PET<br>(mm yr-1) | References                     |
|----|-----------|----------|-----------|-------------------------|-----------|------------------|----------------|------|------------------|--------------------------------|
| 1  | 36.99     | 15.07    | 1951      | Asinaro basin           | Italy     | 600              | 150            | 0.25 | 1839.7           | Aronica et al. (2002)          |
| 2  | 38.06     | 13.33    | 1951      | Oreto basin             | Italy     | 1030             | 450            | 0.44 | 1482.2           | Aronica et al. (2002)          |
| 3  | 116.31    | -34.47   | 1976      | March Road Catchment    | Australia | 824              | 36             | 0.04 | 1452.3           | Bari et al. (1996)             |
| 4  | 116.31    | -34.47   | 1980      | March Road Catchment    | Australia | 935              | 68             | 0.07 | 1405.3           | Bari et al. (1996)             |
| 5  | 116.31    | -34.47   | 1979      | March Road Catchment    | Australia | 879              | 64             | 0.07 | 1426.1           | Bari et al. (1996)             |
| 6  | 116.31    | -34.47   | 1981      | March Road Catchment    | Australia | 1230             | 166            | 0.13 | 1377.4           | Bari et al. (1996)             |
| 7  | 116.31    | -34.47   | 1978      | March Road Catchment    | Australia | 1082             | 172            | 0.16 | 1486.3           | Bari et al. (1996)             |
| 8  | 116.31    | -34.47   | 1987      | March Road Catchment    | Australia | 758              | 35             | 0.05 | 1427.3           | Bari et al. (1996)             |
| 9  | 116.31    | -34.47   | 1991      | March Road Catchment    | Australia | 1119             | 102            | 0.09 | 1422             | Bari et al. (1996)             |
| 10 | 116.31    | -34.47   | 1982      | March Road Catchment    | Australia | 720              | 61             | 0.08 | 1398.1           | Bari et al. (1996)             |
| 11 | 116.31    | -34.47   | 1988      | March Road Catchment    | Australia | 1377             | 337            | 0.24 | 1399             | Bari et al. (1996)             |
| 12 | 116.31    | -34.47   | 1989      | March Road Catchment    | Australia | 984              | 132            | 0.13 | 1413             | Bari et al. (1996)             |
| 13 | 116.31    | -34.47   | 1986      | March Road Catchment    | Australia | 730              | 97             | 0.13 | 1374.7           | Bari et al. (1996)             |
| 14 | 116.31    | -34.47   | 1990      | March Road Catchment    | Australia | 953              | 133            | 0.14 | 1369.9           | Bari et al. (1996)             |
| 15 | 116.31    | -34.47   | 1985      | March Road Catchment    | Australia | 992              | 149            | 0.15 | 1420.2           | Bari et al. (1996)             |
| 16 | 116.31    | -34.47   | 1983      | March Road Catchment    | Australia | 918              | 230            | 0.25 | 1426.8           | Bari et al. (1996)             |
| 17 | 116.31    | -34.47   | 1984      | March Road Catchment    | Australia | 1101             | 291            | 0.26 | 1403.5           | Bari et al. (1996)             |
| 18 | 117.41    | -34.88   | 2000      | Denmark catchment       | Australia | 625              | 25             | 0.04 | 1265             | Bari et al. (2011)             |
| 19 | 117.41    | -34.88   | 1990      | Denmark catchment       | Australia | 875              | 70             | 0.08 | 1218.8           | Bari et al. (2011)             |
| 20 | 117.41    | -34.88   | 1995      | Denmark catchment       | Australia | 375              | 30             | 0.08 | 1234.1           | Bari et al. (2011)             |
| 21 | 117.41    | -34.88   | 1980      | Denmark catchment       | Australia | 600              | 60             | 0.1  | 1254.1           | Bari et al. (2011)             |
| 22 | 117.41    | -34.88   | 2005      | Denmark catchment       | Australia | 790              | 80             | 0.1  | 1231.6           | Bari et al. (2011)             |
| 23 | 117.41    | -34.88   | 1975      | Denmark catchment       | Australia | 667              | 40             | 0.06 | 1279.4           | Bari et al. (2011)             |
| 24 | -120.56   | 36.38    | 1966-1990 | Cantua                  | USA       | 442              | 26             | 0.06 | 1169.94          | Bart and Hope (2010)           |
| 25 | -120.56   | 36.26    | 1966-1990 | Los Gatos               | USA       | 469              | 30             | 0.06 | 1169.94          | Bart and Hope (2010)           |
| 26 | -119.78   | 34.65    | 1966-1990 | Santa Cruz              | USA       | 807              | 125            | 0.15 | 1050.57          | Bart and Hope (2010)           |
| 27 | -119.35   | 34.61    | 1966-1990 | Sespe                   | USA       | 707              | 163            | 0.23 | 1089.11          | Bart and Hope (2010)           |
| 28 | -121.27   | 36.04    | 1966-1990 | San Antonio             | USA       | 580              | 181            | 0.31 | 1037.05          | Bart and Hope (2010)           |
| 29 | -121.27   | 35.9     | 1966-1990 | Nacimiento              | USA       | 560              | 406            | 0.73 | 1045.13          | Bart and Hope (2010)           |
| 30 | -119.07   | 34.46    | 1966-1990 | Santa Paula             | USA       | 680              | 295            | 0.43 | 1166.01          | Bart and Hope (2010)           |
| 31 | -120.53   | 35.28    | 1966-1990 | Lopez                   | USA       | 689              | 179            | 0.26 | 1105.98          | Bart and Hope (2010)           |
| 32 | -121.46   | 36.23    | 1966-1990 | Arroyo Seco             | USA       | 704              | 271            | 0.38 | 1037.05          | Bart and Hope (2010)           |
| 33 | -72.37    | 42.33    | 1966      | the Upper Cadwell Creek | USA       | 790              | 280            | 0.35 | 888              | Bent (2001)                    |
| 34 | -111.58   | 33.52    |           | Natural Draniages A     | USA       | 452              | 34             | 0.08 | 1898.02          | Best et al. (2003)             |
| 35 | -111.58   | 33.52    |           | Natural Draniages C     | USA       | 452              | 43             | 0.1  | 1898.02          | Best et al. (2003)             |
| 36 | -81.8     | 40.37    | 1939-1992 | Coshoccon 172           | USA       | 910              | 320            | 0.35 | 943.26           | Bonta (2001);Huntington (2003) |
| 37 | -79.1     | -2.85    | 1929      | MP1                     | Ecuador   | 939              | 175            | 0.19 | 1113.6           | Buytaert et al. (2007)         |
| 38 | -79.11    | -2.85    | 1929      | MR1                     | Ecuador   | 1028             | 506            | 0.49 | 1113.6           | Buytaert et al. (2007)         |
| 39 | -79.01    | -2.66    | 1904-1917 | HR1                     | Ecuador   | 1286             | 933            | 0.73 | 1109.31          | Buytaert et al. (2007)         |
| 40 | 128.75    | 45.81    | 1971-1987 | Mayi river              | China     | 633              | 192            | 0.3  | 717.68           | Cao et al. (1991)              |
| 41 | 127.35    | 45.3     | 1971-1987 | Ashen river             | China     | 638              | 206            | 0.32 | 796.08           | Cao et al. (1991)              |

| No | Longitude | Latitude | Year      | Watershed                       | Country      | PRE<br>(mm yr <sup>-1</sup> ) | R<br>(mm yr <sup>-1</sup> ) | R/P  | PET<br>(mm yr <sup>-1</sup> ) | References               |
|----|-----------|----------|-----------|---------------------------------|--------------|-------------------------------|-----------------------------|------|-------------------------------|--------------------------|
| 42 | 130.65    | 45.85    | 1971-1987 | Nianzi river                    | China        | 541                           | 113                         | 0.21 | 727.37                        | Cao et al. (1991)        |
| 43 | 130.52    | 46.03    | 1971-1987 | Woken river                     | China        | 510                           | 119                         | 0.23 | 707.29                        | Cao et al. (1991)        |
| 44 | 131.15    | 46.72    | 1971-1987 | Anbang river                    | China        | 535                           | 168                         | 0.31 | 686.74                        | Cao et al. (1991)        |
| 45 | 127.42    | 45.75    | 1971-1987 | Douzuizi Binxian                | China        | 536                           | 168                         | 0.31 | 792.89                        | Cao et al. (1991)        |
| 46 | 126.17    | 48.56    | 1971-1987 | Namoer Dedu                     | China        | 520                           | 69                          | 0.13 | 719.02                        | Cao et al. (1991)        |
| 47 | 125.46    | 47.86    | 1971-1987 | Wuyuerhe Beian                  | China        | 547                           | 145                         | 0.27 | 808.83                        | Cao et al. (1991)        |
| 48 | 125.31    | 47.89    | 1971-1987 | Wuyuerhe Yian                   | China        | 495                           | 85                          | 0.17 | 808.83                        | Cao et al. (1991)        |
| 49 | 127.35    | 45.3     | 1971-1987 | Ashen river                     | China        | 626                           | 148                         | 0.24 | 796.08                        | Cao et al. (1991)        |
| 50 | 99.9      | 38.45    | 1986      | Sidalong                        | China        | 639                           | 343                         | 0.54 | 766                           | Che et al. (1998)        |
| 51 | 99.9      | 38.45    | 1988      | Sidalong                        | China        | 694                           | 434                         | 0.63 | 759.8                         | Che et al. (1998)        |
| 52 | 99.9      | 38.45    | 1985      | Sidalong                        | China        | 555                           | 277                         | 0.5  | 777.9                         | Che et al. (1998)        |
| 53 | 99.9      | 38.45    | 1984      | Sidalong                        | China        | 602                           | 404                         | 0.67 | 765.6                         | Che et al. (1998)        |
| 54 | 99.9      | 38.45    | 1991      | Sidalong                        | China        | 491                           | 275                         | 0.56 | 787.2                         | Che et al. (1998)        |
| 55 | 99.9      | 38.45    | 1992      | Sidalong                        | China        | 604                           | 453                         | 0.75 | 759.3                         | Che et al. (1998)        |
| 56 | 99.9      | 38.45    | 1993      | Sidalong                        | China        | 667                           | 589                         | 0.88 | 744                           | Che et al. (1998)        |
| 57 | 99.9      | 38.45    | 1990      | Sidalong                        | China        | 573                           | 495                         | 0.86 | 775                           | Che et al. (1998)        |
| 58 | 99.9      | 38.45    | 1994      | Sidalong                        | China        | 520                           | 428                         | 0.82 | 787.5                         | Che et al. (1998)        |
| 59 | -108.58   | 32.96    | 1971-2008 | Gila at Gila                    | USA          | 597                           | 37                          | 0.06 | 1647.54                       | Claramonte et al. (2011) |
| 60 | -108.58   | 32.96    | 1971-2008 | Gila at Red Rock                | USA          | 486                           | 32                          | 0.07 | 1647.54                       | Claramonte et al. (2011) |
| 61 | -108.29   | 37.34    | 1971-2008 | Mancos                          | USA          | 480                           | 39                          | 0.08 | 1342.14                       | Claramonte et al. (2011) |
| 62 | -108.29   | 37.34    | 1971-2008 | Plata                           | USA          | 218                           | 20                          | 0.09 | 1342.14                       | Claramonte et al. (2011) |
| 63 | -106.05   | 36.31    | 1971-2008 | Ojo Caliente                    | USA          | 323                           | 60                          | 0.19 | 1367.55                       | Claramonte et al. (2011) |
| 64 | -108.5    | 37.47    | 1971-2008 | Dolores                         | USA          | 320                           | 67                          | 0.21 | 1472.01                       | Claramonte et al. (2011) |
| 65 | 145.03    | -36.78   | 1990      | Pine Creek catchment            | Australia    | 643                           | 83                          | 0.13 | 1217.4                        | Dawes et al. (2004)      |
| 66 | 145.03    | -36.78   | 1989      | Pine Creek catchment            | Australia    | 865                           | 215                         | 0.25 | 1178.5                        | Dawes et al. (2004)      |
| 67 | -118.52   | 37.3     | 1998      | Western Montane Riparian Forest | USA          | 350                           | 19                          | 0.05 | 1172.2                        | Disalvo and Hart (2002)  |
| 68 | -118.52   | 37.3     | 1996      | Western Montane Riparian Forest | USA          | 300                           | 17                          | 0.06 | 1230.1                        | Disalvo and Hart (2002)  |
| 69 | -118.52   | 37.3     | 1999      | Western Montane Riparian Forest | USA          | 120                           | 8                           | 0.07 | 1229.8                        | Disalvo and Hart (2002)  |
| 70 | -118.52   | 37.3     | 1997      | Western Montane Riparian Forest | USA          | 200                           | 15                          | 0.08 | 1202.2                        | Disalvo and Hart (2002)  |
| 71 | -118.52   | 37.3     | 1995      | Western Montane Riparian Forest | USA          | 440                           | 39                          | 0.09 | 1183.8                        | Disalvo and Hart (2002)  |
| 72 | 29.24     | -29      | 1980      | Cathedral Peak catchment VI     | South Africa | 1221                          | 668                         | 0.55 | 1237.2                        | Everson (2001)           |
| 73 | 29.24     | -29      | 1981      | Cathedral Peak catchment VI     | South Africa | 1067                          | 465                         | 0.44 | 1191.3                        | Everson (2001)           |
| 74 | 29.24     | -29      | 1982      | Cathedral Peak catchment VI     | South Africa | 909                           | 294                         | 0.32 | 1233.9                        | Everson (2001)           |
| 75 | 29.24     | -29      | 1983      | Cathedral Peak catchment VI     | South Africa | 1228                          | 735                         | 0.6  | 1229.6                        | Everson (2001)           |
| 76 | 29.24     | -29      | 1984      | Cathedral Peak catchment VI     | South Africa | 1025                          | 411                         | 0.4  | 1224                          | Everson (2001)           |
| 77 | 29.24     | -29      | 1985      | Cathedral Peak catchment VI     | South Africa | 1306                          | 487                         | 0.37 | 1249.4                        | Everson (2001)           |
| 78 | 29.24     | -29      | 1986      | Cathedral Peak catchment VI     | South Africa | 1578                          | 686                         | 0.43 | 1228                          | Everson (2001)           |

| No  | Longitude | Latitude | Year | Watershed                                         | Country      | PRE<br>(mm yr-1) | R<br>(mm yr-1) | R/P  | PET<br>(mm yr-1) | References              |
|-----|-----------|----------|------|---------------------------------------------------|--------------|------------------|----------------|------|------------------|-------------------------|
| 79  | 29.24     | -29      | 1987 | Cathedral Peak catchment VI                       | South Africa | 1524             | 745            | 0.49 | 1191             | Everson (2001)          |
| 80  | 29.24     | -29      | 1989 | Cathedral Peak catchment VI                       | South Africa | 1008             | 293            | 0.29 | 1177.7           | Everson (2001)          |
| 81  | 29.24     | -29      | 1991 | Cathedral Peak catchment VI                       | South Africa | 1484             | 736            | 0.5  | 1206.1           | Everson (2001)          |
| 82  | 29.24     | -29      | 1992 | Cathedral Peak catchment VI                       | South Africa | 858              | 314            | 0.37 | 1299.6           | Everson (2001)          |
| 83  | -8.73     | 42.45    | 1990 | Castrove in Eucalyptus globulus Labill. Watershed | Spain        | 1712.31          | 1272.54        | 0.74 | 1036.5           | Fernandez et al. (2006) |
| 84  | -8.73     | 42.45    | 1991 | Castrove in Eucalyptus globulus Labill. Watershed | Spain        | 2307.78          | 1843.79        | 0.8  | 997.9            | Fernandez et al. (2006) |
| 85  | -8.73     | 42.45    | 1992 | Castrove in Eucalyptus globulus Labill. Watershed | Spain        | 1608.16          | 747.1          | 0.46 | 976.3            | Fernandez et al. (2006) |
| 86  | -8.73     | 42.45    | 1997 | Castrove in Eucalyptus globulus Labill. Watershed | Spain        | 1764.39          | 1415.61        | 0.8  | 993.6            | Fernandez et al. (2006) |
| 87  | -8.73     | 42.45    | 1996 | Castrove in Eucalyptus globulus Labill. Watershed | Spain        | 2350.8           | 1546.15        | 0.66 | 1006.6           | Fernandez et al. (2006) |
| 88  | -8.73     | 42.45    | 1995 | Castrove in Eucalyptus globulus Labill. Watershed | Spain        | 2122.12          | 1617.22        | 0.76 | 1061.8           | Fernandez et al. (2006) |
| 89  | -8.73     | 42.45    | 1993 | Castrove in Eucalyptus globulus Labill. Watershed | Spain        | 1782.5           | 1345.64        | 0.75 | 929.8            | Fernandez et al. (2006) |
| 90  | -8.73     | 42.45    | 1994 | Castrove in Eucalyptus globulus Labill. Watershed | Spain        | 2622.49          | 2136.52        | 0.81 | 979.6            | Fernandez et al. (2006) |
| 91  | -48.63    | -23.03   | 1995 | Tinga catchment                                   | Brazil       | 1493             | 458            | 0.31 | 1106.1           | Ferraz et al. (2013)    |
| 92  | -48.63    | -23.03   | 1994 | Tinga catchment                                   | Brazil       | 1402             | 423            | 0.3  | 1105.8           | Ferraz et al. (2013)    |
| 93  | -48.63    | -23.03   | 1993 | Tinga catchment                                   | Brazil       | 1528             | 649            | 0.42 | 1108.8           | Ferraz et al. (2013)    |
| 94  | -48.63    | -23.03   | 1997 | Tinga catchment                                   | Brazil       | 1967             | 930            | 0.47 | 1081.8           | Ferraz et al. (2013)    |
| 95  | -48.63    | -23.03   | 2000 | Tinga catchment                                   | Brazil       | 1392             | 391            | 0.28 | 1109.4           | Ferraz et al. (2013)    |
| 96  | -48.63    | -23.03   | 1999 | Tinga catchment                                   | Brazil       | 1141             | 384            | 0.34 | 1090.4           | Ferraz et al. (2013)    |
| 97  | -48.63    | -23.03   | 1998 | Tinga catchment                                   | Brazil       | 1333             | 635            | 0.48 | 1076             | Ferraz et al. (2013)    |
| 98  | 8.49      | 50.75    | 1982 | Aar in Lahn Dill Bergland                         | Germany      | 823              | 388            | 0.47 | 681              | Fohrer et al. (2005)    |
| 99  | 8.49      | 50.75    | 1983 | Aar in Lahn Dill Bergland                         | Germany      | 815              | 397            | 0.49 | 666.1            | Fohrer et al. (2005)    |
| 100 | 8.49      | 50.75    | 1984 | Aar in Lahn Dill Bergland                         | Germany      | 814              | 400            | 0.49 | 592.5            | Fohrer et al. (2005)    |
| 101 | 8.49      | 50.75    | 1987 | Aar in Lahn Dill Bergland                         | Germany      | 813              | 403            | 0.5  | 579.9            | Fohrer et al. (2005)    |
| 102 | 8.49      | 50.75    | 1986 | Aar in Lahn Dill Bergland                         | Germany      | 813              | 406            | 0.5  | 656.4            | Fohrer et al. (2005)    |
| 103 | 8.49      | 50.75    | 1985 | Aar in Lahn Dill Bergland                         | Germany      | 801              | 408            | 0.51 | 604.5            | Fohrer et al. (2005)    |
| 104 | -45.02    | -23.22   | 1983 | Catchment A in the Serra do Mar                   | Brazil       | 2584             | 1828           | 0.71 | 896.3            | Fujieda et al. (1997)   |
| 105 | -45.02    | -23.22   | 1985 | Catchment A in the Serra do Mar                   | Brazil       | 3113             | 2722           | 0.87 | 905.3            | Fujieda et al. (1997)   |
| 106 | -45.02    | -23.22   | 1990 | Catchment A in the Serra do Mar                   | Brazil       | 1867             | 1199           | 0.64 | 889.9            | Fujieda et al. (1997)   |
| 107 | -45.02    | -23.22   | 1992 | Catchment A in the Serra do Mar                   | Brazil       | 1877             | 1234           | 0.66 | 917.6            | Fujieda et al. (1997)   |
| 108 | -45.02    | -23.22   | 1991 | Catchment A in the Serra do Mar                   | Brazil       | 2260             | 1778           | 0.79 | 896.4            | Fujieda et al. (1997)   |
| 109 | -45.02    | -23.22   | 1984 | Catchment A in the Serra do Mar                   | Brazil       | 1852             | 1346           | 0.73 | 902              | Fujieda et al. (1997)   |
| 110 | -45.02    | -23.22   | 1989 | Catchment B in the Serra do Mar                   | Brazil       | 2166             | 1514           | 0.7  | 880.9            | Fujieda et al. (1997)   |

| No  | Longitude | Latitude | Year      | Watershed                                | Country        | PRE<br>(mm yr <sup>-1</sup> ) | R<br>(mm yr <sup>-1</sup> ) | R/P  | PET<br>(mm yr <sup>-1</sup> ) | References                     |
|-----|-----------|----------|-----------|------------------------------------------|----------------|-------------------------------|-----------------------------|------|-------------------------------|--------------------------------|
| 111 | -45.02    | -23.22   | 1988      | Catchment B in the Serra do Mar          | Brazil         | 2000                          | 1468                        | 0.73 | 887.5                         | Fujieda et al. (1997)          |
| 112 | -45.02    | -23.22   | 1991      | Catchment B in the Serra do Mar          | Brazil         | 2070                          | 1608                        | 0.78 | 896.4                         | Fujieda et al. (1997)          |
| 113 | -45.02    | -23.22   | 1990      | Catchment B in the Serra do Mar          | Brazil         | 1756                          | 1195                        | 0.68 | 889.9                         | Fujieda et al. (1997)          |
| 114 | -45.02    | -23.22   | 1992      | Catchment B in the Serra do Mar          | Brazil         | 1715                          | 1154                        | 0.67 | 917.6                         | Fujieda et al. (1997)          |
| 115 | 86.24     | 44.44    | 1960-1973 | Mulei river                              | China          | 434                           | 85                          | 0.2  | 1105.78                       | Gao et al. (2000)              |
| 116 | 87.35     | 44.01    | 1960-1973 | Toutun river                             | China          | 396                           | 274                         | 0.69 | 1154.35                       | Gao et al. (2000)              |
| 117 | 89.82     | 43.5     | 1960-1973 | Kaiken river                             | China          | 608                           | 260                         | 0.43 | 1056.31                       | Gao et al. (2000)              |
| 118 | 81.18     | 43.93    | 1960-1973 | Piliqing Piliqing                        | China          | 432                           | 225                         | 0.52 | 919.91                        | Gao et al. (2000)              |
| 119 | 87.17     | 43.27    | 1960-1973 | Wulumuqi Yingxiongqiao                   | China          | 477                           | 264                         | 0.55 | 941.95                        | Gao et al. (2000)              |
| 120 | 86.6      | 43.8     | 1960-1973 | Hutubi river                             | China          | 389                           | 230                         | 0.59 | 1010.32                       | Gao et al. (2000)              |
| 121 | 85.96     | 43.97    | 1960-1973 | Manasi river                             | China          | 349                           | 251                         | 0.72 | 951.49                        | Gao et al. (2000)              |
| 122 | 81.68     | 43.97    | 1985-1989 | Hongnigou                                | China          | 348                           | 251                         | 0.72 | 903.13                        | Gao et al. (2000)              |
| 123 | 81.68     | 44.17    | 1985-1989 | Bayingou                                 | China          | 244                           | 194                         | 0.8  | 793.28                        | Gao et al. (2000)              |
| 124 | 170.16    | -44.06   | 1970-1993 | Maryburn                                 | New Zealand    | 920                           | 334.16                      | 0.36 | 805.54                        | Griffiths et al. (1997)        |
| 125 | 169.2     | -44.98   | 1970-1995 | Marewhenua                               | New Zealand    | 950                           | 495.81                      | 0.52 | 763.95                        | Griffiths et al. (1997)        |
| 126 | 170.49    | -44.73   | 1964-1995 | Hakataramea                              | New Zealand    | 690                           | 212.93                      | 0.31 | 741.96                        | Griffiths et al. (1997)        |
| 127 | -2.63     | 52.36    | avg       | Severn river                             | United Kingdom | 924                           | 490                         | 0.53 | 539.44                        | Hannaford and Buys (2012)      |
| 128 | -1.81     | 52.79    | avg       | Derwent river                            | United Kingdom | 1007                          | 634                         | 0.63 | 566.55                        | Hannaford and Buys (2012)      |
| 129 | -2.2      | 52.05    | avg       | Avon river                               | United Kingdom | 668                           | 347                         | 0.52 | 561.02                        | Hannaford and Buys (2012)      |
| 130 | -1        | 52.11    | avg       | Ouse river                               | United Kingdom | 654                           | 347                         | 0.53 | 559.53                        | Hannaford and Buys (2012)      |
| 131 | -0.57     | 51.77    | avg       | Lee river                                | United Kingdom | 643                           | 379                         | 0.59 | 579.63                        | Hannaford and Buys (2012)      |
| 132 | -122.6    | 42.69    |           | Coyote Creek 1                           | USA            | 1230                          | 627                         | 0.51 | 975.38                        | Harr (1976);Harr et al. (1979) |
| 133 | -122.6    | 42.69    |           | Coyote Creek 2                           | USA            | 1230                          | 630                         | 0.51 | 975.38                        | Harr (1976);Harr et al. (1979) |
| 134 | -122.6    | 42.69    |           | Coyote Creek 3                           | USA            | 1230                          | 630                         | 0.51 | 975.38                        | Harr (1976);Harr et al. (1979) |
| 135 | -122.6    | 42.69    | 1971      | Coyote Creek Experimental watersheds CC1 | USA            | 1557                          | 822                         | 0.53 | 935.2                         | Harr et al. (1979)             |
| 136 | -122.6    | 42.69    | 1972      | Coyote Creek Experimental watersheds CC1 | USA            | 1533                          | 1077                        | 0.7  | 996                           | Harr et al. (1979)             |
| 137 | -122.6    | 42.69    | 1973      | Coyote Creek Experimental watersheds CC1 | USA            | 895                           | 354                         | 0.4  | 1041                          | Harr et al. (1979)             |
| 138 | -122.6    | 42.69    | 1974      | Coyote Creek Experimental watersheds CC1 | USA            | 1565                          | 1130                        | 0.72 | 995.2                         | Harr et al. (1979)             |
| 139 | -122.6    | 42.69    | 1975      | Coyote Creek Experimental watersheds CC1 | USA            | 1226                          | 772                         | 0.63 | 919.1                         | Harr et al. (1979)             |
| 140 | -122.6    | 42.69    | 1976      | Coyote Creek Experimental watersheds CC1 | USA            | 1458                          | 829                         | 0.57 | 940.1                         | Harr et al. (1979)             |
| 141 | -122.6    | 42.69    | 1971      | Coyote Creek Experimental watersheds CC2 | USA            | 1557                          | 760                         | 0.49 | 935.2                         | Harr et al. (1979)             |
| 142 | -122.6    | 42.69    | 1972      | Coyote Creek Experimental watersheds CC2 | USA            | 1533                          | 1005                        | 0.66 | 996                           | Harr et al. (1979)             |

| No  | Longitude | Latitude | Year      | Watershed                                | Country | PRE<br>(mm yr-1) | R<br>(mm yr-1) | R/P  | PET<br>(mm yr-1) | References                  |
|-----|-----------|----------|-----------|------------------------------------------|---------|------------------|----------------|------|------------------|-----------------------------|
| 143 | -122.6    | 42.69    | 1973      | Coyote Creek Experimental watersheds CC2 | USA     | 895              | 344            | 0.38 | 1041             | Harr et al. (1979)          |
| 144 | -122.6    | 42.69    | 1974      | Coyote Creek Experimental watersheds CC2 | USA     | 1565             | 1051           | 0.67 | 995.2            | Harr et al. (1979)          |
| 145 | -122.6    | 42.69    | 1975      | Coyote Creek Experimental watersheds CC2 | USA     | 1226             | 695            | 0.57 | 919.1            | Harr et al. (1979)          |
| 146 | -122.6    | 42.69    | 1976      | Coyote Creek Experimental watersheds CC2 | USA     | 1458             | 749            | 0.51 | 940.1            | Harr et al. (1979)          |
| 147 | -122.6    | 42.69    | 1971      | Coyote Creek Experimental watersheds CC3 | USA     | 1557             | 824            | 0.53 | 935.2            | Harr et al. (1979)          |
| 148 | -122.6    | 42.69    | 1972      | Coyote Creek Experimental watersheds CC3 | USA     | 1533             | 1285           | 0.84 | 996              | Harr et al. (1979)          |
| 149 | -122.6    | 42.69    | 1973      | Coyote Creek Experimental watersheds CC3 | USA     | 895              | 542            | 0.61 | 1041             | Harr et al. (1979)          |
| 150 | -122.6    | 42.69    | 1974      | Coyote Creek Experimental watersheds CC3 | USA     | 1565             | 1251           | 0.8  | 995.2            | Harr et al. (1979)          |
| 151 | -122.6    | 42.69    | 1975      | Coyote Creek Experimental watersheds CC3 | USA     | 1226             | 827            | 0.67 | 919.1            | Harr et al. (1979)          |
| 152 | -122.6    | 42.69    | 1976      | Coyote Creek Experimental watersheds CC3 | USA     | 1458             | 920            | 0.63 | 940.1            | Harr et al. (1979)          |
| 153 | -122.6    | 42.69    | 1971      | Coyote Creek Experimental watersheds CC4 | USA     | 1557             | 891            | 0.57 | 935.2            | Harr et al. (1979)          |
| 154 | -122.6    | 42.69    | 1972      | Coyote Creek Experimental watersheds CC4 | USA     | 1533             | 1070           | 0.7  | 996              | Harr et al. (1979)          |
| 155 | -122.6    | 42.69    | 1973      | Coyote Creek Experimental watersheds CC4 | USA     | 895              | 289            | 0.32 | 1041             | Harr et al. (1979)          |
| 156 | -122.6    | 42.69    | 1974      | Coyote Creek Experimental watersheds CC4 | USA     | 1565             | 1065           | 0.68 | 995.2            | Harr et al. (1979)          |
| 157 | -122.6    | 42.69    | 1975      | Coyote Creek Experimental watersheds CC4 | USA     | 1226             | 689            | 0.56 | 919.1            | Harr et al. (1979)          |
| 158 | -122.6    | 42.69    | 1976      | Coyote Creek Experimental watersheds CC4 | USA     | 1458             | 758            | 0.52 | 940.1            | Harr et al. (1979)          |
| 159 | -122.18   | 44.23    | 1973      | HJA 6 Andrews Experimental Forest        | USA     | 1600             | 720            | 0.45 | 900.5            | Harr et al. (1982)          |
| 160 | -122.18   | 44.23    | 1970      | HJA 6 Andrews Experimental Forest        | USA     | 1990             | 1250           | 0.63 | 879.9            | Harr et al. (1982)          |
| 161 | -122.18   | 44.23    | 1964      | HJA 6 Andrews Experimental Forest        | USA     | 2040             | 1320           | 0.65 | 770.4            | Harr et al. (1982)          |
| 162 | -122.18   | 44.23    | 1967      | HJA 6 Andrews Experimental Forest        | USA     | 1880             | 1170           | 0.62 | 880.3            | Harr et al. (1982)          |
| 163 | -122.18   | 44.23    | 1966      | HJA 6 Andrews Experimental Forest        | USA     | 1720             | 1040           | 0.6  | 846.5            | Harr et al. (1982)          |
| 164 | -122.18   | 44.23    | 1972      | HJA 6 Andrews Experimental Forest        | USA     | 2810             | 2310           | 0.82 | 877.7            | Harr et al. (1982)          |
| 165 | -122.18   | 44.23    | 1969      | HJA 6 Andrews Experimental Forest        | USA     | 2310             | 1740           | 0.75 | 835              | Harr et al. (1982)          |
| 166 | -122.18   | 44.23    | 1974      | HJA 6 Andrews Experimental Forest        | USA     | 2900             | 2530           | 0.87 | 876.4            | Harr et al. (1982)          |
| 167 | -122.18   | 44.23    | 1977      | HJA 6 Andrews Experimental Forest        | USA     | 1250             | 730            | 0.58 | 833.6            | Harr et al. (1982)          |
| 168 | -122.18   | 44.23    | 1979      | HJA 6 Andrews Experimental Forest        | USA     | 1750             | 1560           | 0.89 | 862.3            | Harr et al. (1982)          |
| 169 | -123.97   | 44.46    | 1959-1965 | Needle Branch in Alsea River Basin       | USA     | 2483             | 1886           | 0.76 | 748.77           | Harris (1973); Harris(1977) |

| No  | Longitude | Latitude | Year      | Watershed                                | Country   | PRE<br>(mm yr <sup>-1</sup> ) | R<br>(mm yr <sup>-1</sup> ) | R/P  | PET<br>(mm yr <sup>-1</sup> ) | References                  |
|-----|-----------|----------|-----------|------------------------------------------|-----------|-------------------------------|-----------------------------|------|-------------------------------|-----------------------------|
| 170 | -123.97   | 44.46    | 1959-1965 | Flynn Creek in Alsea River Basin         | USA       | 2483                          | 1974                        | 0.8  | 748.77                        | Harris (1973); Harris(1977) |
| 171 | -123.97   | 44.46    | 1959-1965 | Deer Creek in Alsea River Basin          | USA       | 2474                          | 1906                        | 0.77 | 748.77                        | Harris (1977)               |
| 172 | -120.21   | 47.68    | 1970      | McCree                                   | USA       | 579                           | 112                         | 0.19 | 870.6                         | Hewey (1973);Hewey (1980)   |
| 173 | -120.21   | 47.68    | 1970      | Burns                                    | USA       | 597                           | 156                         | 0.26 | 870.6                         | Hewey (1973);Hewey (1980)   |
| 174 | 146.62    | -36.81   | 2009      | Clem Creek in Cropper Creek              | Australia | 1301                          | 500                         | 0.38 | 1101.4                        | Smith et al. (2011)         |
| 175 | 146.62    | -36.81   | 2008      | Clem Creek in Cropper Creek              | Australia | 1107                          | 480                         | 0.43 | 1071.4                        | Smith et al. (2011)         |
| 176 | 146.62    | -36.81   | 1980      | Clem Creek in Cropper Creek              | Australia | 1476                          | 797                         | 0.54 | 1094.3                        | Hopmans and Bren (2007)     |
| 177 | 146.62    | -36.81   | 2001      | Clem Creek in Cropper Creek              | Australia | 1107                          | 377                         | 0.34 | 1037                          | Hopmans and Bren (2007)     |
| 178 | 107.73    | 36.05    |           | Caijiaomiao Gansu                        | China     | 530                           | 32                          | 0.06 | 904.96                        | Hu (2000)                   |
| 179 | 104       | 35.75    |           | Hejiapo Gansu                            | China     | 489                           | 30                          | 0.06 | 797.6                         | Hu (2000)                   |
| 180 | 106.91    | 35.48    |           | Yaofenggou Gansu                         | China     | 511                           | 40                          | 0.08 | 813.61                        | Hu (2000)                   |
| 181 | 104       | 35.75    |           | Yaodian Gansu                            | China     | 531                           | 47                          | 0.09 | 797.6                         | Hu (2000)                   |
| 182 | 104       | 35.75    |           | Yuzhong                                  | China     | 514                           | 103                         | 0.2  | 797.6                         | Hu (2000)                   |
| 183 | 106.65    | 35.22    |           | Huating                                  | China     | 723                           | 207                         | 0.29 | 813.61                        | Hu (2000)                   |
| 184 | -84.17    | 33.62    | 1986-1994 | Panola                                   | USA       | 1240                          | 360                         | 0.29 | 1216.53                       | Huntington (2003)           |
| 185 | 102.35    | 37.97    | 2000      | Xiying in Shiyang River basin            | China     | 520                           | 247                         | 0.48 | 890.7                         | Huo et al. (2012)           |
| 186 | 102.73    | 38.08    | 2000      | Zamu in Shiyang River basin              | China     | 559                           | 270                         | 0.48 | 931                           | Huo et al. (2012)           |
| 187 | 103       | 37.5     | 2000      | Gulang in Shiyang River basin            | China     | 470                           | 68                          | 0.14 | 814.8                         | Huo et al. (2012)           |
| 188 | 97.94     | 40.02    | 2000      | Huangyang in Shiyang River basin         | China     | 482                           | 157                         | 0.33 | 1038.3                        | Huo et al. (2012)           |
| 189 | 100.09    | 40.23    | 2000      | Jinta in Shiyang River basin             | China     | 460                           | 155                         | 0.34 | 1041.5                        | Huo et al. (2012)           |
| 190 | 28.65     | 63.87    | 1983-2000 | Valipuro in Sotkamo                      | Finland   | 690                           | 358                         | 0.52 | 458.92                        | Ide et al. (2013)           |
| 191 | 28.65     | 63.87    | 1971-1983 | Valipuro in Sotkamo                      | Finland   | 608                           | 333                         | 0.55 | 463.21                        | Ide et al. (2013)           |
| 192 | 28.65     | 63.87    | 1983-2000 | Kivipuro in Sotkamo                      | Finland   | 690                           | 345                         | 0.5  | 458.92                        | Ide et al. (2013)           |
| 193 | 28.65     | 63.87    | 1971-1983 | Kivipuro in Sotkamo                      | Finland   | 608                           | 350                         | 0.58 | 463.21                        | Ide et al. (2013)           |
| 194 | -71.95    | -39.28   | 1999      | Los Ulmos 1 catchments                   | Chile     | 444                           | 133                         | 0.3  | 1092.5                        | Iroume et al. (2005)        |
| 195 | -70.54    | -33.45   | 2000      | La Reina                                 | Chile     | 466                           | 214                         | 0.46 | 1089.4                        | Iroume et al. (2005)        |
| 196 | -71.95    | -39.28   | 2000      | Los Ulmos 1 catchments                   | Chile     | 461                           | 250                         | 0.54 | 1016.8                        | Iroume et al. (2005)        |
| 197 | -71.95    | -39.28   | 2000      | Los Ulmos 2 catchments                   | Chile     | 461                           | 270                         | 0.59 | 1016.8                        | Iroume et al. (2005)        |
| 198 | -70.54    | -33.45   | 1999      | La Reina                                 | Chile     | 388                           | 68                          | 0.18 | 1084.3                        | Iroume et al. (2005)        |
| 199 | -71.95    | -39.28   | 1999      | Los Ulmos 2 catchments                   | Chile     | 444                           | 139                         | 0.31 | 1092.5                        | Iroume et al. (2005)        |
| 200 | 108.1     | 28.28    | 1996-1999 | Dejiang                                  | China     | 1090                          | 497                         | 0.46 | 804.73                        | Jin (2001)                  |
| 201 | 108.1     | 28.28    | 1988-1990 | Dejiang                                  | China     | 1141                          | 446                         | 0.39 | 811.05                        | Jin (2001)                  |
| 202 | 108.1     | 28.28    | 1991-1995 | Dejiang                                  | China     | 1124                          | 466                         | 0.41 | 799.43                        | Jin (2001)                  |
| 203 | 111.21    | 37.26    | 1981-1990 | Wannianpao                               | China     | 333                           | 1                           | 0    | 981.49                        | Jin (2002)                  |
| 204 | 113.04    | 36.73    | 1981-1990 | Nanguan                                  | China     | 438                           | 4                           | 0.01 | 1020.09                       | Jin (2002)                  |
| 205 | 112.23    | 38.64    | 1981-1990 | Gedonggou                                | China     | 350                           | 3                           | 0.01 | 955.54                        | Jin (2002)                  |
| 206 | 111.11    | 36.6     | 1981-1990 | Chashang                                 | China     | 375                           | 5                           | 0.01 | 990.02                        | Jin (2002)                  |
| 207 | 111.28    | 35.67    | 1981-1990 | Diantou                                  | China     | 560                           | 11                          | 0.02 | 1010.21                       | Jin (2002)                  |
| 208 | 111.23    | 35.61    | 1981-1990 | Beizhangdian                             | China     | 455                           | 5                           | 0.01 | 1010.21                       | Jin (2002)                  |
| 209 | 110.66    | 34.84    | 1981-1990 | Damiaio                                  | China     | 592                           | 8                           | 0.01 | 966.16                        | Jin (2002)                  |
| 210 | 110.66    | 34.84    | 1981-1990 | Siping                                   | China     | 407                           | 6                           | 0.01 | 966.16                        | Jin (2002)                  |
| 211 | 110.66    | 34.84    | 1981-1990 | Lengkou                                  | China     | 580                           | 12                          | 0.02 | 966.16                        | Jin (2002)                  |
| 212 | -122.61   | 45.39    | 1963-1970 | Coyote 1                                 | USA       | 1230                          | 627                         | 0.51 | 837.04                        | Jones (2000)                |
| 213 | -90.58    | 43.7     | 1971-2000 | Coon Creek and Kickapoo River Watersheds | USA       | 828                           | 252                         | 0.3  | 851.21                        | Juckem et al. (2008)        |

| No  | Longitude | Latitude | Year      | Watershed                                | Country   | PRE<br>(mm yr <sup>-1</sup> ) | R<br>(mm yr <sup>-1</sup> ) | R/P  | PET<br>(mm yr <sup>-1</sup> ) | References                                                 |
|-----|-----------|----------|-----------|------------------------------------------|-----------|-------------------------------|-----------------------------|------|-------------------------------|------------------------------------------------------------|
| 214 | -90.58    | 43.7     | 1941-1970 | Coon Creek and Kickapoo River Watersheds | USA       | 783                           | 218                         | 0.28 | 840.32                        | Juckem et al. (2008)                                       |
| 215 | 10.87     | 50.82    | 1981-1994 | Gera                                     | Germany   | 786                           | 368                         | 0.47 | 623.55                        | Kloocking and Haberlandt (2002)                            |
| 216 | 11.39     | 50.93    | 1981-1994 | Ilm                                      | Germany   | 765                           | 347                         | 0.45 | 636.39                        | Kloocking and Haberlandt (2002)                            |
| 217 | 10.49     | 51.19    | 1981-1994 | Nagelstedt of Unstrut                    | Germany   | 691                           | 301                         | 0.44 | 605.78                        | Kloocking and Haberlandt (2002)                            |
| 218 | 10.91     | 51.5     | 1981-1994 | Sundhausen of Helme                      | Germany   | 798                           | 392                         | 0.49 | 612.92                        | Kloocking and Haberlandt (2002)                            |
| 219 | 10.49     | 51.42    | 1981-1994 | Wipper                                   | Germany   | 707                           | 321                         | 0.45 | 605.78                        | Kloocking and Haberlandt (2002)                            |
| 220 | 12.47     | 53.14    | 1981-1994 | Weida                                    | Germany   | 661                           | 301                         | 0.46 | 662.41                        | Kloocking and Haberlandt (2002)                            |
| 221 | 12.47     | 53.14    | 1981-1994 | Dosse                                    | Germany   | 639                           | 289                         | 0.45 | 662.41                        | Kloocking and Haberlandt (2002)                            |
| 222 | 12.45     | 50.8     | 1981-1994 | PleiBe                                   | Germany   | 670                           | 323                         | 0.48 | 659.43                        | Kloocking and Haberlandt (2002)                            |
| 223 | 12.37     | 50.5     | 1981-1994 | WeieB                                    | Germany   | 760                           | 440                         | 0.58 | 642.75                        | Kloocking and Haberlandt (2002)                            |
| 224 | 13.4      | 52.69    | 1981-1994 | Tegeler                                  | Germany   | 626                           | 180                         | 0.29 | 703.78                        | Kloocking and Haberlandt (2002)                            |
| 225 | 14.24     | 52.1     | 1981-1994 | Spree                                    | Germany   | 611                           | 218                         | 0.36 | 715.14                        | Kloocking and Haberlandt (2002)                            |
| 226 | 10.82     | 51.81    | 1981-1994 | Holtemme                                 | Germany   | 832                           | 438                         | 0.53 | 612.92                        | Kloocking and Haberlandt (2002)                            |
| 227 | 13        | 52.17    | 1981-1994 | Nuthe                                    | Germany   | 578                           | 268                         | 0.46 | 726.75                        | Kloocking and Haberlandt (2002)                            |
| 228 | 132.84    | 33.97    | 1971      | Sarukawa Ichigo sawa                     | Japan     | 3234                          | 2513                        | 0.78 | 899.9                         | Komatsu et al. (2007)                                      |
| 229 | 132.84    | 33.97    | 1970      | Sarukawa Ichigo sawa                     | Japan     | 2861                          | 2159                        | 0.75 | 884                           | Komatsu et al. (2007)                                      |
| 230 | 132.84    | 33.97    | 1969      | Sarukawa Ichigo sawa                     | Japan     | 2378                          | 1581                        | 0.66 | 954.2                         | Komatsu et al. (2007)                                      |
| 231 | 132.84    | 33.97    | 1967      | Sarukawa Ichigo sawa                     | Japan     | 2120                          | 1415                        | 0.67 | 942.1                         | Komatsu et al. (2007)                                      |
| 232 | 132.84    | 33.97    | 1968      | Sarukawa Ichigo sawa                     | Japan     | 2227                          | 1663                        | 0.75 | 893.9                         | Komatsu et al. (2007)                                      |
| 233 | 9.35      | 56.41    | 1994      | Oak stand in Central Jutland             | Denmark   | 1004                          | 532                         | 0.53 | 569.3                         | Ladekarl et al. (2005)                                     |
| 234 | 9.35      | 56.41    | 1993      | Oak stand in Central Jutland             | Denmark   | 959                           | 536                         | 0.56 | 500.9                         | Ladekarl et al. (2005)                                     |
| 235 | 9.35      | 56.41    | 1992      | Oak stand in Central Jutland             | Denmark   | 888                           | 448                         | 0.5  | 628.9                         | Ladekarl et al. (2005)                                     |
| 236 | 9.35      | 56.41    | 1996      | Oak stand in Central Jutland             | Denmark   | 578                           | 197                         | 0.34 | 516.3                         | Ladekarl et al. (2005)                                     |
| 237 | 9.35      | 56.41    | 1995      | Oak stand in Central Jutland             | Denmark   | 770                           | 314                         | 0.41 | 559.5                         | Ladekarl et al. (2005)                                     |
| 238 | 149.78    | -24.8    | 1965-1983 | C1 in Brigalow Research Station          | Australia | 699                           | 20                          | 0.03 | 1465.63                       | Lawrence and Sinclair (1986); Lawrence and Thorburn (1989) |
| 239 | 149.78    | -24.8    | 1965-1983 | C3 in Brigalow Research Station          | Australia | 695                           | 32                          | 0.05 | 1465.63                       | Lawrence and Sinclair (1986); Lawrence and Thorburn (1989) |
| 240 | 149.78    | -24.8    | 1965-1983 | C2 in Brigalow Research Station          | Australia | 686                           | 39                          | 0.06 | 1465.63                       | Lawrence and Sinclair (1986); Lawrence and Thorburn (1989) |
| 241 | 115.05    | 41.21    | 1960-1967 | Xigou Chongli                            | China     | 418                           | 35                          | 0.08 | 994.94                        | Li and Guo (1986)                                          |
| 242 | 115.12    | 41.12    | 1960-1967 | Donggou Chongli                          | China     | 484                           | 44                          | 0.09 | 994.94                        | Li and Guo (1986)                                          |
| 243 | 107.95    | 35.62    |           | Malianhe Heshuichuan Yangjiagou          | China     | 527                           | 5                           | 0.01 | 891.32                        | Li and Tu (1983)                                           |
| 244 | 107.95    | 35.62    |           | Malianhe heshuichuan Dongzhuanggou       | China     | 526                           | 10                          | 0.02 | 891.32                        | Li and Tu (1983)                                           |
| 245 | 110.93    | 37.59    |           | Linjiaping                               | China     | 448                           | 53                          | 0.12 | 1020.31                       | Li and Tu (1983)                                           |
| 246 | 108.2     | 36.04    | 1959-1962 | Wangjia Gansu                            | China     | 639                           | 10                          | 0.02 | 907.03                        | Li and Xu (2006)                                           |
| 247 | 108.2     | 36.04    | 1959-1962 | Nanxiao Gansu                            | China     | 500                           | 12                          | 0.02 | 907.03                        | Li and Xu (2006)                                           |
| 248 | 109.98    | 36.35    | 1951-1963 | Fengchuan Linzhen                        | China     | 555                           | 18                          | 0.03 | 961.98                        | Liu and Zhong( 1978;                                       |
| 249 | 109.13    | 35.89    | 1951-1963 | Beiluo Zahngcunyi                        | China     | 568                           | 19                          | 0.03 | 947.43                        | Liu and Zhong( 1978;                                       |
| 250 | 109.76    | 35.84    | 1951-1963 | Xiang Hongmiaogou                        | China     | 636                           | 29                          | 0.05 | 980.24                        | Liu and Zhong( 1978;                                       |
| 251 | 109.47    | 35.75    | 1951-1963 | Beiluo Liujahe                           | China     | 475                           | 29                          | 0.06 | 947.43                        | Liu and Zhong( 1978;                                       |
| 252 | 109.98    | 36.35    | 1951-1963 | Xiang Anminggou                          | China     | 624                           | 37                          | 0.06 | 961.98                        | Liu and Zhong( 1978;                                       |
| 253 | 109.98    | 36.35    | 1951-1963 | Qingjian Zichang                         | China     | 509                           | 34                          | 0.07 | 961.98                        | Liu and Zhong( 1978;                                       |

| No  | Longitude | Latitude | Year      | Watershed                                     | Country  | PRE<br>(mm yr <sup>-1</sup> ) | R<br>(mm yr <sup>-1</sup> ) | R/P  | PET<br>(mm yr <sup>-1</sup> ) | References          |
|-----|-----------|----------|-----------|-----------------------------------------------|----------|-------------------------------|-----------------------------|------|-------------------------------|---------------------|
| 254 | 101.27    | 21.92    | 1993-1994 | Xishuangbanna subtropical forest station      | China    | 1557                          | 755                         | 0.48 | 1090.8                        | Liu et al. (1999)   |
| 255 | 110.62    | 36.67    | 2001-2005 | Beipo                                         | China    | 356.8                         | 2                           | 0.01 | 1030.05                       | Liu et al. (2004)   |
| 256 | 110.62    | 36.67    | 2001-2005 | Liugou                                        | China    | 360                           | 5                           | 0.01 | 1030.05                       | Liu et al. (2004)   |
| 257 | 110.62    | 36.67    | 2002-2005 | Liujiaao                                      | China    | 368.75                        | 6                           | 0.02 | 1022.53                       | Liu et al. (2004)   |
| 258 | 110.62    | 36.67    | 2002-2005 | Jingou                                        | China    | 367.39                        | 17                          | 0.05 | 1022.53                       | Liu et al. (2004)   |
| 259 | 110.62    | 36.67    | 2001-2005 | Nanbeiyao                                     | China    | 358.6                         | 28                          | 0.08 | 1030.05                       | Liu et al. (2004)   |
| 260 | 31.69     | -20.1    | 1983-1993 | Turgwe                                        | Zimbabwe | 670                           | 129                         | 0.19 | 1312.78                       | Lorup et al. (1998) |
| 261 | 31.69     | -20.1    | 1967-1975 | Turgwe                                        | Zimbabwe | 857                           | 254                         | 0.3  | 1270.91                       | Lorup et al. (1998) |
| 262 | 30.9      | -19.8    | 1977-1990 | Mshagashi                                     | Zimbabwe | 650                           | 62                          | 0.1  | 1318.23                       | Lorup et al. (1998) |
| 263 | 30.9      | -19.8    | 1957-1965 | Mshagashi                                     | Zimbabwe | 661                           | 64                          | 0.1  | 1303.86                       | Lorup et al. (1998) |
| 264 | 31.37     | -18.02   | 1977-1990 | Nyatsime                                      | Zimbabwe | 796                           | 106                         | 0.13 | 1251.99                       | Lorup et al. (1998) |
| 265 | 31.37     | -18.02   | 1957-1964 | Nyatsime                                      | Zimbabwe | 792                           | 141                         | 0.18 | 1221.1                        | Lorup et al. (1998) |
| 266 | 30.9      | -19.8    | 1944-1955 | Mshagashi                                     | Zimbabwe | 691                           | 117                         | 0.17 | 1323.65                       | Lorup et al. (1998) |
| 267 | 31.03     | -18.65   | 1977-1990 | Ngezi                                         | Zimbabwe | 740                           | 43                          | 0.06 | 1233.95                       | Lorup et al. (1998) |
| 268 | 31.03     | -18.65   | 1957-1964 | Ngezi                                         | Zimbabwe | 718                           | 50                          | 0.07 | 1210.03                       | Lorup et al. (1998) |
| 269 | 31.75     | -19.9    | 1983-1994 | Roswa                                         | Zimbabwe | 627                           | 48                          | 0.08 | 1273.6                        | Lorup et al. (1998) |
| 270 | 31.06     | -19.77   | 1960-1968 | Popotekwe                                     | Zimbabwe | 649                           | 69                          | 0.11 | 1243.09                       | Lorup et al. (1998) |
| 271 | 31.06     | -19.77   | 1976-1991 | Popotekwe                                     | Zimbabwe | 673                           | 78                          | 0.12 | 1269.43                       | Lorup et al. (1998) |
| 272 | 31.75     | -19.9    | 1967-1975 | Roswa                                         | Zimbabwe | 713                           | 119                         | 0.17 | 1237.05                       | Lorup et al. (1998) |
| 273 | -77.95    | 41.11    | 1967-1977 | Leading Ridge experiments                     | USA      | 1060                          | 440                         | 0.42 | 811.77                        | Lynch et al. (1980) |
| 274 | 123.18    | 41.45    | 1961-2006 | Dadongshanbao in Hun Tai River basin          | China    | 693                           | 191                         | 0.28 | 928.97                        | Ma et al. (2008)    |
| 275 | 123.41    | 41.78    | 1961-2006 | Shenyang in Hun Tai River basin               | China    | 661                           | 182                         | 0.28 | 937.64                        | Ma et al. (2008)    |
| 276 | 123.83    | 41.89    | 1961-2006 | Fushun in Hun Tai River basin                 | China    | 720                           | 228                         | 0.32 | 928.85                        | Ma et al. (2008)    |
| 277 | 123.5     | 41.24    | 1961-2006 | Shenwo in Hun Tai River basin                 | China    | 744                           | 312                         | 0.42 | 900.2                         | Ma et al. (2008)    |
| 278 | 101.93    | 37.98    | 1950-2005 | Dongda of Shiyang River basin                 | China    | 500                           | 185                         | 0.37 | 810.53                        | Ma et al. (2008)    |
| 279 | 102.23    | 37.83    | 1950-2005 | Xiying                                        | China    | 520                           | 249                         | 0.48 | 865.1                         | Ma et al. (2008)    |
| 280 | 103.35    | 37.3     | 1950-2005 | Dajing                                        | China    | 441                           | 32                          | 0.07 | 795.96                        | Ma et al. (2008)    |
| 281 | 102.85    | 37.35    | 1950-2005 | Gulang                                        | China    | 470                           | 71                          | 0.15 | 834.49                        | Ma et al. (2008)    |
| 282 | 102.83    | 37.35    | 1950-2005 | Huangyang of Shiyang River basin              | China    | 482                           | 153                         | 0.32 | 834.49                        | Ma et al. (2008)    |
| 283 | 102.6     | 37.71    | 1950-2005 | Jinta of Shiyang River basin                  | China    | 460                           | 154                         | 0.33 | 868.54                        | Ma et al. (2008)    |
| 284 | 101.38    | 38.05    | 1950-2005 | Xida of Shiyang River basin                   | China    | 501                           | 199                         | 0.4  | 891.1                         | Ma et al. (2008)    |
| 285 | 102.72    | 37.52    | 1950-2005 | Zamu of Shiyang River basin                   | China    | 559                           | 268                         | 0.48 | 868.54                        | Ma et al. (2008)    |
| 286 | 117       | 40.5     | 2000      | The upstream catchment of the Miyun Reservoir | China    | 476                           | 13                          | 0.03 | 1130.5                        | Ma et al. (2010)    |
| 287 | 117       | 40.5     | 2005      | The upstream catchment of the Miyun Reservoir | China    | 476                           | 25                          | 0.05 | 1124.8                        | Ma et al. (2010)    |
| 288 | 117       | 40.5     | 1980      | The upstream catchment of the Miyun Reservoir | China    | 506                           | 38                          | 0.08 | 1017.9                        | Ma et al. (2010)    |
| 289 | 117       | 40.5     | 1985      | The upstream catchment of the Miyun Reservoir | China    | 476                           | 44                          | 0.09 | 1002.5                        | Ma et al. (2010)    |
| 290 | 117       | 40.5     | 1975      | The upstream catchment of the Miyun Reservoir | China    | 506                           | 57                          | 0.11 | 1057.2                        | Ma et al. (2010)    |
| 291 | 117       | 40.5     | 1965      | The upstream catchment of the Miyun Reservoir | China    | 506                           | 63                          | 0.12 | 1103.9                        | Ma et al. (2010)    |

| No  | Longitude | Latitude | Year      | Watershed                                     | Country   | PRE<br>(mm yr-1) | R<br>(mm yr-1) | R/P  | PET<br>(mm yr-1) | References             |
|-----|-----------|----------|-----------|-----------------------------------------------|-----------|------------------|----------------|------|------------------|------------------------|
| 292 | 117       | 40.5     | 1970      | The upstream catchment of the Miyun Reservoir | China     | 506              | 65             | 0.13 | 980.7            | Ma et al. (2010)       |
| 293 | 117       | 40.5     | 1990      | The upstream catchment of the Miyun Reservoir | China     | 476              | 70             | 0.15 | 1030.8           | Ma et al. (2010)       |
| 294 | 117       | 40.5     | 1995      | The upstream catchment of the Miyun Reservoir | China     | 476              | 76             | 0.16 | 1087.4           | Ma et al. (2010)       |
| 295 | 117       | 40.5     | 1960      | The upstream catchment of the Miyun Reservoir | China     | 506              | 82             | 0.16 | 1037.7           | Ma et al. (2010)       |
| 296 | 117       | 40.5     | 1955      | The upstream catchment of the Miyun Reservoir | China     | 506              | 234            | 0.46 | 1063.4           | Ma et al. (2010)       |
| 297 | 137.18    | 35.03    | 2001      | Toyota Foresthills model forest               | Japan     | 1288             | 593            | 0.46 | 976              | Maeda et al. (2006)    |
| 298 | 137.18    | 35.03    | 2002      | Toyota Foresthills model forest               | Japan     | 1164             | 470            | 0.4  | 969.8            | Maeda et al. (2006)    |
| 299 | 33.82     | -11.73   | 1965      | Luchelemu catchment in Viphya plateau         | Malawi    | 903              | 61             | 0.07 | 1265.9           | Mwendera (1994)        |
| 300 | 33.82     | -11.73   | 1964      | Luchelemu catchment in Viphya plateau         | Malawi    | 903              | 64             | 0.07 | 1290.1           | Mwendera (1994)        |
| 301 | 33.82     | -11.73   | 1962      | Luchelemu catchment in Viphya plateau         | Malawi    | 903              | 64             | 0.07 | 1235             | Mwendera (1994)        |
| 302 | 33.82     | -11.73   | 1963      | Luchelemu catchment in Viphya plateau         | Malawi    | 903              | 83             | 0.09 | 1248.6           | Mwendera (1994)        |
| 303 | 140.25    | 38.92    | 1940-1947 | Kamabuchi No. 2                               | Japan     | 2617             | 2075           | 0.79 | 699.89           | Nakano (1971)          |
| 304 | 139.02    | 36.85    | 1940-1947 | Takaragawa Shozawa                            | Japan     | 2153             | 1783           | 0.83 | 650.13           | Nakano (1971)          |
| 305 | 12.5      | 46.36    | 1989-2004 | Rienza at Monguelfo                           | Italy     | 980              | 621            | 0.63 | 522.3            | Norbiato et al (2009)  |
| 306 | 11.86     | 46.77    | 1989-2004 | Gadera at Mantana                             | Italy     | 963              | 623            | 0.65 | 473.91           | Norbiato et al (2009)  |
| 307 | 12.02     | 46.69    | 1989-2004 | San Vigilio                                   | Italy     | 900              | 560            | 0.62 | 461.61           | Norbiato et al (2009)  |
| 308 | 12.38     | 46.59    | 1989-2004 | Anterselva at Bagni                           | Italy     | 1050             | 780            | 0.74 | 461.61           | Norbiato et al (2009)  |
| 309 | 12.5      | 46.36    | 1989-2004 | Cordevole at Vizza                            | Italy     | 1218             | 866            | 0.71 | 522.3            | Norbiato et al (2009)  |
| 310 | 12.09     | 46.92    | 1989-2004 | Riva at Seghe                                 | Italy     | 1659             | 1283           | 0.77 | 461.61           | Norbiato et al (2009)  |
| 311 | 12.02     | 46.84    | 1989-2004 | Aurino at San                                 | Italy     | 1351             | 1033           | 0.76 | 461.61           | Norbiato et al (2009)  |
| 312 | 11.6      | 46.35    | 1989-2004 | Cordevole at Saviner                          | Italy     | 1120             | 770            | 0.69 | 487.3            | Norbiato et al (2009)  |
| 313 | 12.38     | 46.58    | 1989-2004 | Casies at Colle                               | Italy     | 993              | 669            | 0.67 | 461.61           | Norbiato et al (2009)  |
| 314 | 11.21     | 46.87    | 1989-2004 | Ridanna at Vipiteno                           | Italy     | 1375             | 1019           | 0.74 | 515.41           | Norbiato et al (2009)  |
| 315 | -68.1     | 44.87    | 1989-2000 | West Bear Brook ME                            | USA       | 1400             | 960            | 0.69 | 685.29           | Norton et al. (1999)   |
| 316 | -68.1     | 44.87    | 1989-2000 | West Bear Brook ME                            | USA       | 1400             | 970            | 0.69 | 685.29           | Norton et al. (1999)   |
| 317 | -67.02    | 46.28    | 1972-1999 | Narrows Mountain Brook NB CA                  | Canada    | 1320             | 780            | 0.59 | 623.58           | Noseworthy (2001)      |
| 318 | 145.56    | -37.66   | 1972-1975 | Monda 4                                       | Australia | 1730             | 854            | 0.49 | 1194.13          | Langford et al. (1979) |
| 319 | 145.6     | -37.66   | 1972-1975 | Myrtle 2                                      | Australia | 1590             | 852            | 0.54 | 1194.13          | Langford et al. (1979) |
| 320 | 145.61    | -37.65   | 1972-1975 | Myrtle 1                                      | Australia | 1622             | 678            | 0.42 | 1194.13          | Langford et al. (1979) |
| 321 | 116.83    | -33.09   | 1966-1969 | Williams                                      | Australia | 500              | 52             | 0.1  | 1440.4           | Peak and Hurle (1973)  |
| 322 | 116.82    | -32.74   | 1966-1970 | Hotham                                        | Australia | 730              | 30             | 0.04 | 1503.93          | Peak and Hurle (1973)  |
| 323 | 116.13    | -32.75   | 1954-1970 | Davies                                        | Australia | 1370             | 150            | 0.11 | 1548.68          | Peak and Hurle (1973)  |
| 324 | 116.22    | -31.54   | 1965-1969 | Julimar                                       | Australia | 660              | 33             | 0.05 | 1595.2           | Peak and Hurle (1973)  |
| 325 | 116.81    | -32.48   | 1967-1970 | Dale                                          | Australia | 490              | 37             | 0.08 | 1537.07          | Peak and Hurle (1973)  |
| 326 | 116.24    | -31.79   | 1956-1968 | Wooroloo                                      | Australia | 880              | 58             | 0.07 | 1628.79          | Peak and Hurle (1973)  |
| 327 | 116.13    | -31.48   | 1963-1969 | Brockman                                      | Australia | 910              | 65             | 0.07 | 1627.22          | Peak and Hurle (1973)  |
| 328 | 116.64    | -33.35   | 1967-1968 | Collie east                                   | Australia | 820              | 63             | 0.08 | 1479.1           | Peak and Hurle (1973)  |
| 329 | 116.11    | -32.56   | 1939-1970 | North Dandalup                                | Australia | 1330             | 190            | 0.14 | 1542.84          | Peak and Hurle (1973)  |

| No  | Longitude | Latitude | Year      | Watershed                              | Country        | PRE<br>(mm yr-1) | R<br>(mm yr-1) | R/P  | PET<br>(mm yr-1) | References                               |
|-----|-----------|----------|-----------|----------------------------------------|----------------|------------------|----------------|------|------------------|------------------------------------------|
| 330 | 116.21    | -33.19   | 1969-1968 | Harris                                 | Australia      | 870              | 120            | 0.14 | 1520.64          | Peak and Hurle (1973)                    |
| 331 | 116.13    | -32.27   | 1966-1970 | More Seldom seen                       | Australia      | 1150             | 220            | 0.19 | 1579.8           | Peak and Hurle (1973)                    |
| 332 | 116.09    | -32.28   | 1966-1970 | Seldom seen                            | Australia      | 1170             | 290            | 0.25 | 1579.8           | Peak and Hurle (1973)                    |
| 333 | 35.28     | -0.37    | 1956-1960 | Kericho Sambret                        | Kenya          | 1905             | 789            | 0.41 | 1444.13          | Pereira(1962);Pereira(1964)              |
| 334 | 36.73     | -0.77    | 1956-1960 | Kimakia A                              | Kenya          | 2014             | 1104           | 0.55 | 1027.68          | Pereira(1962);Pereira(1964)              |
| 335 | 150.08    | -33.39   | 1967-1993 | L 6 Lidsdale NSW                       | Australia      | 755              | 88             | 0.12 | 1299.62          | Putuhena and Cordery (2000)              |
| 336 | 150.08    | -33.39   | 1967-1993 | L 5 Lidsdale NSW                       | Australia      | 755              | 107            | 0.14 | 1299.62          | Putuhena and Cordery (2000)              |
| 337 | -112.32   | 33.9     | 1955-1964 | West Fork in Castle Creek              | USA            | 686              | 51             | 0.07 | 2005.78          | Rich (1972); Baker (1999)                |
| 338 | -112.18   | 34.19    | 1955-1964 | East Creek in Castle Creek             | USA            | 686              | 76             | 0.11 | 1729.22          | Rich (1972); Baker (1999)                |
| 339 | -2.58     | 55.23    | 1982-1986 | Coalburn Kielder forest                | United Kingdom | 1445             | 1025           | 0.71 | 459.43           | Robison (1998)                           |
| 340 | -2.58     | 55.23    | 1977-1981 | Coalburn Kielder forest                | United Kingdom | 1421             | 995            | 0.7  | 457.33           | Robison (1998)                           |
| 341 | -2.58     | 55.23    | 1987-1991 | Coalburn Kielder forest                | United Kingdom | 1415             | 998            | 0.71 | 476.88           | Robison (1998)                           |
| 342 | -2.58     | 55.23    | 1972-1976 | Coalburn Kielder forest                | United Kingdom | 1149             | 766            | 0.67 | 472.5            | Robison (1998)                           |
| 343 | -122.18   | 44.23    | 1974      | H.J. Andrews Experimental Forest 7     | USA            | 2150             | 1290           | 0.6  | 876.4            | Rothacher (1970);Harr (1976);Harr (1979) |
| 344 | -122.18   | 44.23    | 1974      | H.J. Andrews Experimental Forest 6     | USA            | 2150             | 1290           | 0.6  | 876.4            | Rothacher (1970);Harr (1976);Harr (1979) |
| 345 | -122.18   | 44.23    | 1974      | H.J. Andrews Experimental Forest 6     | USA            | 2150             | 1415           | 0.66 | 876.4            | Rothacher (1970);Harr (1976);Harr (1979) |
| 346 | -122.18   | 44.23    | 1974      | H.J. Andrews Experimental Forest 7     | USA            | 2150             | 1490           | 0.69 | 876.4            | Rothacher (1970);Harr (1976);Harr (1979) |
| 347 | -122.18   | 44.23    | 1975      | H.J. Andrews Experimental Forest 10    | USA            | 2330             | 1650           | 0.71 | 824.5            | Rothacher (1970);Harr (1976);Harr (1979) |
| 348 | -122.18   | 44.23    | 1975      | H.J. Andrews Experimental Forest 10    | USA            | 2330             | 1845           | 0.79 | 824.5            | Rothacher (1970);Harr (1976);Harr (1979) |
| 349 | -117.81   | 34.11    | 1958      | Monroe Canyon                          | USA            | 648              | 64             | 0.1  | 1278.3           | Rowe (1963)                              |
| 350 | -117.81   | 34.11    | 1958      | Monroe Canyon                          | USA            | 648              | 69             | 0.11 | 1278.3           | Rowe (1963)                              |
| 351 | 76.62     | 11.47    | 1968-1981 | Glenmorgan Ootacamund A                | India          | 1535             | 469            | 0.31 | 1394.68          | Samraj et al. (1988)                     |
| 352 | 29.24     | -29      | 1949-1993 | Cathedral Peak cath 5                  | South Africa   | 1400             | 672.7          | 0.48 | 1212.42          | Scott et al. (2000)                      |
| 353 | 29.23     | -29      | 1951-1960 | Cathedral Peak cath 5                  | South Africa   | 1565             | 683.2          | 0.44 | 1209.96          | Scott et al. (2000)                      |
| 354 | 29.23     | -29      | 1961-1981 | Cathedral Peak cath 5                  | South Africa   | 1317             | 518.2          | 0.39 | 1207.63          | Scott et al. (2000)                      |
| 355 | 29.23     | -29      | 1949-1952 | Cathedral Peak cath 5                  | South Africa   | 1508             | 806.9          | 0.54 | 1239             | Scott et al. (2000)                      |
| 356 | 29.23     | -29      | 1953-1993 | Cathedral Peak cath 5                  | South Africa   | 1419             | 527.1          | 0.37 | 1209.73          | Scott et al. (2000)                      |
| 357 | 18.96     | -33.98   | 1971-1976 | the Tierkloof Catchment in Jonkershoek | South Africa   | 1315             | 716            | 0.54 | 1431.46          | Scott and Prinsloo (2008)                |
| 358 | 18.96     | -33.98   | 1967-1971 | the Tierkloof Catchment in Jonkershoek | South Africa   | 1252             | 686            | 0.55 | 1374.38          | Scott and Prinsloo (2008)                |
| 359 | 18.96     | -33.98   | 1997-1999 | the Tierkloof Catchment in Jonkershoek | South Africa   | 1269             | 738            | 0.58 | 1415.1           | Scott and Prinsloo (2008)                |
| 360 | 18.96     | -33.98   | 1992-1996 | the Tierkloof Catchment in Jonkershoek | South Africa   | 1382             | 928            | 0.67 | 1426.75          | Scott and Prinsloo (2008)                |
| 361 | 18.96     | -33.98   | 1987-1991 | the Tierkloof Catchment in Jonkershoek | South Africa   | 1345             | 886            | 0.66 | 1418.75          | Scott and Prinsloo (2008)                |

| No  | Longitude | Latitude | Year      | Watershed                              | Country      | PRE<br>(mm yr-1) | R<br>(mm yr-1) | R/P  | PET<br>(mm yr-1) | References                |
|-----|-----------|----------|-----------|----------------------------------------|--------------|------------------|----------------|------|------------------|---------------------------|
| 362 | 18.96     | -33.98   | 1982-1986 | the Tierkloof Catchment in Jonkershoek | South Africa | 1310             | 848            | 0.65 | 1424.08          | Scott and Prinsloo (2008) |
| 363 | 18.96     | -33.98   | 1962-1966 | the Tierkloof Catchment in Jonkershoek | South Africa | 1285             | 831            | 0.65 | 1387.53          | Scott and Prinsloo (2008) |
| 364 | 18.96     | -33.98   | 1957-1961 | the Tierkloof Catchment in Jonkershoek | South Africa | 1343             | 920            | 0.69 | 1441.8           | Scott and Prinsloo (2008) |
| 365 | 18.96     | -33.98   | 1977-1981 | the Tierkloof Catchment in Jonkershoek | South Africa | 1236             | 810            | 0.66 | 1421.23          | Scott and Prinsloo (2008) |
| 366 | 18.96     | -33.98   | 2000-2003 | the Tierkloof Catchment in Jonkershoek | South Africa | 1179             | 813            | 0.69 | 1428.3           | Scott and Prinsloo (2008) |
| 367 | 18.96     | -33.98   | 1942-1956 | the Tierkloof Catchment in Jonkershoek | South Africa | 1352             | 1074           | 0.79 | 1404.86          | Scott and Prinsloo (2008) |
| 368 | 18.96     | -33.98   | 1938-1956 | Tierkloof in Jonkershoek               | South Africa | 1319             | 1076.5         | 0.82 | 1405.87          | Scott et al. (2000)       |
| 369 | 18.96     | -33.98   | 1958-1998 | Tierkloof in Jonkershoek               | South Africa | 1319             | 826.5          | 0.63 | 1412.73          | Scott et al. (2000)       |
| 370 | 18.95     | -33.96   | 1947-1964 | Lambrechts Bos B in Jonkershoek        | South Africa | 1145             | 517.8          | 0.45 | 1413.58          | Scott et al.(2000)        |
| 371 | 18.95     | -33.96   | 1965-1998 | Lambrechts Bos B in Jonkershoek        | South Africa | 1145             | 509.9          | 0.45 | 1411.4           | Scott et al. (2000)       |
| 372 | 18.95     | -33.96   | 1946-1972 | Lambrechts Bos A in Jonkershoek        | South Africa | 1145             | 564.2          | 0.49 | 1402.77          | Scott et al. (2000)       |
| 373 | 18.95     | -33.96   | 1973-1998 | Lambrechts Bos A in Jonkershoek        | South Africa | 1145             | 331.4          | 0.29 | 1418.94          | Scott et al. (2000)       |
| 374 | 18.95     | -33.97   | 1938-1948 | Biesievlei in Jonkershoek              | South Africa | 1298             | 593.6          | 0.46 | 1410.2           | Scott et al. (2000)       |
| 375 | 18.95     | -33.97   | 1986-1998 | Biesievlei in Jonkershoek              | South Africa | 1298             | 416.5          | 0.32 | 1416.92          | Scott et al. (2000)       |
| 376 | 18.94     | -33.96   | 1938-1940 | Bosboukloof in Jonkershoek             | South Africa | 1127             | 245.9          | 0.22 | 1400.05          | Scott et al. (2001)       |
| 377 | 18.94     | -33.96   | 1984-1998 | Bosboukloof in Jonkershoek             | South Africa | 1127             | 568.3          | 0.5  | 1421.96          | Scott et al. (2002)       |
| 378 | 30.07     | -23.73   | 1975-1998 | Westfalia B                            | South Africa | 1253             | 492.3          | 0.39 | 1297.73          | Scott et al. (2000)       |
| 379 | 30.07     | -23.73   | 1975-1981 | Westfalia D                            | South Africa | 1253             | 590.5          | 0.47 | 1265.33          | Scott et al. (2000)       |
| 380 | 30.07     | -23.73   | 1983-1998 | Westfalia D                            | South Africa | 1253             | 190.5          | 0.15 | 1309.85          | Scott et al. (2000)       |
| 381 | 30.56     | -25.26   | 1957-1998 | Mokobulaan C                           | South Africa | 1199             | 117.9          | 0.1  | 1149.87          | Scott et al. (2000)       |
| 382 | 30.56     | -25.27   | 1956-1971 | Mokobulaan B                           | South Africa | 1180             | 195.8          | 0.17 | 1143.25          | Scott et al. (2000)       |
| 383 | 30.56     | -25.27   | 1972-1982 | Mokobulaan B                           | South Africa | 1180             | 167.6          | 0.14 | 1133.05          | Scott et al. (2000)       |
| 384 | 76.62     | 11.47    | 1972-1981 | Glenmorgan Ootacamund B                | India        | 1557             | 451            | 0.29 | 1395.2           | Sharda et al. (1998)      |
| 385 | 76.62     | 11.47    | 1982-1991 | Glenmorgan Ootacamund B                | India        | 1345             | 315            | 0.23 | 1403.17          | Sharda et al. (1998)      |
| 386 | 111.17    | 31.08    | 1970-1979 | Wuduhe                                 | China        | 1154             | 485            | 0.42 | 869.37           | Shi and Yuan (1998)       |
| 387 | 111.17    | 31.08    | 1980-1989 | Wuduhe                                 | China        | 1255             | 570            | 0.45 | 870.96           | Shi and Yuan (1998)       |
| 388 | 110.8     | 31.17    | 1980-1989 | Xiangxihe                              | China        | 1163             | 739            | 0.64 | 881.19           | Shi and Yuan (1998)       |
| 389 | 110.8     | 31.17    | 1970-1979 | Xiangxihe                              | China        | 1042             | 652            | 0.63 | 882.93           | Shi and Yuan (1998)       |
| 390 | 110.04    | 31       | 1993      | Duanfangxi small watershed             | China        | 1406             | 718            | 0.51 | 828              | Shi et al. (2003)         |
| 391 | 110.04    | 31       | 1997      | Duanfangxi small watershed             | China        | 1058             | 316            | 0.3  | 908.8            | Shi et al. (2003)         |
| 392 | 110.04    | 31       | 1998      | Duanfangxi small watershed             | China        | 1379             | 602            | 0.44 | 873.9            | Shi et al. (2003)         |

| No  | Longitude | Latitude | Year      | Watershed                                    | Country   | PRE<br>(mm yr-1) | R<br>(mm yr-1) | R/P  | PET<br>(mm yr-1) | References                                                |
|-----|-----------|----------|-----------|----------------------------------------------|-----------|------------------|----------------|------|------------------|-----------------------------------------------------------|
| 393 | 110.04    | 31       | 1994      | Duanfangxi small watershed                   | China     | 973              | 490            | 0.5  | 894.2            | Shi et al. (2003)                                         |
| 394 | 116.2     | -32.86   | 1980      | Yarragil 4L                                  | Australia | 964              | 1.7            | 0    | 1556.7           | Stoneman (1993)                                           |
| 395 | 116.2     | -32.86   | 1976      | Yarragil 4L                                  | Australia | 826              | 2.9            | 0    | 1603.4           | Stoneman (1993)                                           |
| 396 | 116.2     | -32.86   | 1978      | Yarragil 4L                                  | Australia | 858              | 5.9            | 0.01 | 1628.3           | Stoneman (1993)                                           |
| 397 | 116.2     | -32.86   | 1981      | Yarragil 4L                                  | Australia | 1079             | 13.3           | 0.01 | 1529.5           | Stoneman (1993)                                           |
| 398 | 116.2     | -32.86   | 1977      | Yarragil 4L                                  | Australia | 768              | 5.9            | 0.01 | 1633.1           | Stoneman (1993)                                           |
| 399 | 116.2     | -32.86   | 1987      | Yarragil 4L                                  | Australia | 777              | 7              | 0.01 | 1569.6           | Stoneman (1993)                                           |
| 400 | 116.2     | -32.86   | 1986      | Yarragil 4L                                  | Australia | 775              | 9.8            | 0.01 | 1517.8           | Stoneman (1993)                                           |
| 401 | 116.2     | -32.86   | 1988      | Yarragil 4L                                  | Australia | 1262             | 62.9           | 0.05 | 1589.8           | Stoneman (1993)                                           |
| 402 | 116.2     | -32.86   | 1990      | Yarragil 4L                                  | Australia | 975              | 57.3           | 0.06 | 1499.9           | Stoneman (1993)                                           |
| 403 | 116.2     | -32.86   | 1991      | Yarragil 4L                                  | Australia | 1139             | 89.7           | 0.08 | 1558.9           | Stoneman (1993)                                           |
| 404 | 103.4     | 26.45    | 2000-2007 | Toutang small watershed<br>Jinshajiang river | China     | 818              | 143            | 0.17 | 1000.3           | Su et al. (2009)                                          |
| 405 | -76.7     | 34.8     | 1983      | Careret Watershed NC                         | USA       | 1730             | 950            | 0.55 | 1174.1           | Sun et al (2005);Gerbert et al<br>(1987);Sun et al (2001) |
| 406 | -76.7     | 34.8     | 1984      | Careret Watershed NC                         | USA       | 1730             | 950            | 0.55 | 1160.3           | Sun et al (2005);Gerbert et al<br>(1987);Sun et al (2001) |
| 407 | -76.7     | 34.8     | 1985      | Careret Watershed NC                         | USA       | 1730             | 950            | 0.55 | 1272.9           | Sun et al (2005);Gerbert et al<br>(1987);Sun et al (2001) |
| 408 | -76.7     | 34.8     | 1986      | Careret Watershed NC                         | USA       | 1730             | 950            | 0.55 | 1245.7           | Sun et al (2005);Gerbert et al<br>(1987);Sun et al (2001) |
| 409 | -76.7     | 34.8     | 1987      | Careret Watershed NC                         | USA       | 1730             | 950            | 0.55 | 1167             | Sun et al (2005);Gerbert et al<br>(1987);Sun et al (2001) |
| 410 | -76.7     | 34.8     | 1988      | Careret Watershed NC                         | USA       | 1730             | 950            | 0.55 | 1166             | Sun et al (2005);Gerbert et al<br>(1987);Sun et al (2001) |
| 411 | -76.7     | 34.8     | 1989      | Careret Watershed NC                         | USA       | 1730             | 950            | 0.55 | 1147.5           | Sun et al (2005);Gerbert et al<br>(1987);Sun et al (2001) |
| 412 | -76.7     | 34.8     | 1990      | Careret Watershed NC                         | USA       | 1730             | 950            | 0.55 | 1290.7           | Sun et al (2005);Gerbert et al<br>(1987);Sun et al (2001) |
| 413 | -76.7     | 34.8     | 1991      | Careret Watershed NC                         | USA       | 1730             | 950            | 0.55 | 1245.4           | Sun et al (2005);Gerbert et al<br>(1987);Sun et al (2001) |
| 414 | -84.28    | 35.97    | 1969-1983 | Walker Branch TN                             | USA       | 1370             | 710            | 0.52 | 1022.08          | Sun et al. (2005)                                         |
| 415 | -82.62    | 35.3     |           | NC03443000                                   | USA       | 1984             | 1258           | 0.63 | 928.95           | Sun et al. (2005)                                         |
| 416 | -95.87    | 31.88    |           | TX12030201                                   | USA       | 1051             | 200            | 0.19 | 1361.37          | Sun et al. (2005)                                         |
| 417 | -83.76    | 37.15    |           | KY05100203                                   | USA       | 1235             | 521            | 0.42 | 1021.79          | Sun et al. (2005)                                         |
| 418 | -79.91    | 37.67    |           | VA02080201                                   | USA       | 1069             | 418            | 0.39 | 1026.59          | Sun et al. (2005)                                         |
| 419 | -79.49    | 35.06    |           | NC02133500                                   | USA       | 1183             | 480            | 0.41 | 1116.17          | Sun et al. (2005)                                         |
| 420 | -77.03    | 36.37    |           | NC02053200                                   | USA       | 1151             | 350            | 0.3  | 1125.01          | Sun et al. (2005)                                         |
| 421 | -83.8     | 35.33    |           | TN06010204                                   | USA       | 1517             | 832            | 0.55 | 961.33           | Sun et al. (2005)                                         |
| 422 | -83.76    | 37.15    |           | KY05070203                                   | USA       | 1076             | 412            | 0.38 | 1021.79          | Sun et al. (2005)                                         |
| 423 | -77.88    | 36.18    |           | NC02082950                                   | USA       | 1123             | 324            | 0.29 | 1107.44          | Sun et al. (2005)                                         |
| 424 | -79.91    | 37.67    |           | VA05050002                                   | USA       | 1053             | 480            | 0.46 | 1026.59          | Sun et al. (2005)                                         |
| 425 | -84.23    | 32.72    |           | GA03130005                                   | USA       | 1306             | 469            | 0.36 | 1241.09          | Sun et al. (2005)                                         |
| 426 | -85.09    | 35.97    |           | Walker Branch TN                             | USA       | 1331             | 660            | 0.5  | 1036.47          | Sun et al. (2005)                                         |
| 427 | -84.23    | 32.72    |           | GA03070103                                   | USA       | 1134             | 364            | 0.32 | 1241.09          | Sun et al. (2005)                                         |
| 428 | -89.99    | 32.27    |           | MS08060203                                   | USA       | 1338             | 478            | 0.36 | 1191.02          | Sun et al. (2005)                                         |
| 429 | -84.23    | 32.72    |           | GA03070101                                   | USA       | 1263             | 493            | 0.39 | 1241.09          | Sun et al. (2005)                                         |
| 430 | -81.41    | 36.39    |           | NC03161000                                   | USA       | 1441             | 755            | 0.52 | 1014.35          | Sun et al. (2005)                                         |
| 431 | -80.75    | 36       |           | NC02118500                                   | USA       | 1188             | 476            | 0.4  | 1129.53          | Sun et al. (2005)                                         |
| 432 | -80.69    | 36.34    |           | NC02113000                                   | USA       | 1159             | 502            | 0.43 | 1094.29          | Sun et al. (2005)                                         |

| No  | Longitude | Latitude | Year      | Watershed                                        | Country | PRE<br>(mm yr <sup>-1</sup> ) | R<br>(mm yr <sup>-1</sup> ) | R/P  | PET<br>(mm yr <sup>-1</sup> ) | References            |
|-----|-----------|----------|-----------|--------------------------------------------------|---------|-------------------------------|-----------------------------|------|-------------------------------|-----------------------|
| 433 | -106.8    | 37.77    | 1912-1919 | Wagon Wheel Gap A                                | USA     | 534                           | 153                         | 0.29 | 1124.57                       | Van Haveren (1988)    |
| 434 | 110.8     | 36.15    | 1980-1989 | Qingshui Shanxi                                  | China   | 516                           | 23                          | 0.04 | 980.18                        | Wang and Zhang (2001) |
| 435 | 110.8     | 36.15    | 1970-1979 | Qingshui Shanxi                                  | China   | 551                           | 46                          | 0.08 | 976.7                         | Wang and Zhang (2001) |
| 436 | 110.8     | 36.15    | 1960-1969 | Qingshui Shanxi                                  | China   | 589                           | 55                          | 0.09 | 968.22                        | Wang and Zhang (2001) |
| 437 | 123.02    | 47.38    | 1990-1999 | Yaluhe                                           | China   | 588                           | 189                         | 0.32 | 858.61                        | Wang et al. (2009)    |
| 438 | 123.02    | 47.38    | 1980-1989 | Yaluhe                                           | China   | 552                           | 162                         | 0.29 | 831.14                        | Wang et al. (2009)    |
| 439 | 123.02    | 47.38    | 1970-1979 | Yaluhe                                           | China   | 464                           | 121                         | 0.26 | 847.3                         | Wang et al. (2009)    |
| 440 | 123.02    | 47.38    | 1960-1969 | Yaluhe                                           | China   | 490                           | 169                         | 0.34 | 826.07                        | Wang et al. (2009)    |
| 441 | 123.56    | 48.07    | 1960-1969 | Alunhe                                           | China   | 468                           | 171                         | 0.37 | 759.3                         | Wang et al. (2009)    |
| 442 | 124.12    | 48.59    | 1960-1969 | Genihe                                           | China   | 475                           | 199                         | 0.42 | 724.13                        | Wang et al. (2009)    |
| 443 | 123.56    | 48.07    | 1980-1989 | Alunhe                                           | China   | 501                           | 148                         | 0.3  | 764.01                        | Wang et al. (2009)    |
| 444 | 123.56    | 48.07    | 1990-1999 | Alunhe                                           | China   | 523                           | 180                         | 0.34 | 786.47                        | Wang et al. (2009)    |
| 445 | 123.56    | 48.07    | 1970-1979 | Alunhe                                           | China   | 428                           | 106                         | 0.25 | 782.94                        | Wang et al. (2009)    |
| 446 | 124.12    | 48.59    | 1970-1979 | Genihe                                           | China   | 441                           | 119                         | 0.27 | 751.74                        | Wang et al. (2009)    |
| 447 | 124.12    | 48.59    | 1980-1989 | Genihe                                           | China   | 528                           | 211                         | 0.4  | 727.13                        | Wang et al. (2009)    |
| 448 | 124.12    | 48.59    | 1990-1999 | Genihe                                           | China   | 508                           | 228                         | 0.45 | 748.29                        | Wang et al. (2009)    |
| 449 | 100.35    | 38.55    | 1973-1980 | Tianlaochi                                       | China   | 599                           | 356                         | 0.59 | 876.43                        | Wang et al. (1999)    |
| 450 | 99.9      | 38.45    | 1973-1980 | Sidalong                                         | China   | 560                           | 442                         | 0.79 | 762.36                        | Wang et al. (1999)    |
| 451 | 112.57    | 23.17    | 1994      | Dinghushan                                       | China   | 2176.8                        | 1188                        | 0.55 | 1014.8                        | Wei et al. (2005)     |
| 452 | 112.57    | 23.17    | 1995      | Dinghushan                                       | China   | 1887.3                        | 945.3                       | 0.5  | 1030                          | Wei et al. (2005)     |
| 453 | -96.88    | 36.17    | 1970      | Council Creek watershed<br>Southern Great Plains | USA     | 700                           | 50                          | 0.07 | 1426.7                        | Wine and Zou (2012)   |
| 454 | -96.88    | 36.17    | 1980      | Council Creek watershed<br>Southern Great Plains | USA     | 800                           | 90                          | 0.11 | 1572.4                        | Wine and Zou (2012)   |
| 455 | -96.88    | 36.17    | 1950      | Council Creek watershed<br>Southern Great Plains | USA     | 700                           | 100                         | 0.14 | 1358.5                        | Wine and Zou (2012)   |
| 456 | -96.88    | 36.17    | 1990      | Council Creek watershed<br>Southern Great Plains | USA     | 850                           | 130                         | 0.15 | 1498                          | Wine and Zou (2012)   |
| 457 | -96.88    | 36.17    | 1960      | Council Creek watershed<br>Southern Great Plains | USA     | 900                           | 150                         | 0.17 | 1380.8                        | Wine and Zou (2012)   |
| 458 | -96.88    | 36.17    | 1945      | Council Creek watershed<br>Southern Great Plains | USA     | 750                           | 160                         | 0.21 | 1397.5                        | Wine and Zou (2012)   |
| 459 | 103.58    | 31.03    | 1961-1969 | Baishahe watershed                               | China   | 1610                          | 1181                        | 0.73 | 799.83                        | Yang and Zeng (1994)  |
| 460 | 104.57    | 29.07    | 1970-1979 | Dakeng watershed                                 | China   | 1519                          | 774                         | 0.51 | 827.88                        | Yang and Zeng (1994)  |
| 461 | 104.57    | 29.07    | 1961-1969 | Dakeng watershed                                 | China   | 1633                          | 983                         | 0.6  | 818.23                        | Yang and Zeng (1994)  |
| 462 | 115.12    | 29.33    | 1985-1988 | Yangjianghe watershed                            | China   | 1015                          | 463                         | 0.46 | 992.13                        | Yang and Zeng (1994)  |
| 463 | 103.58    | 31.03    | 1970-1979 | Baishahe watershed                               | China   | 1441                          | 1231                        | 0.85 | 810.23                        | Yang and Zeng (1994)  |
| 464 | 103.52    | 30.58    | 1970-1979 | Xiejiang watershed                               | China   | 1141                          | 794                         | 0.7  | 782.93                        | Yang and Zeng (1994)  |
| 465 | 103.52    | 30.58    | 1961-1969 | Xiejiang watershed                               | China   | 1123                          | 783                         | 0.7  | 772.82                        | Yang and Zeng (1994)  |
| 466 | 103.52    | 30.58    | 1980-1989 | Xiejiang watershed                               | China   | 1064                          | 756                         | 0.71 | 776.76                        | Yang and Zeng (1994)  |
| 467 | 105.63    | 31.98    | 1989-1992 | Yangjianghe watershed                            | China   | 1058                          | 593                         | 0.56 | 788.8                         | Yang and Zeng (1994)  |
| 468 | 105.64    | 31.96    | 1989-1992 | Yuanjiahe watershed                              | China   | 1063                          | 682                         | 0.64 | 788.8                         | Yang and Zeng (1994)  |
| 469 | 105.64    | 31.96    | 1985-1988 | Yuanjiahe watershed                              | China   | 996                           | 685                         | 0.69 | 806.03                        | Yang and Zeng (1994)  |
| 470 | 115.12    | 29.33    | 1985-1992 | Yangjianghe watershed                            | China   | 1036                          | 528                         | 0.51 | 990.51                        | Yang and Zeng (1994)  |
| 471 | 105.64    | 31.96    | 1985-1992 | Yuanjiahe watershed                              | China   | 1030                          | 683                         | 0.66 | 797.96                        | Yang and Zeng (1994)  |
| 472 | 111       | 36       | 1988      | Mujialing catchment F                            | China   | 338                           | 4                           | 0.01 | 974                           | Yang et al. (1994)    |
| 473 | 111       | 36       | 1989      | Mujialing catchment F                            | China   | 338                           | 4                           | 0.01 | 969.5                         | Yang et al. (1994)    |
| 474 | 111       | 36       | 1990      | Mujialing catchment F                            | China   | 395                           | 5                           | 0.01 | 1016.2                        | Yang et al. (1994)    |
| 475 | 111       | 36       | 1988      | Miaogou catchment F                              | China   | 399                           | 6                           | 0.02 | 974                           | Yang et al. (1994)    |

| No  | Longitude | Latitude | Year      | Watershed                           | Country | PRE<br>(mm yr-1) | R<br>(mm yr-1) | R/P  | PET<br>(mm yr-1) | References          |
|-----|-----------|----------|-----------|-------------------------------------|---------|------------------|----------------|------|------------------|---------------------|
| 476 | 111       | 36       | 1990      | Miaogou catchemnt F                 | China   | 398              | 7              | 0.02 | 1016.2           | Yang et al. (1994)  |
| 477 | 111       | 36       | 1989      | Miaogou catchemnt F                 | China   | 342              | 10             | 0.03 | 969.5            | Yang et al. (1994)  |
| 478 | 111       | 36       | 1988      | Mujialing catchment M               | China   | 338              | 5              | 0.01 | 974              | Yang et al. (1994)  |
| 479 | 111       | 36       | 1990      | Mujialing catchment M               | China   | 395              | 8              | 0.02 | 1016.2           | Yang et al. (1994)  |
| 480 | 111       | 36       | 1989      | Mujialing catchment M               | China   | 338              | 8              | 0.02 | 969.5            | Yang et al. (1994)  |
| 481 | 111       | 36       | 1988      | Miaogou catchemnt M                 | China   | 339              | 8              | 0.02 | 974              | Yang et al. (1994)  |
| 482 | 111       | 36       | 1989      | Miaogou catchemnt M                 | China   | 342              | 10             | 0.03 | 969.5            | Yang et al. (1994)  |
| 483 | 111       | 36       | 1990      | Miaogou catchemnt M                 | China   | 396              | 12             | 0.03 | 1016.2           | Yang et al. (1994)  |
| 484 | 116.33    | 40.67    | 2005      | Beizhuang small watershed G         | China   | 636              | 13             | 0.02 | 1134.3           | Yang et al. (2007)  |
| 485 | 116.33    | 40.67    | 2004      | Beizhuang small watershed G         | China   | 645              | 30             | 0.05 | 1108.5           | Yang et al. (2007)  |
| 486 | 116.33    | 40.67    | 2005      | Beizhuang small watershed F         | China   | 636              | 14             | 0.02 | 1134.3           | Yang et al. (2007)  |
| 487 | 116.33    | 40.67    | 2004      | Beizhuang small watershed F         | China   | 645              | 29             | 0.04 | 1108.5           | Yang et al. (2007)  |
| 488 | 121.64    | 47.2     | 1970-1982 | Zhuoerhe Nenhe                      | China   | 432              | 141            | 0.33 | 763.42           | Ying (1987)         |
| 489 | 121.64    | 47.2     | 1957-1970 | Zhuoerhe Nenhe                      | China   | 446              | 162            | 0.36 | 736.19           | Ying (1987)         |
| 490 | 121.39    | 49.61    | 1957-1970 | Haiergunahe and Kuduerhe            | China   | 392              | 130            | 0.33 | 609.92           | Ying (1987)         |
| 491 | 121.39    | 49.61    | 1970-1982 | Haiergunahe and Kuduerhe            | China   | 430              | 131            | 0.3  | 636.42           | Ying (1987)         |
| 492 | -81.78    | 38.24    | 1994      | Big Coal River watershed            | USA     | 1247             | 678            | 0.54 | 964.9            | Zegre et al (2013)  |
| 493 | -81.78    | 38.24    | 1997      | Big Coal River watershed            | USA     | 1061             | 419            | 0.39 | 899              | Zegre et al (2013)  |
| 494 | -81.78    | 38.24    | 2007      | Big Coal River watershed            | USA     | 1043             | 363            | 0.35 | 1053.4           | Zegre et al (2013)  |
| 495 | 116.43    | 39.71    | 1959-1967 | Yingding river                      | China   | 482              | 44             | 0.09 | 1019.21          | Zhang (1984)        |
| 496 | 116.43    | 39.71    | 1959-1967 | Yingding river                      | China   | 414              | 35             | 0.08 | 1019.21          | Zhang (1984)        |
| 497 | 110.78    | 36.23    | 2002      | Beipo in Caijiachuan watershed      | China   | 350              | 1.4            | 0    | 1032.6           | Zhang et al. (2006) |
| 498 | 110.78    | 36.23    | 2001      | Beipo in Caijiachuan watershed      | China   | 356.8            | 1.8            | 0.01 | 1043.2           | Zhang et al. (2006) |
| 499 | 110.78    | 36.23    | 2002      | Liugou in Caijiachuan watershed     | China   | 371.4            | 5.2            | 0.01 | 1032.6           | Zhang et al. (2006) |
| 500 | 110.78    | 36.23    | 2001      | Liugou in Caijiachuan watershed     | China   | 360              | 5.4            | 0.02 | 1043.2           | Zhang et al. (2006) |
| 501 | 110.78    | 36.23    | 2002      | Liujiaao in Caijiachuan watershed   | China   | 366.7            | 5.5            | 0.01 | 1032.6           | Zhang et al. (2006) |
| 502 | 110.78    | 36.23    | 2001      | Liujiaao in Caijiachuan watershed   | China   | 368.75           | 5.9            | 0.02 | 1043.2           | Zhang et al. (2006) |
| 503 | 110.78    | 36.23    | 2002      | Jinggou in Caijiachuan watershed    | China   | 343.18           | 15.1           | 0.04 | 1032.6           | Zhang et al. (2006) |
| 504 | 110.78    | 36.23    | 2001      | Jinggou in Caijiachuan watershed    | China   | 367.39           | 16.9           | 0.05 | 1043.2           | Zhang et al. (2006) |
| 505 | 110.78    | 36.23    | 2001      | Nanbeijiao in Caijiachuan watershed | China   | 358.6            | 27.5           | 0.08 | 1043.2           | Zhang et al. (2006) |
| 506 | 110.78    | 36.23    | 2002      | Nanbeijiao in Caijiachuan watershed | China   | 355.1            | 28.4           | 0.08 | 1032.6           | Zhang et al. (2006) |
| 507 | 110.01    | 36.25    | 1980-2000 | Yunyanhe Linzhen                    | China   | 508              | 16             | 0.03 | 988.51           | Zhang et al. (2007) |
| 508 | 110.32    | 36.12    | 1980-2000 | Yunyanhe Xinshihe                   | China   | 507              | 20             | 0.04 | 988.51           | Zhang et al. (2007) |
| 509 | 109.34    | 36.53    | 1980-2000 | Yanhe Zaooyuan                      | China   | 488              | 35             | 0.07 | 976.11           | Zhang et al. (2007) |
| 510 | 109.82    | 36.61    | 1980-2000 | Yanhe Ganguyi                       | China   | 470              | 34             | 0.07 | 989.3            | Zhang et al. (2007) |
| 511 | 109.3     | 37.87    | 1980-2000 | Wudinghe Hengshan                   | China   | 378              | 21             | 0.06 | 1001.62          | Zhang et al. (2007) |
| 512 | 109.86    | 37.5     | 1980-2000 | Wudinghe Lijiahe                    | China   | 392              | 31             | 0.08 | 999.19           | Zhang et al. (2007) |
| 513 | 109.23    | 37.27    | 1980-2000 | Wudinghe Qingyangcha                | China   | 413              | 34             | 0.08 | 969.48           | Zhang et al. (2007) |
| 514 | 108.88    | 36.84    | 1980-2000 | Yanhe Xinghe                        | China   | 439              | 37             | 0.08 | 954.13           | Zhang et al. (2007) |
| 515 | 109.46    | 36.54    | 1980-2000 | Yanhe Yanan                         | China   | 456              | 39             | 0.09 | 976.11           | Zhang et al. (2007) |

| No  | Longitude | Latitude | Year      | Watershed            | Country | PRE<br>(mm yr <sup>-1</sup> ) | R<br>(mm yr <sup>-1</sup> ) | R/P  | PET<br>(mm yr <sup>-1</sup> ) | References             |
|-----|-----------|----------|-----------|----------------------|---------|-------------------------------|-----------------------------|------|-------------------------------|------------------------|
| 516 | 110.22    | 36.78    | 1980-2000 | Qingjianhe Yanchuan  | China   | 455                           | 39                          | 0.09 | 992.02                        | Zhang et al. (2007)    |
| 517 | 109.33    | 36.76    | 1980-2000 | Yanhe Ansai          | China   | 446                           | 40                          | 0.09 | 976.11                        | Zhang et al. (2007)    |
| 518 | 109.72    | 37.05    | 1980-2000 | Qingjianhe Zichang   | China   | 444                           | 41                          | 0.09 | 983.52                        | Zhang et al. (2007)    |
| 519 | 110.01    | 37.54    | 1980-2000 | Wudinghe Caoping     | China   | 403                           | 38                          | 0.09 | 1016.36                       | Zhang et al. (2007)    |
| 520 | 109.5     | 37.83    | 1980-2000 | Wudinghe Dingshi     | China   | 375                           | 36                          | 0.1  | 999.19                        | Zhang et al. (2007)    |
| 521 | 110.05    | 37.78    | 1980-2000 | Wudinghe Mahuyu      | China   | 391                           | 38                          | 0.1  | 1016.36                       | Zhang et al. (2007)    |
| 522 | 109.17    | 37.97    | 1980-2000 | Wudinghe Hanjiamao   | China   | 317                           | 31                          | 0.1  | 1001.62                       | Zhang et al. (2007)    |
| 523 | 110.75    | 38.49    | 1980-2000 | Kuyehe Wangdaohengta | China   | 346                           | 40                          | 0.12 | 999.46                        | Zhang et al. (2007)    |
| 524 | 110.4     | 39.24    | 1980-2000 | Kuyehe Xinmiao       | China   | 357                           | 53                          | 0.15 | 1010.75                       | Zhang et al. (2007)    |
| 525 | 110.54    | 38.7     | 1980-2000 | Kuyehe Shenmu        | China   | 356                           | 55                          | 0.15 | 1000.51                       | Zhang et al. (2007)    |
| 526 | 110.75    | 38.49    | 1980-2000 | Kuyehe Weijiachuan   | China   | 361                           | 56                          | 0.16 | 999.46                        | Zhang et al. (2007)    |
| 527 | 110.72    | 36.27    | 2004      | Artificial forests   | China   | 316                           | 18                          | 0.06 | 1053.3                        | Zheng and Zhang (2010) |
| 528 | 110.72    | 36.27    | 2004      | Natural forests      | China   | 316                           | 5                           | 0.02 | 1053.3                        | Zheng and Zhang (2010) |
| 529 | 110.72    | 36.27    | 2005      | Artificial forests   | China   | 258                           | 7                           | 0.03 | 1090.9                        | Zheng and Zhang (2010) |
| 530 | 110.72    | 36.27    | 2005      | Natural forests      | China   | 299                           | 4                           | 0.01 | 1090.9                        | Zheng and Zhang (2010) |
| 531 | 110.72    | 36.27    | 2006      | Artificial forests   | China   | 576                           | 13                          | 0.02 | 1057.2                        | Zheng and Zhang (2010) |
| 532 | 110.72    | 36.27    | 2006      | Natural forests      | China   | 513                           | 10                          | 0.02 | 1057.2                        | Zheng and Zhang (2010) |
| 533 | 110.72    | 36.27    | 2007      | Artificial forests   | China   | 455                           | 10                          | 0.02 | 1053.6                        | Zheng and Zhang (2010) |
| 534 | 110.72    | 36.27    | 2007      | Natural forests      | China   | 361                           | 7                           | 0.02 | 1053.6                        | Zheng and Zhang (2010) |
| 535 | 110.72    | 36.27    | 2008      | Artificial forests   | China   | 294                           | 8                           | 0.03 | 1058.2                        | Zheng and Zhang (2010) |
| 536 | 110.72    | 36.27    | 2008      | Natural forests      | China   | 287                           | 5                           | 0.02 | 1058.2                        | Zheng and Zhang (2010) |
| 537 | 110.72    | 36.27    | 2009      | Artificial forests   | China   | 423                           | 10                          | 0.02 | 1057.6                        | Zheng and Zhang (2010) |
| 538 | 110.72    | 36.27    | 2009      | Natural forests      | China   | 413                           | 7                           | 0.02 | 1057.6                        | Zheng and Zhang (2010) |
| 539 | 116.5     | 41       | 1963-1979 | Chaohe               | China   | 518                           | 80                          | 0.15 | 1012.1                        | Wang et al. (2013))    |
| 540 | 116.5     | 41       | 1980-1989 | Chaohe               | China   | 480                           | 45                          | 0.09 | 1054.17                       | Wang et al. (2013)     |
| 541 | 116.5     | 41       | 1990-1999 | Chaohe               | China   | 532                           | 72                          | 0.14 | 1056.23                       | Wang et al. (2013)     |
| 542 | 116.5     | 41       | 2000-2009 | Chaohe               | China   | 451                           | 29                          | 0.06 | 1093.77                       | Wang et al. (2013)     |
| 543 | 111.15    | 39.18    | 1969      | Huangfu              | China   | 405.8                         | 57.8                        | 0.14 | 921.3                         | Zhang et al. ( 2009)   |
| 544 | 111.15    | 39.18    | 1989      | Huangfu              | China   | 378.8                         | 31.6                        | 0.08 | 970.3                         | Zhang et al. ( 2009)   |
| 545 | 111.04    | 39.05    | 1969      | Gushan               | China   | 462.3                         | 83                          | 0.18 | 921.3                         | Zhang et al. ( 2009)   |
| 546 | 111.04    | 39.05    | 1993      | Gushan               | China   | 406.7                         | 43.6                        | 0.11 | 1000                          | Zhang et al. ( 2009)   |
| 547 | 110.51    | 37.96    | 1969      | Jialu                | China   | 435.5                         | 82.6                        | 0.19 | 979.9                         | Zhang et al. (2008)    |
| 548 | 110.51    | 37.96    | 1992      | Jialu                | China   | 381.7                         | 38.7                        | 0.1  | 1005.2                        | Zhang et al. (2008)    |
| 549 | 110.75    | 38.44    | 1969      | Kuye                 | China   | 413.7                         | 84.6                        | 0.2  | 964.4                         | Zhang et al. (2008)    |
| 550 | 110.75    | 38.44    | 1991      | Kuye                 | China   | 386.2                         | 58.6                        | 0.15 | 1015.4                        | Zhang et al. (2008)    |
| 551 | 110.67    | 37.41    | 1969      | Sanchuan             | China   | 480.3                         | 71.1                        | 0.15 | 982.7                         | Zhang et al. (2008)    |
| 552 | 110.67    | 37.41    | 1996      | Sanchuan             | China   | 445.4                         | 43.7                        | 0.1  | 926.6                         | Zhang et al. (2008)    |
| 553 | 110.34    | 35.98    | 1969      | Shiwang              | China   | 565.4                         | 42.2                        | 0.07 | 1007.2                        | Zhang et al. (2008)    |
| 554 | 110.34    | 35.98    | 1994      | Shiwang              | China   | 489.7                         | 23.5                        | 0.05 | 1040.6                        | Zhang et al. (2008)    |
| 555 | 110.87    | 38.35    | 1969      | Weifen               | China   | 520.6                         | 53.3                        | 0.1  | 964.4                         | Zhang et al. (2008)    |
| 556 | 110.87    | 38.35    | 1997      | Weifen               | China   | 461.2                         | 28.7                        | 0.06 | 1039.9                        | Zhang et al. (2008)    |
| 557 | 110.62    | 36.77    | 1969      | Xinshui              | China   | 574                           | 46.3                        | 0.08 | 991.6                         | Zhang et al. (2008)    |
| 558 | 110.62    | 36.77    | 1995      | Xinshui              | China   | 474.6                         | 23.1                        | 0.05 | 1081.6                        | Zhang et al. (2008)    |
| 559 | 111.04    | 38.96    | 1969      | Zhujia               | China   | 497                           | 19.8                        | 0.04 | 939.5                         | Zhang et al. (2008)    |
| 560 | 111.04    | 38.96    | 1998      | Zhujia               | China   | 431.7                         | 5.9                         | 0.01 | 990.1                         | Zhang et al. (2008)    |
| 561 | 99        | 25       | 1965-1986 | Kejie watershed      | China   | 994.4                         | 387.4                       | 0.39 | 979.47                        | Ma et al. (2009)       |
| 562 | 99        | 25       | 1987-2005 | Kejie watershed      | China   | 1004                          | 365.3                       | 0.36 | 986.4                         | Ma et al. (2009)       |

| No  | Longitude | Latitude | Year      | Watershed                                | Country        | PRE<br>(mm yr-1) | R<br>(mm yr-1) | R/P  | PET<br>(mm yr-1) | References                                                                                                            |
|-----|-----------|----------|-----------|------------------------------------------|----------------|------------------|----------------|------|------------------|-----------------------------------------------------------------------------------------------------------------------|
| 563 | -55.68    | -31.53   | 1975-1993 | Upper Tacuarembó                         | Uruguay        | 1310             | 590            | 0.45 | 1237.65          | Silveira and Alonso (2009)                                                                                            |
| 564 | -55.68    | -31.53   | 1994-2008 | Upper Tacuarembó                         | Uruguay        | 1550             | 691            | 0.45 | 1225.7           | Silveira and Alonso (2009)                                                                                            |
| 565 | 116.06    | -32.61   | 1978      | Hansen catchment                         | Australia      | 1098             | 52             | 0.05 | 1628.3           | Ruprecht and Schofield (1991)                                                                                         |
| 566 | 116.06    | -32.61   | 1988      | Hansen catchment                         | Australia      | 1572             | 423            | 0.27 | 1589.8           | Ruprecht and Schofield (1991)                                                                                         |
| 567 | -4.37     | 56.36    | 1983-1985 | Kirkton                                  | United Kingdom | 2260             | 1821           | 0.81 | 453.65           | Blackie (1993)                                                                                                        |
| 568 | -4.37     | 56.36    | 1986-1989 | Kirkton                                  | United Kingdom | 2425             | 2014           | 0.83 | 435.2            | Blackie (1993)                                                                                                        |
| 569 | 78.09     | 30.44    |           | Arnigad catchment                        | India          | 2922             | 1613           | 0.55 | 1327.62          | Qazi et al. (2017)                                                                                                    |
| 570 | 19.75     | 48.93    | 1990      | Boca River Catchment                     | Slovakia       | 827              | 385.18         | 0.47 | 668.8            | Danáčová et al. (2020)                                                                                                |
| 571 | 116.33    | 40.67    | 2003      | Beizhuang small watershed G              | China          | 240              | 1.72           | 0.01 | 1003             | Yang et al. (2007)                                                                                                    |
| 572 | 116.33    | 40.67    | 2003      | Beizhuang small watershed F              | China          | 240              | 2.33           | 0.01 | 1003             | Yang et al. (2007)                                                                                                    |
| 573 | -78.35    | 38.64    | 1966      | Leading Ridge Experimental Watersheds P2 | USA            | 1060             | 440            | 0.42 | 1007.1           | Hornbeck et al. (1995)                                                                                                |
| 574 | -78.35    | 38.64    | 1967      | Leading Ridge Experimental Watersheds P2 | USA            | 967              | 491            | 0.51 | 951.2            | Hornbeck et al. (1995)                                                                                                |
| 575 | -78.35    | 38.64    | 1971      | Leading Ridge Experimental Watersheds P2 | USA            | 1061             | 490            | 0.46 | 1011.8           | Hornbeck et al. (1995)                                                                                                |
| 576 | -78.35    | 38.64    | 1975      | Leading Ridge Experimental Watersheds P2 | USA            | 1214             | 633            | 0.52 | 987.7            | Hornbeck et al. (1995)                                                                                                |
| 577 | -79.68    | 39.08    | 1963      | Fernow Experimental Forest WV7           | USA            | 1316             | 805            | 0.61 | 845.5            | Hornbeck et al. (1995)                                                                                                |
| 578 | -71.75    | 43.93    | 1964      | Hubbard Brook Experimental Forest NH2    | USA            | 1340             | 880            | 0.66 | 747.8            | Hornbeck et al. (1993)                                                                                                |
| 579 | -71.6     | 43.9     | 1991-1992 | Cone Pond NH                             | USA            | 1260             | 690            | 0.55 | 762.5            | Hornbeck et al. (1997)                                                                                                |
| 580 | -71.6     | 43.9     | 1993-1994 | Cone Pond NH                             | USA            | 1260             | 590            | 0.47 | 729.7            | Hornbeck et al. (1997)                                                                                                |
| 581 | -72.08    | 44.47    | 1991-1992 | Sleepers River                           | USA            | 1170             | 640            | 0.55 | 744.3            | Hornbeck et al. (1997)                                                                                                |
| 582 | -72.08    | 44.47    | 1993-1994 | Sleepers River                           | USA            | 1300             | 720            | 0.55 | 696.3            | Hornbeck et al. (1997)                                                                                                |
| 583 | -111.61   | 38.92    | 1954      | Drainages A                              | USA            | 518              | 43             | 0.08 | 1308.8           | Hibbert (1971);Hibbert (1979)                                                                                         |
| 584 | -111.61   | 38.92    | 1971      | Drainages A                              | USA            | 452              | 56             | 0.12 | 1232.7           | Hibbert (1971);Hibbert (1979)                                                                                         |
| 585 | -109.3    | 33.72    | 1954      | Drainages C                              | USA            | 518              | 34             | 0.07 | 1421.1           | Hibbert (1971);Hibbert (1979)                                                                                         |
| 586 | -109.3    | 33.72    | 1971      | Drainages C                              | USA            | 452              | 39             | 0.09 | 1382.8           | Hibbert (1971);Hibbert (1979)                                                                                         |
| 587 | -111.29   | 33.62    | 1965      | Three Bar B                              | USA            | 620              | 9              | 0.01 | 1743.7           | Hibbert (1971)                                                                                                        |
| 588 | -111.29   | 33.62    | 1972      | Three Bar B                              | USA            | 564              | 39             | 0.07 | 1834.2           | Hibbert (1971)                                                                                                        |
| 589 | -111.29   | 33.62    | 1979      | Three Bar B                              | USA            | 671              | 126            | 0.19 | 1801.1           | Hibbert (1971)                                                                                                        |
| 590 | -111.29   | 33.62    | 1961      | Three Bar C                              | USA            | 554              | 82             | 0.15 | 1818.8           | Hibbert (1971)                                                                                                        |
| 591 | -111.29   | 33.62    | 1979      | Three Bar C                              | USA            | 693              | 230            | 0.33 | 1801.1           | Hibbert (1971)                                                                                                        |
| 592 | -111.29   | 33.62    | 1969      | Three Bar F                              | USA            | 750              | 53             | 0.07 | 1792.8           | Hibbert (1979 );Hibbert (1971);Hibbert and Ingebo (1971);Ingebo and Hibbert(1974);Hibbert et al.(1975);Hibbert (1969) |
| 593 | -111.29   | 33.62    | 1979      | Three Bar F                              | USA            | 777              | 132            | 0.17 | 1801.1           | Hibbert (1979 );Hibbert (1971);Hibbert and Ingebo (1971);Ingebo and Hibbert(1974);Hibbert et al.(1975);Hibbert (1969) |
| 594 | -112.5    | 34.49    | 1967      | White Spar B                             | USA            | 600              | 40             | 0.07 | 1685.2           | Hibbert (1971);Hibbert (1979)                                                                                         |
| 595 | -112.5    | 34.49    | 1973      | White Spar B                             | USA            | 587              | 56             | 0.1  | 1726.1           | Hibbert (1971);Hibbert (1979)                                                                                         |

| No  | Longitude | Latitude | Year | Watershed                               | Country   | PRE<br>(mm yr-1) | R<br>(mm yr-1) | R/P  | PET<br>(mm yr-1) | References                                                                                                            |
|-----|-----------|----------|------|-----------------------------------------|-----------|------------------|----------------|------|------------------|-----------------------------------------------------------------------------------------------------------------------|
| 596 | -112.5    | 34.49    | 1980 | White Spar B                            | USA       | 589              | 69             | 0.12 | 1742.9           | Hibbert (1979 );Hibbert (1971);Hibbert and Ingebo (1971);Ingebo and Hibbert(1974);Hibbert et al.(1975);Hibbert (1969) |
| 597 | -111.78   | 34.64    | 1968 | WS12 in Beaver Creek                    | USA       | 617              | 150            | 0.24 | 1688             | Baker (1986)                                                                                                          |
| 598 | -111.78   | 34.64    | 1982 | WS12 in Beaver Creek                    | USA       | 552              | 186            | 0.34 | 1624.4           | Baker (1986)                                                                                                          |
| 599 | -111.78   | 34.64    | 1968 | WS13 in Beaver Creek                    | USA       | 609              | 93             | 0.15 | 1688             | Baker (1986)                                                                                                          |
| 600 | -111.78   | 34.64    | 1982 | WS13 in Beaver Creek                    | USA       | 592              | 94             | 0.16 | 1624.4           | Baker (1986)                                                                                                          |
| 601 | -111.78   | 34.64    | 1968 | WS17 in Beaver Creek                    | USA       | 726              | 206            | 0.28 | 1688             | Baker (1986)                                                                                                          |
| 602 | -111.78   | 34.64    | 1982 | WS17 in Beaver Creek                    | USA       | 717              | 256            | 0.36 | 1624.4           | Baker (1986)                                                                                                          |
| 603 | -111.78   | 34.64    | 1968 | WS18 in Beaver Creek                    | USA       | 728              | 180            | 0.25 | 1688             | Baker (1986)                                                                                                          |
| 604 | -111.78   | 34.64    | 1982 | WS18 in Beaver Creek                    | USA       | 733              | 197            | 0.27 | 1624.4           | Baker (1986)                                                                                                          |
| 605 | -111.78   | 34.64    | 1968 | WS8 in Beaver Creek                     | USA       | 679              | 174            | 0.26 | 1688             | Baker (1986)                                                                                                          |
| 606 | -111.78   | 34.64    | 1982 | WS8 in Beaver Creek                     | USA       | 808              | 337            | 0.42 | 1624.4           | Baker (1986)                                                                                                          |
| 607 | -111.78   | 34.64    | 1968 | WS16 in Beaver Creek                    | USA       | 703              | 135            | 0.19 | 1688             | Baker (1986)                                                                                                          |
| 608 | -111.78   | 34.64    | 1982 | WS16 in Beaver Creek                    | USA       | 748              | 236            | 0.32 | 1624.4           | Baker (1986)                                                                                                          |
| 609 | -111.78   | 34.64    | 1968 | WS15 in Beaver Creek                    | USA       | 685              | 99             | 0.14 | 1688             | Baker (1986)                                                                                                          |
| 610 | -111.78   | 34.64    | 1982 | WS15 in Beaver Creek                    | USA       | 785              | 161            | 0.21 | 1624.4           | Baker (1986)                                                                                                          |
| 611 | -111.78   | 34.64    | 1968 | WS14 in Beaver Creek                    | USA       | 650              | 117            | 0.18 | 1688             | Baker (1986)                                                                                                          |
| 612 | -111.78   | 34.64    | 1982 | WS14 in Beaver Creek                    | USA       | 709              | 180            | 0.25 | 1624.4           | Baker (1986)                                                                                                          |
| 613 | -111.78   | 34.64    | 1968 | WS9 in Beaver Creek                     | USA       | 645              | 155            | 0.24 | 1688             | Baker (1986)                                                                                                          |
| 614 | -111.78   | 34.64    | 1982 | WS9 in Beaver Creek                     | USA       | 663              | 211            | 0.32 | 1624.4           | Baker (1986)                                                                                                          |
| 615 | -111.78   | 34.64    | 1968 | Experimental watershed1 in Beaver Creek | USA       | 453              | 22             | 0.05 | 1688             | Baker (1984)                                                                                                          |
| 616 | -111.78   | 34.64    | 1982 | Experimental watershed1 in Beaver Creek | USA       | 518              | 60             | 0.12 | 1624.4           | Baker (1984)                                                                                                          |
| 617 | -111.78   | 34.64    | 1968 | Experimental watershed2 in Beaver Creek | USA       | 466              | 25             | 0.05 | 1688             | Baker (1984)                                                                                                          |
| 618 | -111.78   | 34.64    | 1982 | Experimental watershed2 in Beaver Creek | USA       | 524              | 62             | 0.12 | 1624.4           | Baker (1984)                                                                                                          |
| 619 | 46.52     | -19.35   |      | Madagascar D6                           | USA       | 1885             | 828            | 0.44 | 1110.71          | Bailly et al.(1979)                                                                                                   |
| 620 | 46.52     | -19.35   |      | Madagascar D7                           | USA       | 1880             | 867            | 0.46 | 1110.71          | Bailly et al.(1980)                                                                                                   |
| 621 | -87.06    | 36.19    |      | White Hollow                            | USA       | 1184             | 460            | 0.39 | 1126.46          | Bosch and Hewlett (1982)                                                                                              |
| 622 | -120.75   | 39.1     | 1956 | Watershed C                             | USA       | 635              | 145            | 0.23 | 1254.1           | Burgy and Papazafiriou (1971)                                                                                         |
| 623 | -120.75   | 39.1     | 1962 | Watershed C                             | USA       | 635              | 256            | 0.4  | 1266.5           | Burgy and Papazafiriou (1971)                                                                                         |
| 624 | 115.99    | -33.42   | 1974 | Wights catchment of Collie River basin  | Australia | 1326             | 320            | 0.24 | 1531.7           | Ruprecht and Schofield (1989)                                                                                         |
| 625 | 115.99    | -33.42   | 1977 | Wights catchment of Collie River basin  | Australia | 877              | 164            | 0.19 | 1602.5           | Ruprecht and Schofield (1989)                                                                                         |
| 626 | 115.99    | -33.42   | 1976 | Wights catchment of Collie River basin  | Australia | 822              | 19             | 0.02 | 1567.1           | Ruprecht and Schofield (1989)                                                                                         |
| 627 | 115.99    | -33.42   | 1975 | Wights catchment of Collie River basin  | Australia | 1027             | 81             | 0.08 | 1551.2           | Ruprecht and Schofield (1989)                                                                                         |
| 628 | 115.99    | -33.42   | 1975 | Wights catchment of Collie River basin  | Australia | 1027             | 81             | 0.08 | 1551.2           | Ruprecht and Schofield (1989)                                                                                         |
| 629 | 115.99    | -33.42   | 1976 | Wights catchment of Collie River basin  | Australia | 822              | 164            | 0.2  | 1567.1           | Ruprecht and Schofield (1989)                                                                                         |
| 630 | 115.99    | -33.42   | 1977 | Wights catchment of Collie River basin  | Australia | 877              | 217            | 0.25 | 1602.5           | Ruprecht and Schofield (1989)                                                                                         |

| No  | Longitude | Latitude | Year | Watershed                              | Country   | PRE<br>(mm yr-1) | R<br>(mm yr-1) | R/P  | PET<br>(mm yr-1) | References                    |
|-----|-----------|----------|------|----------------------------------------|-----------|------------------|----------------|------|------------------|-------------------------------|
| 631 | 115.99    | -33.42   | 1978 | Wights catchment of Collie River basin | Australia | 943              | 217            | 0.23 | 1611             | Ruprecht and Schofield (1989) |
| 632 | 115.99    | -33.42   | 1979 | Wights catchment of Collie River basin | Australia | 781              | 128            | 0.16 | 1534.9           | Ruprecht and Schofield (1989) |
| 633 | 115.99    | -33.42   | 1980 | Wights catchment of Collie River basin | Australia | 1165             | 351            | 0.3  | 1511.5           | Ruprecht and Schofield (1989) |
| 634 | 115.99    | -33.42   | 1981 | Wights catchment of Collie River basin | Australia | 1347             | 481            | 0.36 | 1487.2           | Ruprecht and Schofield (1989) |
| 635 | 115.99    | -33.42   | 1982 | Wights catchment of Collie River basin | Australia | 837              | 277            | 0.33 | 1497.6           | Ruprecht and Schofield (1989) |
| 636 | 115.99    | -33.42   | 1983 | Wights catchment of Collie River basin | Australia | 1147             | 561            | 0.49 | 1539.9           | Ruprecht and Schofield (1989) |
| 637 | 115.99    | -33.42   | 1984 | Wights catchment of Collie River basin | Australia | 1050             | 417            | 0.4  | 1493.9           | Ruprecht and Schofield (1989) |
| 638 | 115.99    | -33.42   | 1985 | Wights catchment of Collie River basin | Australia | 1105             | 421            | 0.38 | 1544.1           | Ruprecht and Schofield (1989) |
| 639 | 115.99    | -33.42   | 1986 | Wights catchment of Collie River basin | Australia | 770              | 249            | 0.32 | 1469.2           | Ruprecht and Schofield (1989) |
| 640 | 116.47    | -33.28   | 1974 | Dons catchment Collie River Basin      | Australia | 919              | 51             | 0.06 | 1537.6           | Williamson et al. (1987)      |
| 641 | 116.47    | -33.28   | 1975 | Dons catchment Collie River Basin      | Australia | 726              | 1              | 0    | 1557.2           | Williamson et al. (1987)      |
| 642 | 116.47    | -33.28   | 1980 | Dons catchment Collie River Basin      | Australia | 731              | 4              | 0.01 | 1535.6           | Williamson et al. (1987)      |
| 643 | 116.47    | -33.28   | 1981 | Dons catchment Collie River Basin      | Australia | 983              | 35             | 0.04 | 1496.2           | Williamson et al. (1987)      |
| 644 | 116.47    | -33.28   | 1982 | Dons catchment Collie River Basin      | Australia | 525              | 4              | 0.01 | 1518.7           | Williamson et al. (1987)      |
| 645 | 116.47    | -33.28   | 1983 | Dons catchment Collie River Basin      | Australia | 834              | 56             | 0.07 | 1536.3           | Williamson et al. (1987)      |
| 646 | 116.41    | -33.29   | 1974 | Lemon catchment Collie River Basin     | Australia | 976              | 49             | 0.05 | 1537.6           | Williamson et al. (1987)      |
| 647 | 116.41    | -33.29   | 1975 | Lemon catchment Collie River Basin     | Australia | 739              | 5              | 0.01 | 1557.2           | Williamson et al. (1987)      |
| 648 | 116.41    | -33.29   | 1976 | Lemon catchment Collie River Basin     | Australia | 594              | 1              | 0    | 1564.2           | Williamson et al. (1987)      |
| 649 | 116.41    | -33.29   | 1977 | Lemon catchment Collie River Basin     | Australia | 650              | 7              | 0.01 | 1617.8           | Williamson et al. (1987)      |
| 650 | 116.41    | -33.29   | 1978 | Lemon catchment Collie River Basin     | Australia | 727              | 25             | 0.03 | 1613.5           | Williamson et al. (1987)      |
| 651 | 116.41    | -33.29   | 1979 | Lemon catchment Collie River Basin     | Australia | 605              | 3              | 0    | 1559.4           | Williamson et al. (1987)      |
| 652 | 116.41    | -33.29   | 1980 | Lemon catchment Collie River Basin     | Australia | 731              | 12             | 0.02 | 1535.6           | Williamson et al. (1987)      |
| 653 | 116.41    | -33.29   | 1981 | Lemon catchment Collie River Basin     | Australia | 990              | 46             | 0.05 | 1496.2           | Williamson et al. (1987)      |
| 654 | 116.41    | -33.29   | 1982 | Lemon catchment Collie River Basin     | Australia | 532              | 10             | 0.02 | 1518.7           | Williamson et al. (1987)      |
| 655 | 116.41    | -33.29   | 1983 | Lemon catchment Collie River Basin     | Australia | 821              | 56             | 0.07 | 1536.3           | Williamson et al. (1987)      |
| 656 | 116.04    | -33.82   | 1978 | Padbury Reservoir                      | Australia | 844              | 196            | 0.23 | 1576.9           | Borg et al. (1997)            |
| 657 | 116.04    | -33.82   | 1979 | Padbury Reservoir                      | Australia | 650              | 72             | 0.11 | 1510.8           | Borg et al. (1998)            |
| 658 | 116.04    | -33.82   | 1980 | Padbury Reservoir                      | Australia | 929              | 157            | 0.17 | 1496             | Borg et al. (1999)            |

| No  | Longitude | Latitude | Year      | Watershed                        | Country   | PRE<br>(mm yr-1) | R<br>(mm yr-1) | R/P  | PET<br>(mm yr-1) | References                                                                             |
|-----|-----------|----------|-----------|----------------------------------|-----------|------------------|----------------|------|------------------|----------------------------------------------------------------------------------------|
| 659 | 116.04    | -33.82   | 1981      | Padbury Reservoir                | Australia | 822              | 118            | 0.14 | 1456.6           | Borg et al. (2000)                                                                     |
| 660 | 116.04    | -33.82   | 1982      | Padbury Reservoir                | Australia | 708              | 39             | 0.06 | 1479.3           | Borg et al. (2001)                                                                     |
| 661 | 116.04    | -33.82   | 1983      | Padbury Reservoir                | Australia | 966              | 170            | 0.18 | 1497             | Borg et al. (2002)                                                                     |
| 662 | 151.71    | -32.17   | 1977      | Kokata                           | Australia | 1565             | 531            | 0.34 | 1282.8           | Cornish (1993)                                                                         |
| 663 | 151.71    | -32.17   | 1983      | Kokata                           | Australia | 1790             | 807            | 0.45 | 1192.5           | Cornish (1993)                                                                         |
| 664 | 151.7     | -32.15   | 1977      | Barratta                         | Australia | 1518             | 590            | 0.39 | 1282.8           | Cornish (1993)                                                                         |
| 665 | 151.7     | -32.15   | 1983      | Barratta                         | Australia | 1852             | 755            | 0.41 | 1192.5           | Cornish (1993)                                                                         |
| 666 | 151.71    | -32.17   | 1977      | Bollygum                         | Australia | 1518             | 505            | 0.33 | 1282.8           | Cornish (1993)                                                                         |
| 667 | 151.71    | -32.17   | 1983      | Bollygum                         | Australia | 1732             | 820            | 0.47 | 1192.5           | Cornish (1993)                                                                         |
| 668 | -83.45    | 35.07    | 1942      | Coweeta 10                       | USA       | 1854             | 1047           | 0.56 | 984.4            | Johnson and Kovener (1956)                                                             |
| 669 | -83.45    | 35.07    | 1956      | Coweeta 10                       | USA       | 1854             | 1072           | 0.58 | 960.1            | Johnson and Kovener (1956)                                                             |
| 670 | -83.44    | 35.06    | 1963      | Coweeta 13                       | USA       | 1900             | 1076.5         | 0.57 | 935.4            | Swank and Helvey (1970)                                                                |
| 671 | -83.43    | 35.05    | 1942      | Coweeta 14                       | USA       | 1730             | 951            | 0.55 | 984.4            | Sun et al. (2005)                                                                      |
| 672 | -83.44    | 35.04    | 1941-1948 | Coweeta 19                       | USA       | 2032             | 1219           | 0.6  | 962.36           | Johnson and Kovener (1956)                                                             |
| 673 | -83.44    | 35.04    | 1949      | Coweeta 19                       | USA       | 2001             | 1222           | 0.61 | 910.6            | Johnson and Kovener (1956)                                                             |
| 674 | -83.45    | 35.04    |           | Coweeta 22                       | USA       | 2068             | 1275           | 0.62 | 936.45           | Bosch and<br>Hewlett(1982);Hewlett and<br>Hibbert (1961)                               |
| 675 | -83.47    | 35.04    |           | Coweeta 28                       | USA       | 2270             | 1532           | 0.67 | 936.45           | Bosch and<br>Hewlett(1982);Hewlett and<br>Douglass (1968);Douglass and<br>Swank (1976) |
| 676 | -83.47    | 35.05    |           | Coweeta 36                       | USA       | 2244             | 1515           | 0.68 | 936.45           | Swank and Helvey (1970)                                                                |
| 677 | -83.47    | 35.05    | 1963      | Coweeta 37                       | USA       | 2244             | 1583           | 0.71 | 935.4            | Swank and Helvey (1970);Swift<br>and Swank (1980)                                      |
| 678 | -83.46    | 35.06    | 1955      | Coweeta 41                       | USA       | 2029             | 1285           | 0.63 | 941.5            | Johnson and Kovener (1956)                                                             |
| 679 | -83.46    | 35.06    | 1956      | Coweeta 41                       | USA       | 2029             | 1340           | 0.66 | 960.1            | Johnson and Kovener (1956)                                                             |
| 680 | -120.74   | 39.01    |           | Placer County WsC                | USA       | 635              | 145            | 0.23 | 1260.56          | Lewis (1968);Burgy and<br>Papazaflriou(1971)                                           |
| 681 | -120.74   | 39.01    |           | Placer County WsC                | USA       | 635              | 220            | 0.35 | 1260.56          | Lewis (1968);Burgy and<br>Papazaflriou(1971)                                           |
| 682 | -72.37    | 42.33    | 1962      | the Lower_Upper Cadwell<br>Creek | USA       | 930              | 500            | 0.54 | 835.4            | Bent (2001)                                                                            |
| 683 | -72.37    | 42.33    | 1962      | the Lower_Upper Cadwell<br>Creek | USA       | 930              | 560            | 0.6  | 835.4            | Bent (2001)                                                                            |
| 684 | -72.37    | 42.33    | 1963      | the Lower_Upper Cadwell<br>Creek | USA       | 1100             | 550            | 0.5  | 909.6            | Bent (2001)                                                                            |
| 685 | -72.37    | 42.33    | 1963      | the Lower_Upper Cadwell<br>Creek | USA       | 1100             | 550            | 0.5  | 909.6            | Bent (2001)                                                                            |
| 686 | -72.37    | 42.33    | 1965      | the Lower_Upper Cadwell<br>Creek | USA       | 700              | 240            | 0.34 | 909.5            | Bent (2001)                                                                            |
| 687 | -72.37    | 42.33    | 1965      | the Lower_Upper Cadwell<br>Creek | USA       | 700              | 220            | 0.31 | 909.5            | Bent (2001)                                                                            |
| 688 | -72.37    | 42.33    | 1966      | the Lower_Upper Cadwell<br>Creek | USA       | 790              | 400            | 0.51 | 888              | Bent (2001)                                                                            |
| 689 | -72.37    | 42.33    | 1966      | the Lower_Upper Cadwell<br>Creek | USA       | 790              | 280            | 0.35 | 888              | Bent (2001)                                                                            |
| 690 | -72.37    | 42.33    | 1967      | the Lower_Upper Cadwell<br>Creek | USA       | 1100             | 700            | 0.64 | 826.5            | Bent (2001)                                                                            |
| 691 | -72.37    | 42.33    | 1967      | the Lower_Upper Cadwell<br>Creek | USA       | 1100             | 600            | 0.55 | 826.5            | Bent (2001)                                                                            |
| 692 | -72.37    | 42.33    | 1968      | the Lower_Upper Cadwell<br>Creek | USA       | 900              | 320            | 0.36 | 866.7            | Bent (2001)                                                                            |

| No  | Longitude | Latitude | Year      | Watershed                                    | Country      | PRE<br>(mm yr-1) | R<br>(mm yr-1) | R/P  | PET<br>(mm yr-1) | References             |
|-----|-----------|----------|-----------|----------------------------------------------|--------------|------------------|----------------|------|------------------|------------------------|
| 693 | -72.37    | 42.33    | 1968      | the Lower_Upper Cadwell Creek                | USA          | 900              | 360            | 0.4  | 866.7            | Bent (2001)            |
| 694 | -83.39    | 35.06    | 1939      | No.13 Southeastern Forest Experiment Station | USA          | 1239             | 650.3          | 0.52 | 970.8            | Kovner (1955)          |
| 695 | 149.48    | -36.68   | 1987      | Wicksend                                     | Australia    | 700              | 290            | 0.41 | 1267.3           | Lane and Mackay (2001) |
| 696 | 149.48    | -36.68   | 1989      | Wicksend                                     | Australia    | 1220             | 490            | 0.4  | 1234             | Lane and Mackay (2001) |
| 697 | 149.48    | -36.68   | 1991      | Wicksend                                     | Australia    | 1250             | 755            | 0.6  | 1291.7           | Lane and Mackay (2001) |
| 698 | 149.48    | -36.68   | 1991      | Ceb                                          | Australia    | 1305             | 690            | 0.53 | 1291.7           | Lane and Mackay (2001) |
| 699 | 149.48    | -36.68   | 1989      | Ceb                                          | Australia    | 1295             | 415            | 0.32 | 1234             | Lane and Mackay (2001) |
| 700 | -111.19   | 33.96    | 1955      | Sierra Experimental Forest                   | USA          | 813              | 48.26          | 0.06 | 1782.8           | Koestner et al. (2010) |
| 701 | -111.19   | 33.96    | 1958      | Sierra Experimental Forest                   | USA          | 813              | 66.04          | 0.08 | 1807.8           | Koestner et al. (2010) |
| 702 | -111.19   | 33.96    | 1966      | Sierra Experimental Forest                   | USA          | 813              | 203.2          | 0.25 | 1823.8           | Koestner et al. (2010) |
| 703 | 149.48    | -36.68   | 1987      | Willbob                                      | Australia    | 700              | 290            | 0.41 | 1267.3           | Lane and Mackay (2001) |
| 704 | 149.48    | -36.68   | 1989      | Willbob                                      | Australia    | 1225             | 490            | 0.4  | 1234             | Lane and Mackay (2001) |
| 705 | 30.56     | -25.27   | 1956-1971 | Mokobulaan B                                 | South Africa | 1127             | 217            | 0.19 | 1143.25          | Scott and Lesch (1997) |
| 706 | 30.56     | -25.26   | 1973      | Mokobulaan C                                 | South Africa | 1366             | 320            | 0.23 | 1115.7           | Scott and Lesch (1997) |
| 707 | 30.56     | -25.27   | 1973      | Mokobulaan B                                 | South Africa | 1312             | 392            | 0.3  | 1115.7           | Scott and Lesch (1997) |
| 708 | 30.56     | -25.26   | 1974      | Mokobulaan C                                 | South Africa | 1218             | 239            | 0.2  | 1113             | Scott and Lesch (1997) |
| 709 | 30.56     | -25.27   | 1974      | Mokobulaan B                                 | South Africa | 1174             | 208            | 0.18 | 1113             | Scott and Lesch (1997) |
| 710 | 30.56     | -25.26   | 1977      | Mokobulaan C                                 | South Africa | 1341             | 301            | 0.22 | 1149.9           | Scott and Lesch (1997) |
| 711 | 30.56     | -25.27   | 1977      | Mokobulaan B                                 | South Africa | 1281             | 209            | 0.16 | 1149.9           | Scott and Lesch (1997) |
| 712 | 30.56     | -25.26   | 1978      | Mokobulaan C                                 | South Africa | 1055             | 73             | 0.07 | 1125.1           | Scott and Lesch (1997) |
| 713 | 30.56     | -25.26   | 1979      | Mokobulaan C                                 | South Africa | 1083             | 97             | 0.09 | 1167.1           | Scott and Lesch (1997) |
| 714 | -82.27    | 35.76    | 1990      | Blue Mts no1                                 | USA          | 1355             | 472            | 0.35 | 944.1            | Stednick (1996)        |
| 715 | -82.27    | 35.76    | 1996      | Blue Mts no1                                 | USA          | 1355             | 720            | 0.53 | 847.9            | Stednick (1996)        |
| 716 | -93.25    | 35.55    |           | Ouachita no 18                               | USA          | 1317             | 676            | 0.51 | 1222.87          | Stednick (1996)        |
| 717 | -112.47   | 34.54    | 1990      | Willow creek AZ                              | USA          | 749              | 512            | 0.68 | 1731.2           | Stednick (1996)        |
| 718 | -112.47   | 34.54    | 1996      | Willow creek AZ                              | USA          | 749              | 608            | 0.81 | 1816.5           | Stednick (1996)        |
| 719 | -82.27    | 35.76    | 1990      | St Louis creek                               | USA          | 712              | 283            | 0.4  | 944.1            | Stednick (1996)        |
| 720 | -82.27    | 35.76    | 1996      | St Louis creek                               | USA          | 712              | 371            | 0.52 | 847.9            | Stednick (1996)        |
| 721 | -112.47   | 34.54    | 1990      | Thomas creek AZ                              | USA          | 768              | 500            | 0.65 | 1731.2           | Stednick (1996)        |
| 722 | -112.47   | 34.54    | 1996      | Thomas creek AZ                              | USA          | 768              | 570            | 0.74 | 1816.5           | Stednick (1996)        |
| 723 | 136.42    | 34.35    | 2007-2008 | M5 in central Mie Prefecture                 | Japan        | 1913             | 1131.6         | 0.59 | 898.8            | Dung et al. (2012)     |
| 724 | 136.42    | 34.35    | 2008-2009 | M5 in central Mie Prefecture                 | Japan        | 1551             | 825.5          | 0.53 | 884.3            | Dung et al. (2012)     |
| 725 | 173.07    | -41.37   | 1970      | C8 in Moutere                                | New Zealand  | 1115             | 693            | 0.62 | 779.3            | Duncan (1995)          |
| 726 | 173.07    | -41.37   | 1971      | C8 in Moutere                                | New Zealand  | 1006             | 525            | 0.52 | 785.1            | Duncan (1995)          |
