# Supplementary material for: Revisiting the hydrological basis of the Budyko framework with the principle of hydrologically similar groups
Source: Copernicus journal article supplement (doi:10.5194/hess-27-1929-2023), 2023-05-17
Supplement: Supplementary file 1 [file hess-27-1929-2023-supplement.zip › Supplement 2.pdf]

## Supplement 2: The results and performances of Decision Tree Regressor

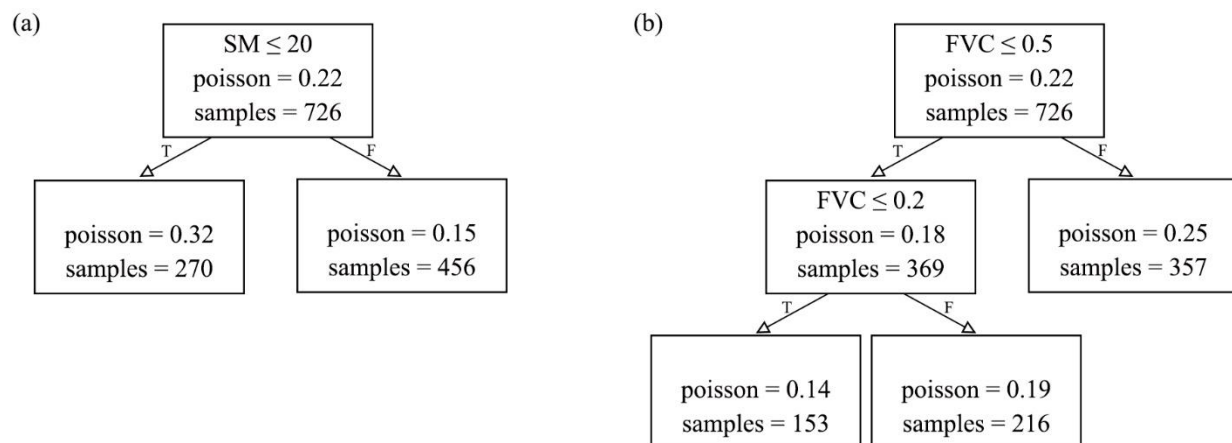

**Figure S.1** The results and performances of Decision Tree Regressor for (a) surface soil moisture (SM) and (b) fractional vegetation cover (FVC). The “poisson” indicates the value of Poisson deviance, “samples” indicates the number of samples, “T” means True, and “F” means Fales.
