# Supplementary material for: Revisiting the hydrological basis of the Budyko framework with the principle of hydrologically similar groups
Source: Copernicus journal article supplement (doi:10.5194/hess-27-1929-2023), 2023-05-17
Supplement: Supplementary file 1 [file hess-27-1929-2023-supplement.zip › Supplement 3.pdf]

### Supplement 3: The runoff simulation and verification results for each GRDC watershed

AREA-the drainage area (km<sup>2</sup>);

R\_GRDC-the average annual observed runoff from 2000 to 2016 (mm yr<sup>-1</sup>);

R\_PwM-the average annual simulated runoff by PwM from 2000 to 2016 (mm yr<sup>-1</sup>);

n- the length of time

| GRDC_NO | AREA  | Longitude | Latitude | R_GRDC  | R_PwM  | R <sup>2</sup> | NSE   | raBIAS | n  |
|---------|-------|-----------|----------|---------|--------|----------------|-------|--------|----|
| 6607855 | 53.7  | 0.18      | 51.11    | 485.44  | 289.95 | 0.81           | -0.82 | -0.40  | 17 |
| 6607560 | 87.8  | 0.08      | 50.95    | 450.62  | 232.86 | 0.85           | -0.90 | -0.48  | 17 |
| 6337503 | 103   | 8.73      | 51.38    | 524.96  | 398.44 | 0.85           | -0.51 | -0.24  | 17 |
| 4215090 | 117   | -119.32   | 49.25    | 215.50  | 118.32 | 0.27           | -1.88 | -0.45  | 17 |
| 6335300 | 141   | 9.34      | 49.23    | 298.31  | 385.17 | 0.65           | -1.47 | 0.29   | 17 |
| 6233550 | 164   | 16.29     | 62.66    | 341.89  | 303.56 | 0.93           | 0.77  | -0.11  | 17 |
| 6608240 | 178.7 | -3.12     | 51.53    | 1077.31 | 840.85 | 0.93           | -0.06 | -0.22  | 17 |
| 6934200 | 187   | 9.61      | 55.90    | 462.32  | 400.69 | 0.62           | 0.13  | -0.13  | 17 |
| 6606790 | 190.3 | 0.48      | 51.74    | 196.14  | 225.57 | 0.69           | 0.35  | 0.15   | 17 |
| 6606700 | 198   | 0.14      | 52.13    | 142.82  | 189.23 | 0.47           | -0.80 | 0.33   | 17 |
| 6457880 | 218   | 18.64     | 50.77    | 198.98  | 199.56 | 0.72           | -0.63 | 0.00   | 17 |
| 6606950 | 238.2 | 0.85      | 51.90    | 165.56  | 204.68 | 0.77           | 0.16  | 0.24   | 17 |
| 6604240 | 245.5 | -4.81     | 55.26    | 957.56  | 895.38 | 0.90           | 0.76  | -0.06  | 17 |
| 6457280 | 246   | 18.11     | 51.26    | 132.81  | 135.67 | 0.62           | -0.26 | 0.02   | 17 |
| 6233150 | 259.7 | 13.12     | 56.72    | 720.79  | 578.85 | 0.84           | -0.06 | -0.20  | 17 |
| 6935410 | 261   | 9.32      | 47.41    | 1207.28 | 954.02 | 0.83           | -1.81 | -0.21  | 17 |
| 1160220 | 265   | 19.29     | -32.78   | 151.45  | 14.11  | 0.66           | -2.35 | -0.91  | 17 |
| 1160720 | 299   | 30.10     | -29.50   | 209.55  | 145.24 | 0.54           | 0.04  | -0.31  | 17 |
| 6603310 | 304.3 | -6.51     | 54.76    | 889.34  | 776.17 | 0.90           | 0.20  | -0.13  | 17 |
| 6242420 | 305.9 | 15.57     | 48.44    | 201.12  | 283.42 | 0.70           | -0.42 | 0.41   | 17 |
| 4234550 | 321   | -79.38    | 45.67    | 585.45  | 555.10 | 0.64           | 0.60  | -0.05  | 17 |
| 1160710 | 358   | 30.15     | -29.44   | 184.30  | 138.89 | 0.20           | -1.38 | -0.25  | 17 |
| 6457260 | 360   | 17.74     | 52.24    | 72.08   | 113.79 | 0.58           | -0.98 | 0.58   | 17 |
| 6457380 | 395   | 16.59     | 52.57    | 66.82   | 158.13 | 0.29           | -8.28 | 1.37   | 17 |
| 4208861 | 425   | -111.73   | 55.18    | 152.45  | 106.44 | 0.30           | -1.34 | -0.30  | 17 |
| 6935320 | 443   | 7.74      | 46.97    | 875.37  | 804.38 | 0.88           | 0.69  | -0.08  | 17 |
| 6457290 | 447   | 18.08     | 51.65    | 113.93  | 149.99 | 0.62           | 0.05  | 0.32   | 17 |
| 4213350 | 453   | -108.13   | 49.71    | 33.82   | 27.33  | 0.00           | -0.78 | 0.32   | 17 |
| 6935402 | 493   | 9.07      | 47.41    | 1274.77 | 986.15 | 0.83           | -0.92 | -0.23  | 17 |
| 6233870 | 494.3 | 23.31     | 66.11    | 354.20  | 330.98 | 0.91           | 0.86  | -0.07  | 17 |
| 1196700 | 518   | 30.80     | -24.68   | 334.89  | 184.54 | 0.73           | -0.04 | -0.45  | 17 |
| 1160450 | 523   | 23.31     | -33.74   | 189.91  | 41.87  | 0.55           | -0.51 | -0.78  | 17 |
| 1160680 | 545   | 29.47     | -29.78   | 439.56  | 238.31 | 0.47           | -2.28 | -0.46  | 17 |
| 4231680 | 557   | -66.68    | 45.67    | 772.98  | 671.45 | 0.87           | 0.62  | -0.13  | 17 |
| 6605330 | 569.8 | -1.64     | 55.34    | 511.24  | 373.16 | 0.93           | -0.26 | -0.27  | 17 |
| 6606850 | 578   | 0.94      | 51.97    | 173.07  | 210.42 | 0.71           | -0.09 | 0.22   | 17 |
| 6457230 | 592   | 18.74     | 51.39    | 126.81  | 145.83 | 0.76           | 0.54  | 0.15   | 17 |
| 4146320 | 603.5 | -121.06   | 36.27    | 12.98   | 41.50  | 0.35           | -8.63 | 2.40   | 17 |
| 6140600 | 624   | 15.91     | 50.04    | 185.38  | 231.38 | 0.55           | -0.38 | 0.25   | 17 |
| 6229100 | 624.1 | 11.54     | 58.88    | 640.83  | 533.66 | 0.73           | 0.24  | -0.17  | 17 |

| GRDC_NO | AREA   | Longitude | Latitude | R_GRDC  | R_PwM  | R <sup>2</sup> | NSE    | raIBIAS | n  |
|---------|--------|-----------|----------|---------|--------|----------------|--------|---------|----|
| 4584200 | 639    | -77.76    | 18.08    | 1078.52 | 745.71 | 0.45           | -1.77  | -0.31   | 17 |
| 4220431 | 655    | -109.81   | 49.23    | 4.35    | 25.12  | 0.01           | -73.93 | 8.18    | 17 |
| 1160300 | 657    | 19.30     | -33.38   | 115.25  | 29.89  | 0.68           | -1.55  | -0.74   | 17 |
| 6457340 | 663    | 16.52     | 52.16    | 65.65   | 153.49 | 0.36           | -6.66  | 1.34    | 17 |
| 4231800 | 668    | -65.37    | 46.07    | 670.73  | 671.34 | 0.86           | 0.84   | 0.00    | 17 |
| 6934350 | 680    | 8.88      | 55.32    | 466.98  | 439.65 | 0.74           | 0.46   | -0.06   | 17 |
| 1160650 | 715    | 29.83     | -30.74   | 205.21  | 231.61 | 0.79           | 0.37   | 0.13    | 17 |
| 6246700 | 727.7  | 15.47     | 47.53    | 605.49  | 551.68 | 0.61           | 0.29   | -0.09   | 17 |
| 1160301 | 753    | 19.27     | -33.42   | 315.64  | 29.89  | 0.60           | -3.93  | -0.89   | 17 |
| 4123382 | 766.6  | -82.62    | 35.30    | 1024.71 | 900.35 | 0.82           | 0.62   | -0.12   | 17 |
| 6140500 | 791    | 15.28     | 50.64    | 625.14  | 465.49 | 0.47           | -1.14  | -0.26   | 17 |
| 6457240 | 811    | 18.98     | 51.47    | 157.83  | 157.29 | 0.61           | 0.36   | 0.00    | 17 |
| 4208465 | 819    | -118.49   | 58.59    | 83.49   | 85.10  | 0.29           | 0.23   | 0.05    | 17 |
| 6142640 | 827    | 18.91     | 49.06    | 376.21  | 383.24 | 0.62           | 0.40   | 0.02    | 17 |
| 6458203 | 836    | 19.51     | 49.87    | 488.42  | 407.92 | 0.90           | 0.56   | -0.16   | 17 |
| 4213050 | 859    | -114.93   | 52.27    | 173.70  | 187.81 | 0.39           | 0.30   | 0.08    | 17 |
| 4123335 | 903.9  | -79.62    | 39.07    | 805.74  | 681.01 | 0.85           | 0.25   | -0.15   | 17 |
| 1199100 | 910    | 30.59     | -26.28   | 45.58   | 78.22  | 0.63           | -0.56  | 0.72    | 17 |
| 6607130 | 916.9  | -4.22     | 50.53    | 796.19  | 740.40 | 0.93           | 0.84   | -0.07   | 17 |
| 4220300 | 928    | -105.71   | 48.99    | 23.18   | 15.19  | 0.06           | -0.45  | -0.33   | 17 |
| 6335125 | 954    | 8.03      | 48.39    | 732.19  | 712.89 | 0.83           | 0.81   | -0.03   | 17 |
| 6142551 | 955    | 18.79     | 49.30    | 512.34  | 453.34 | 0.71           | 0.14   | -0.12   | 17 |
| 4123083 | 968.7  | -83.36    | 36.85    | 651.66  | 617.47 | 0.87           | 0.83   | -0.05   | 17 |
| 6603320 | 970.2  | -6.74     | 54.41    | 625.68  | 615.69 | 0.90           | 0.89   | -0.02   | 17 |
| 6233800 | 1012   | 21.80     | 66.16    | 406.50  | 322.30 | 0.95           | 0.43   | -0.21   | 17 |
| 4123265 | 1012.7 | -81.71    | 38.18    | 487.66  | 552.09 | 0.82           | 0.48   | 0.13    | 17 |
| 4123275 | 1023.1 | -81.01    | 37.54    | 422.07  | 518.46 | 0.79           | 0.02   | 0.23    | 17 |
| 6934100 | 1040   | 8.72      | 55.95    | 501.49  | 424.79 | 0.49           | -1.23  | -0.15   | 17 |
| 1196300 | 1046   | 27.48     | -24.16   | 40.91   | 23.45  | 0.67           | 0.36   | -0.35   | 17 |
| 4147450 | 1046.4 | -72.19    | 41.71    | 635.02  | 503.56 | 0.85           | 0.41   | -0.21   | 17 |
| 4220502 | 1050   | -112.54   | 49.01    | 80.04   | 114.90 | 0.44           | -0.27  | 0.59    | 17 |
| 4134350 | 1077.4 | -84.71    | 43.63    | 297.76  | 239.37 | 0.50           | -1.63  | -0.20   | 17 |
| 6935401 | 1085   | 9.17      | 47.53    | 1078.67 | 918.10 | 0.83           | -0.12  | -0.15   | 17 |
| 6142680 | 1107   | 19.60     | 49.09    | 566.54  | 518.21 | 0.79           | 0.19   | -0.09   | 17 |
| 4208857 | 1110   | -112.46   | 55.20    | 98.55   | 97.27  | 0.06           | -0.08  | -0.01   | 17 |
| 4208750 | 1140   | -115.78   | 54.20    | 215.67  | 166.55 | 0.48           | 0.18   | -0.23   | 17 |
| 4235191 | 1160   | -82.01    | 42.65    | 333.47  | 350.13 | 0.56           | 0.47   | 0.05    | 17 |
| 4133100 | 1165.5 | -87.20    | 45.76    | 234.41  | 277.00 | 0.59           | 0.15   | 0.18    | 17 |
| 6337504 | 1202   | 8.90      | 51.16    | 458.60  | 369.93 | 0.79           | -0.20  | -0.19   | 17 |
| 4123240 | 1225.1 | -84.81    | 38.27    | 539.25  | 614.50 | 0.78           | 0.60   | 0.14    | 17 |
| 4123225 | 1232.8 | -86.23    | 38.24    | 583.66  | 539.53 | 0.76           | 0.55   | -0.08   | 17 |
| 6457320 | 1247   | 16.62     | 52.11    | 75.83   | 166.99 | 0.46           | -5.88  | 1.20    | 17 |
| 4244985 | 1250   | -64.59    | 44.45    | 935.83  | 877.31 | 0.85           | 0.75   | -0.06   | 17 |
| 2421500 | 1250   | 52.05     | 35.86    | 29.22   | 31.86  | 0.08           | -0.30  | 0.10    | 17 |
| 6457955 | 1255   | 18.16     | 51.31    | 127.09  | 138.90 | 0.72           | -0.59  | 0.09    | 17 |
| 6142300 | 1275   | 17.75     | 49.53    | 362.54  | 313.91 | 0.72           | 0.52   | -0.13   | 17 |

| GRDC_NO | AREA   | Longitude | Latitude | R_GRDC  | R_PwM   | R <sup>2</sup> | NSE    | raIBIAS | n  |
|---------|--------|-----------|----------|---------|---------|----------------|--------|---------|----|
| 6854301 | 1283   | 23.76     | 63.98    | 306.94  | 308.73  | 0.85           | 0.85   | 0.01    | 17 |
| 4123320 | 1284.6 | -80.54    | 40.68    | 391.98  | 464.85  | 0.86           | 0.55   | 0.19    | 17 |
| 6934250 | 1290   | 9.67      | 56.24    | 422.34  | 351.20  | 0.39           | -1.98  | -0.17   | 17 |
| 6233350 | 1332.7 | 16.16     | 57.01    | 233.62  | 231.66  | 0.70           | 0.59   | -0.01   | 17 |
| 4115224 | 1333.9 | -119.14   | 44.89    | 164.26  | 93.61   | 0.27           | -1.19  | -0.43   | 17 |
| 4213315 | 1350   | -115.08   | 52.66    | 155.10  | 163.29  | 0.36           | 0.18   | 0.05    | 17 |
| 4244960 | 1350   | -61.98    | 45.17    | 995.03  | 891.04  | 0.68           | 0.26   | -0.10   | 17 |
| 4123510 | 1351.9 | -85.15    | 39.59    | 444.29  | 507.24  | 0.60           | 0.11   | 0.14    | 17 |
| 6605565 | 1363   | -1.34     | 54.16    | 522.96  | 312.31  | 0.87           | -2.18  | -0.40   | 17 |
| 6594050 | 1376   | 35.63     | 33.05    | 263.77  | 22.02   | 0.64           | -3.52  | -0.92   | 17 |
| 4134500 | 1393.4 | -84.18    | 43.01    | 261.67  | 310.37  | 0.44           | -0.64  | 0.19    | 17 |
| 4220310 | 1400   | -105.41   | 49.00    | 5.03    | 19.61   | 0.30           | -5.08  | 2.91    | 17 |
| 6342520 | 1400   | 11.19     | 48.89    | 229.44  | 307.29  | 0.61           | -1.11  | 0.34    | 17 |
| 6341500 | 1403   | 13.31     | 53.79    | 121.99  | 172.56  | 0.37           | -4.06  | 0.41    | 17 |
| 6140450 | 1421   | 15.10     | 49.74    | 216.05  | 203.75  | 0.57           | 0.31   | -0.06   | 17 |
| 4150320 | 1421.9 | -97.45    | 29.22    | 72.58   | 123.33  | 0.63           | -1.38  | 0.73    | 17 |
| 4123351 | 1424.5 | -78.39    | 41.96    | 629.15  | 523.97  | 0.85           | 0.17   | -0.17   | 17 |
| 4213340 | 1430   | -108.48   | 49.85    | 28.06   | 45.59   | 0.11           | -2.80  | 0.66    | 17 |
| 4121126 | 1432.3 | -102.47   | 46.16    | 23.38   | 14.45   | 0.01           | -0.43  | -0.38   | 17 |
| 4231650 | 1450   | -66.61    | 46.13    | 862.02  | 724.19  | 0.78           | 0.33   | -0.16   | 17 |
| 6337505 | 1452   | 9.09      | 51.16    | 428.98  | 369.93  | 0.70           | -0.17  | -0.14   | 17 |
| 4208889 | 1460   | -111.56   | 57.19    | 105.92  | 74.27   | 0.44           | -0.10  | -0.30   | 17 |
| 6233700 | 1465.2 | 18.29     | 63.44    | 372.54  | 359.31  | 0.81           | 0.79   | -0.04   | 17 |
| 1160500 | 1479   | 26.08     | -33.33   | 5.09    | 34.17   | 0.43           | -35.77 | 5.71    | 17 |
| 4234600 | 1520   | -79.28    | 44.71    | 496.19  | 433.46  | 0.44           | 0.10   | -0.13   | 17 |
| 4213605 | 1520   | -99.33    | 49.11    | 61.61   | 54.05   | 0.01           | -0.65  | -0.07   | 17 |
| 4213172 | 1530   | -94.46    | 50.36    | 280.81  | 283.64  | 0.64           | 0.63   | 0.01    | 17 |
| 1160750 | 1546   | 30.25     | -29.07   | 126.68  | 151.24  | 0.63           | 0.20   | 0.19    | 17 |
| 4132300 | 1546.2 | -90.69    | 46.49    | 348.96  | 299.13  | 0.70           | 0.54   | -0.14   | 17 |
| 6142100 | 1559   | 16.98     | 49.76    | 305.64  | 280.95  | 0.52           | 0.08   | -0.08   | 17 |
| 4143710 | 1574.7 | -73.47    | 44.68    | 589.96  | 552.17  | 0.65           | 0.38   | -0.06   | 17 |
| 4213770 | 1580   | -96.43    | 50.09    | 208.48  | 205.34  | 0.44           | 0.40   | -0.01   | 17 |
| 4143500 | 1585   | -74.78    | 44.86    | 649.18  | 523.50  | 0.47           | -2.17  | -0.19   | 17 |
| 6605420 | 1586   | -0.89     | 54.02    | 369.55  | 400.25  | 0.80           | 0.28   | 0.08    | 17 |
| 6357502 | 1621   | 15.00     | 51.16    | 292.86  | 305.23  | 0.68           | 0.59   | 0.04    | 17 |
| 3650221 | 1663   | -46.64    | -1.77    | 1354.48 | 1311.08 | 0.71           | 0.59   | -0.03   | 17 |
| 4123235 | 1683.5 | -84.28    | 39.87    | 397.35  | 460.94  | 0.68           | 0.38   | 0.16    | 17 |
| 4208983 | 1690   | -109.79   | 58.32    | 167.25  | 109.70  | 0.11           | -3.22  | -0.34   | 17 |
| 6935400 | 1696   | 8.67      | 47.60    | 867.90  | 823.35  | 0.87           | 0.76   | -0.05   | 17 |
| 6604201 | 1704.2 | -4.07     | 55.80    | 880.77  | 693.29  | 0.94           | -0.11  | -0.21   | 17 |
| 4213435 | 1720   | -97.51    | 51.36    | 161.31  | 134.38  | 0.12           | 0.06   | -0.17   | 17 |
| 1160700 | 1744   | 29.90     | -29.75   | 306.18  | 164.04  | 0.67           | -1.11  | -0.46   | 17 |
| 4135500 | 1774.2 | -81.23    | 41.72    | 533.09  | 558.36  | 0.77           | 0.74   | 0.05    | 17 |
| 4143770 | 1776.7 | -73.08    | 44.68    | 728.53  | 732.91  | 0.75           | 0.70   | 0.01    | 17 |
| 4147475 | 1784.5 | -72.51    | 42.16    | 493.32  | 546.40  | 0.82           | 0.60   | 0.11    | 17 |
| 4151300 | 1784.5 | -104.06   | 32.02    | 5.25    | 6.89    | 0.03           | -0.53  | 0.43    | 17 |

| GRDC_NO | AREA    | Longitude | Latitude | R_GRDC  | R_PwM  | R <sup>2</sup> | NSE   | raIBIAS | n  |
|---------|---------|-----------|----------|---------|--------|----------------|-------|---------|----|
| 6545300 | 1841.9  | 15.18     | 46.09    | 652.32  | 604.28 | 0.90           | 0.80  | -0.07   | 17 |
| 6603120 | 1843.8  | -7.46     | 54.81    | 1026.25 | 782.48 | 0.94           | -0.92 | -0.24   | 17 |
| 4220402 | 1850    | -109.52   | 49.29    | 13.61   | 20.31  | 0.02           | -1.37 | 0.52    | 17 |
| 4213835 | 1860    | -115.43   | 52.36    | 250.32  | 233.30 | 0.31           | 0.19  | -0.07   | 17 |
| 4123341 | 1870    | -79.68    | 39.12    | 875.50  | 681.01 | 0.85           | -0.49 | -0.22   | 17 |
| 4148125 | 1898.5  | -77.58    | 35.43    | 348.13  | 352.45 | 0.64           | 0.64  | 0.01    | 17 |
| 4208770 | 1900    | -115.41   | 55.32    | 204.52  | 225.62 | 0.71           | 0.65  | 0.10    | 17 |
| 4135300 | 1901.1  | -82.91    | 42.60    | 317.95  | 319.23 | 0.54           | 0.38  | 0.00    | 17 |
| 4152500 | 1908.8  | -110.11   | 31.38    | 15.91   | 18.67  | 0.44           | 0.26  | 0.40    | 17 |
| 4213530 | 1920    | -102.07   | 52.00    | 142.41  | 114.72 | 0.40           | 0.17  | -0.19   | 17 |
| 6335290 | 1929    | 9.28      | 49.26    | 374.81  | 394.64 | 0.77           | 0.55  | 0.05    | 17 |
| 4146200 | 1929.5  | -123.33   | 39.71    | 623.25  | 346.95 | 0.80           | -0.27 | -0.44   | 17 |
| 3652010 | 1960    | -37.20    | -10.68   | 46.27   | 36.71  | 0.04           | -0.89 | -0.21   | 17 |
| 4213131 | 1980    | -113.88   | 50.60    | 189.36  | 143.78 | 0.73           | 0.51  | -0.24   | 17 |
| 4213540 | 2000    | -101.32   | 50.96    | 73.11   | 99.18  | 0.15           | -1.65 | 0.36    | 17 |
| 4208610 | 2010    | -117.67   | 56.52    | 70.99   | 115.56 | 0.24           | -3.51 | 0.66    | 17 |
| 4123135 | 2043.5  | -86.26    | 40.78    | 368.18  | 414.98 | 0.48           | -0.28 | 0.13    | 17 |
| 6854590 | 2045    | 29.57     | 64.21    | 421.38  | 333.42 | 0.88           | 0.00  | -0.21   | 17 |
| 4147502 | 2051.3  | -73.99    | 43.70    | 767.36  | 648.64 | 0.77           | 0.11  | -0.15   | 17 |
| 4122170 | 2051.3  | -95.82    | 40.39    | 142.97  | 187.59 | 0.69           | 0.44  | 0.31    | 17 |
| 4146130 | 2053.8  | -122.59   | 41.82    | 67.00   | 42.65  | 0.29           | -1.35 | -0.36   | 17 |
| 4125918 | 2053.9  | -91.20    | 36.64    | 348.53  | 474.61 | 0.42           | -1.19 | 0.36    | 17 |
| 4147463 | 2069.4  | -71.63    | 44.75    | 762.78  | 656.11 | 0.77           | -0.30 | -0.14   | 17 |
| 6142520 | 2094    | 18.17     | 48.53    | 203.71  | 289.72 | 0.55           | -2.25 | 0.42    | 17 |
| 3650930 | 2100    | -35.96    | -8.28    | 32.77   | 105.28 | 0.59           | -8.99 | 2.54    | 17 |
| 4213265 | 2110    | -101.15   | 52.26    | 124.86  | 100.99 | 0.55           | 0.42  | -0.19   | 17 |
| 3651520 | 2111    | -44.51    | -14.43   | 104.15  | 107.71 | 0.28           | -5.66 | 0.03    | 17 |
| 4147721 | 2113.4  | -78.02    | 40.49    | 463.30  | 452.04 | 0.88           | 0.84  | -0.02   | 17 |
| 4147905 | 2116    | -77.36    | 39.41    | 427.01  | 459.15 | 0.77           | 0.67  | 0.08    | 17 |
| 4150515 | 2118.6  | -98.03    | 31.09    | 70.40   | 133.71 | 0.56           | -0.65 | 0.90    | 17 |
| 4133651 | 2134.2  | -85.20    | 42.32    | 322.16  | 316.35 | 0.24           | -0.94 | -0.02   | 17 |
| 6233100 | 2160.2  | 12.31     | 57.24    | 606.70  | 469.06 | 0.79           | -0.15 | -0.23   | 17 |
| 6457990 | 2163    | 14.81     | 53.56    | 188.55  | 182.91 | 0.18           | -0.25 | -0.03   | 17 |
| 4150315 | 2170.4  | -97.65    | 29.66    | 199.58  | 232.99 | 0.77           | 0.58  | 0.17    | 17 |
| 6605300 | 2175.6  | -1.94     | 54.95    | 691.17  | 613.62 | 0.92           | 0.62  | -0.11   | 17 |
| 4119288 | 2185.9  | -93.80    | 42.44    | 269.31  | 227.81 | 0.75           | 0.65  | -0.15   | 17 |
| 4208480 | 2200    | -122.36   | 56.46    | 322.61  | 179.56 | 0.39           | -3.68 | -0.44   | 17 |
| 4220401 | 2210    | -109.47   | 49.16    | 10.75   | 20.31  | 0.01           | -2.13 | 0.94    | 17 |
| 6609400 | 2210    | -1.94     | 52.09    | 253.84  | 306.72 | 0.82           | 0.19  | 0.21    | 17 |
| 4123136 | 2217    | -86.57    | 41.16    | 365.85  | 361.85 | 0.28           | -0.19 | -0.01   | 17 |
| 4203220 | 2220    | -139.64   | 63.76    | 110.86  | 93.31  | 0.41           | -0.56 | -0.15   | 17 |
| 4123200 | 2222.2  | -86.02    | 40.04    | 436.56  | 485.67 | 0.65           | 0.44  | 0.11    | 17 |
| 4213060 | 2230    | -114.86   | 52.25    | 256.17  | 264.40 | 0.70           | 0.69  | 0.03    | 17 |
| 4231621 | 2230    | -67.21    | 47.17    | 733.70  | 716.47 | 0.90           | 0.89  | -0.02   | 17 |
| 6545200 | 2238.12 | 15.46     | 45.87    | 720.18  | 718.94 | 0.91           | 0.91  | 0.00    | 17 |
| 4121350 | 2255.9  | -95.78    | 41.64    | 205.68  | 229.10 | 0.66           | 0.60  | 0.11    | 17 |

| GRDC_NO | AREA   | Longitude | Latitude | R_GRDC | R_PwM  | R <sup>2</sup> | NSE     | raIBIAS | n  |
|---------|--------|-----------|----------|--------|--------|----------------|---------|---------|----|
| 3649440 | 2259   | -50.99    | -16.49   | 481.48 | 394.38 | 0.11           | -0.54   | -0.18   | 17 |
| 4244840 | 2270   | -66.89    | 47.83    | 594.67 | 581.59 | 0.51           | 0.38    | -0.02   | 17 |
| 4151651 | 2271.4 | -106.73   | 36.58    | 154.19 | 26.89  | 0.02           | -13.83  | -0.83   | 17 |
| 4213840 | 2280   | -93.45    | 57.02    | 203.56 | 165.26 | 0.70           | 0.34    | -0.19   | 17 |
| 4149415 | 2292.2 | -86.98    | 33.71    | 541.97 | 566.65 | 0.81           | 0.76    | 0.05    | 17 |
| 4121330 | 2294.7 | -96.31    | 42.58    | 149.62 | 149.36 | 0.54           | 0.53    | 0.00    | 17 |
| 4116340 | 2318.1 | -113.64   | 44.94    | 84.11  | 8.36   | 0.05           | -12.75  | -0.90   | 17 |
| 4214295 | 2330   | -109.39   | 55.71    | 130.14 | 116.72 | 0.00           | -0.85   | -0.10   | 17 |
| 4119295 | 2338.8 | -90.99    | 39.01    | 294.51 | 363.46 | 0.80           | 0.62    | 0.23    | 17 |
| 4123330 | 2367.3 | -80.04    | 39.15    | 741.53 | 769.14 | 0.92           | 0.88    | 0.04    | 17 |
| 4115290 | 2393.2 | -120.01   | 47.84    | 772.30 | 507.83 | 0.19           | -3.33   | -0.34   | 17 |
| 1159601 | 2397   | 26.35     | -31.00   | 13.16  | 20.15  | 0.77           | 0.59    | 0.54    | 17 |
| 6233400 | 2428.2 | 15.39     | 63.52    | 439.05 | 322.61 | 0.69           | -0.74   | -0.27   | 17 |
| 4113420 | 2432   | -101.57   | 48.37    | 15.04  | 28.87  | 0.01           | -0.80   | 0.94    | 17 |
| 4123280 | 2442.4 | -82.09    | 39.33    | 387.71 | 446.39 | 0.78           | 0.55    | 0.15    | 17 |
| 6458924 | 2462   | 21.71     | 52.50    | 134.25 | 170.27 | 0.54           | -0.84   | 0.27    | 17 |
| 4125010 | 2483.8 | -94.92    | 35.92    | 360.72 | 354.87 | 0.78           | 0.77    | -0.02   | 17 |
| 4151400 | 2494.2 | -104.74   | 33.29    | 7.54   | 17.34  | 0.81           | -63.41  | 7.72    | 17 |
| 4122111 | 2501.9 | -100.53   | 41.78    | 80.40  | 67.74  | 0.03           | -178.86 | -0.16   | 17 |
| 4150510 | 2507.1 | -97.56    | 31.79    | 91.98  | 131.43 | 0.60           | 0.28    | 0.44    | 17 |
| 6337508 | 2523   | 9.72      | 51.00    | 261.05 | 314.48 | 0.68           | -0.61   | 0.20    | 17 |
| 1160600 | 2530   | 27.39     | -33.19   | 55.24  | 65.39  | 0.57           | 0.15    | 0.18    | 17 |
| 4122212 | 2548.6 | -98.07    | 40.34    | 37.34  | 68.35  | 0.47           | -8.27   | 0.83    | 17 |
| 4143310 | 2553.7 | -75.38    | 44.60    | 659.64 | 550.14 | 0.79           | -0.26   | -0.17   | 17 |
| 4208940 | 2560   | -116.63   | 53.47    | 216.49 | 221.68 | 0.61           | 0.54    | 0.02    | 17 |
| 4115344 | 2577.1 | -112.74   | 46.40    | 80.34  | 27.57  | 0.15           | -3.63   | -0.66   | 17 |
| 4147491 | 2580   | -73.49    | 41.65    | 652.04 | 603.45 | 0.87           | 0.80    | -0.07   | 17 |
| 4220400 | 2580   | -109.42   | 49.01    | 9.85   | 20.31  | 0.00           | -2.11   | 1.13    | 17 |
| 6457220 | 2597   | 16.84     | 52.67    | 83.26  | 147.46 | 0.34           | -3.83   | 0.77    | 17 |
| 4119230 | 2597.8 | -90.16    | 41.49    | 274.15 | 369.62 | 0.64           | 0.12    | 0.35    | 17 |
| 4208445 | 2610   | -117.19   | 59.58    | 101.72 | 70.52  | 0.37           | 0.03    | -0.30   | 17 |
| 4119050 | 2615.9 | -94.88    | 46.64    | 158.75 | 118.66 | 0.11           | -5.53   | -0.25   | 17 |
| 4236700 | 2620   | -77.42    | 44.25    | 370.15 | 382.56 | 0.74           | 0.50    | 0.03    | 17 |
| 4152652 | 2621.1 | -106.94   | 38.54    | 204.18 | 40.85  | 0.09           | -5.91   | -0.80   | 17 |
| 4122105 | 2628.9 | -96.52    | 41.71    | 127.35 | 132.51 | 0.36           | 0.14    | 0.04    | 17 |
| 4213557 | 2630   | -99.90    | 50.36    | 79.80  | 101.90 | 0.15           | -0.47   | 0.28    | 17 |
| 4123355 | 2662.5 | -79.96    | 41.44    | 713.72 | 567.59 | 0.82           | -0.28   | -0.20   | 17 |
| 4135100 | 2698.8 | -83.53    | 41.96    | 278.62 | 281.91 | 0.34           | 0.05    | 0.01    | 17 |
| 4208843 | 2700   | -111.25   | 58.36    | 214.92 | 116.20 | 0.28           | -12.31  | -0.46   | 17 |
| 4115451 | 2716.9 | -114.14   | 45.97    | 273.46 | 49.95  | 0.34           | -9.36   | -0.82   | 17 |
| 4122620 | 2719.5 | -96.46    | 40.97    | 121.30 | 160.96 | 0.66           | 0.06    | 0.33    | 17 |
| 4220501 | 2720   | -112.08   | 49.14    | 105.31 | 72.13  | 0.45           | -5.64   | -0.32   | 17 |
| 4119263 | 2729.9 | -92.67    | 43.06    | 300.51 | 250.99 | 0.43           | 0.24    | -0.16   | 17 |
| 4147505 | 2732.5 | -73.87    | 43.31    | 760.31 | 674.64 | 0.69           | 0.22    | -0.11   | 17 |
| 4119321 | 2776.5 | -90.28    | 40.71    | 275.31 | 369.38 | 0.61           | 0.10    | 0.34    | 17 |
| 4126301 | 2815.3 | -95.91    | 34.27    | 243.40 | 237.66 | 0.79           | 0.78    | -0.02   | 17 |

| GRDC_NO | AREA   | Longitude | Latitude | R_GRDC | R_PwM  | R <sup>2</sup> | NSE    | raIBIAS | n  |
|---------|--------|-----------|----------|--------|--------|----------------|--------|---------|----|
| 6338120 | 2842   | 7.60      | 52.10    | 275.05 | 322.14 | 0.75           | -0.42  | 0.17    | 17 |
| 4119220 | 2846.4 | -89.00    | 42.20    | 298.33 | 389.57 | 0.68           | 0.04   | 0.31    | 17 |
| 4125075 | 2864.5 | -102.96   | 36.93    | 7.98   | 12.29  | 0.01           | -16.06 | 4.10    | 17 |
| 4119090 | 2874.9 | -94.04    | 44.11    | 254.32 | 242.16 | 0.26           | 0.14   | -0.05   | 17 |
| 4122260 | 2900.8 | -93.20    | 38.99    | 288.59 | 357.39 | 0.78           | 0.59   | 0.24    | 17 |
| 6140300 | 2913   | 14.14     | 49.31    | 271.25 | 246.20 | 0.76           | 0.69   | -0.09   | 17 |
| 4120322 | 2913.8 | -109.84   | 46.43    | 33.09  | 29.42  | 0.28           | 0.22   | -0.11   | 17 |
| 4123110 | 2929.3 | -88.30    | 38.64    | 379.36 | 474.67 | 0.54           | -0.16  | 0.25    | 17 |
| 4123278 | 2929.3 | -80.98    | 36.65    | 555.16 | 487.51 | 0.57           | 0.43   | -0.12   | 17 |
| 4125917 | 2937   | -91.11    | 36.35    | 369.81 | 474.61 | 0.47           | -0.47  | 0.28    | 17 |
| 4147650 | 2970.7 | -75.65    | 40.24    | 629.22 | 569.85 | 0.92           | 0.81   | -0.09   | 17 |
| 6337506 | 2975   | 9.50      | 51.19    | 253.73 | 314.48 | 0.64           | -1.30  | 0.24    | 17 |
| 4232600 | 2980   | -88.38    | 48.91    | 266.25 | 294.57 | 0.65           | 0.12   | 0.11    | 17 |
| 4125020 | 3014.8 | -94.56    | 37.24    | 298.69 | 413.53 | 0.81           | 0.41   | 0.38    | 17 |
| 4208858 | 3080   | -111.86   | 55.01    | 80.73  | 106.44 | 0.34           | -0.86  | 0.32    | 17 |
| 6854620 | 3109   | 25.09     | 65.69    | 445.28 | 340.45 | 0.82           | 0.21   | -0.24   | 17 |
| 4244850 | 3160   | -67.49    | 47.66    | 718.79 | 601.85 | 0.66           | -0.05  | -0.16   | 17 |
| 3650370 | 3180   | -43.95    | -4.50    | 312.73 | 438.70 | 0.62           | 0.15   | 0.40    | 17 |
| 6340700 | 3184   | 13.40     | 51.52    | 125.99 | 230.43 | 0.38           | -3.92  | 0.83    | 17 |
| 4121111 | 3185.7 | -102.06   | 47.16    | 22.84  | 24.30  | 0.42           | 0.29   | 0.06    | 17 |
| 4133751 | 3185.7 | -84.56    | 42.75    | 287.18 | 251.89 | 0.30           | -0.51  | -0.12   | 17 |
| 3650620 | 3200   | -38.99    | -7.30    | 41.32  | 86.91  | 0.47           | -4.95  | 2.62    | 17 |
| 4120960 | 3203.4 | -105.35   | 44.93    | 5.92   | 16.02  | 0.16           | -7.05  | 1.74    | 17 |
| 4121431 | 3211.6 | -102.31   | 46.74    | 27.37  | 13.53  | 0.10           | -0.18  | -0.51   | 17 |
| 4125943 | 3224.6 | -90.39    | 36.76    | 418.78 | 499.03 | 0.62           | 0.08   | 0.19    | 17 |
| 4122270 | 3237.5 | -95.27    | 38.62    | 178.95 | 242.80 | 0.80           | 0.53   | 0.36    | 17 |
| 4119318 | 3240   | -88.93    | 41.21    | 284.57 | 367.67 | 0.59           | 0.09   | 0.29    | 17 |
| 4135210 | 3240.1 | -83.16    | 41.31    | 384.28 | 375.95 | 0.60           | 0.59   | -0.02   | 17 |
| 6213800 | 3253   | -2.58     | 40.70    | 122.52 | 67.58  | 0.23           | -1.06  | -0.45   | 17 |
| 1196600 | 3256   | 29.26     | -26.01   | 50.36  | 58.33  | 0.68           | 0.57   | 0.20    | 17 |
| 6605570 | 3315   | -1.14     | 53.99    | 535.67 | 434.93 | 0.92           | 0.26   | -0.19   | 17 |
| 4213815 | 3350   | -101.11   | 53.15    | 156.36 | 127.77 | 0.79           | 0.66   | -0.18   | 17 |
| 4116480 | 3354.1 | -112.47   | 43.13    | 24.44  | 43.34  | 0.01           | -10.19 | 0.78    | 17 |
| 4123245 | 3364.4 | -85.71    | 37.77    | 505.38 | 642.46 | 0.84           | 0.14   | 0.27    | 17 |
| 4115231 | 3369.6 | -120.43   | 47.50    | 812.60 | 453.93 | 0.29           | -5.70  | -0.44   | 17 |
| 4120301 | 3385.1 | -111.55   | 47.93    | 13.61  | 10.44  | 0.10           | -0.27  | -0.22   | 17 |
| 4119283 | 3387.7 | -94.19    | 42.73    | 221.39 | 173.95 | 0.40           | 0.15   | -0.21   | 17 |
| 4151805 | 3418.8 | -106.47   | 37.68    | 198.80 | 52.91  | 0.41           | -5.90  | -0.73   | 17 |
| 4119210 | 3434.3 | -89.62    | 42.31    | 314.75 | 413.82 | 0.70           | -0.12  | 0.31    | 17 |
| 4122165 | 3434.3 | -95.58    | 40.87    | 230.01 | 251.86 | 0.72           | 0.69   | 0.10    | 17 |
| 4125810 | 3436.9 | -97.39    | 37.84    | 83.69  | 77.91  | 0.39           | -0.14  | -0.07   | 17 |
| 4146210 | 3465.4 | -122.92   | 38.51    | 449.69 | 177.83 | 0.50           | -1.11  | -0.60   | 17 |
| 4122180 | 3468   | -95.60    | 40.04    | 122.53 | 164.91 | 0.79           | 0.49   | 0.35    | 17 |
| 4213140 | 3470   | -105.40   | 50.40    | 27.63  | 20.29  | 0.03           | -0.28  | -0.25   | 17 |
| 4133250 | 3470.6 | -88.95    | 43.95    | 317.74 | 329.34 | 0.65           | 0.49   | 0.04    | 17 |
| 4132800 | 3470.6 | -89.21    | 46.72    | 307.04 | 360.02 | 0.56           | -0.30  | 0.17    | 17 |

| GRDC_NO | AREA   | Longitude | Latitude | R_GRDC | R_PwM  | R <sup>2</sup> | NSE    | raIBIAS | n  |
|---------|--------|-----------|----------|--------|--------|----------------|--------|---------|----|
| 4119313 | 3501.7 | -86.97    | 41.22    | 363.60 | 390.90 | 0.23           | -0.46  | 0.08    | 17 |
| 4147111 | 3525   | -71.19    | 44.44    | 713.00 | 620.09 | 0.80           | 0.17   | -0.13   | 17 |
| 4213111 | 3530   | -112.84   | 49.57    | 118.05 | 85.85  | 0.52           | 0.34   | -0.27   | 17 |
| 4148325 | 3553.5 | -80.18    | 35.15    | 268.96 | 413.47 | 0.70           | -0.58  | 0.54    | 17 |
| 6458863 | 3561   | 21.79     | 53.39    | 166.11 | 225.94 | 0.14           | -4.92  | 0.36    | 17 |
| 4208580 | 3570   | -120.57   | 55.96    | 92.15  | 161.53 | 0.41           | -1.45  | 0.75    | 17 |
| 6335350 | 3571   | 8.35      | 50.55    | 287.16 | 361.68 | 0.81           | -0.70  | 0.26    | 17 |
| 4113315 | 3574.2 | -96.27    | 47.89    | 96.76  | 99.56  | 0.25           | -0.97  | 0.03    | 17 |
| 4213900 | 3580   | -113.01   | 51.29    | 28.77  | 43.91  | 0.39           | -1.23  | 0.53    | 17 |
| 4207100 | 3600   | -125.01   | 54.01    | 182.33 | 160.62 | 0.28           | 0.21   | -0.12   | 17 |
| 6233250 | 3664.5 | 14.13     | 56.11    | 306.55 | 318.00 | 0.77           | 0.72   | 0.04    | 17 |
| 4148070 | 3680.4 | -77.16    | 36.77    | 304.80 | 436.36 | 0.81           | 0.07   | 0.43    | 17 |
| 4213780 | 3700   | -95.96    | 49.94    | 170.71 | 221.51 | 0.61           | 0.06   | 0.30    | 17 |
| 4122154 | 3706.3 | -106.35   | 40.93    | 96.81  | 17.85  | 0.00           | -2.28  | -0.82   | 17 |
| 4133701 | 3711.5 | -85.26    | 43.90    | 260.71 | 221.52 | 0.45           | -1.05  | -0.15   | 17 |
| 3650511 | 3720   | -40.82    | -3.11    | 205.93 | 128.46 | 0.79           | 0.71   | -0.12   | 17 |
| 4213021 | 3720   | -111.59   | 50.86    | 5.28   | 8.24   | 0.00           | -1.97  | 0.57    | 17 |
| 4121162 | 3729.6 | -102.84   | 43.02    | 10.63  | 6.99   | 0.08           | -0.17  | -0.33   | 17 |
| 4213341 | 3730   | -107.66   | 50.50    | 15.22  | 16.13  | 0.00           | -1.20  | 0.06    | 17 |
| 4208245 | 3740   | -126.46   | 59.66    | 236.98 | 166.92 | 0.31           | -2.76  | -0.30   | 17 |
| 6338130 | 3740   | 7.44      | 52.29    | 288.64 | 322.14 | 0.77           | -0.26  | 0.12    | 17 |
| 4118105 | 3755.5 | -119.25   | 39.30    | 63.78  | 4.73   | 0.35           | -1.41  | -0.93   | 17 |
| 4133801 | 3758.1 | -85.95    | 44.26    | 417.30 | 240.91 | 0.11           | -21.38 | -0.42   | 17 |
| 6233780 | 3780.8 | 21.96     | 66.02    | 405.80 | 334.20 | 0.94           | 0.45   | -0.18   | 17 |
| 4113340 | 3833.2 | -97.05    | 46.91    | 51.88  | 84.55  | 0.17           | -0.43  | 0.63    | 17 |
| 4127150 | 3833.2 | -88.98    | 35.28    | 494.93 | 598.76 | 0.90           | 0.42   | 0.21    | 17 |
| 4147710 | 3841   | -75.85    | 42.22    | 650.16 | 620.89 | 0.84           | 0.78   | -0.05   | 17 |
| 4147903 | 3848.7 | -78.65    | 39.45    | 316.67 | 389.62 | 0.86           | 0.31   | 0.23    | 17 |
| 4123137 | 3926.4 | -88.02    | 38.94    | 338.46 | 384.02 | 0.45           | 0.30   | 0.13    | 17 |
| 4119252 | 3967.9 | -92.91    | 42.06    | 289.45 | 232.78 | 0.79           | 0.58   | -0.20   | 17 |
| 4213134 | 3990   | -113.82   | 50.79    | 161.75 | 161.59 | 0.80           | 0.79   | 0.00    | 17 |
| 6335602 | 3995   | 9.42      | 48.71    | 398.08 | 482.42 | 0.77           | -0.45  | 0.21    | 17 |
| 4147490 | 3999   | -73.17    | 41.39    | 651.51 | 581.68 | 0.88           | 0.75   | -0.11   | 17 |
| 4119150 | 4001.6 | -91.26    | 42.74    | 303.49 | 305.63 | 0.76           | 0.75   | 0.01    | 17 |
| 6608501 | 4010   | -2.69     | 51.79    | 595.37 | 534.11 | 0.95           | 0.78   | -0.10   | 17 |
| 6335115 | 4013   | 7.91      | 49.91    | 230.18 | 269.19 | 0.75           | 0.37   | 0.17    | 17 |
| 4119510 | 4022.3 | -90.63    | 42.09    | 323.05 | 402.22 | 0.70           | 0.30   | 0.25    | 17 |
| 4146145 | 4053.4 | -121.85   | 42.59    | 100.36 | 17.42  | 0.00           | -5.50  | -0.83   | 17 |
| 6357501 | 4125   | 14.71     | 51.97    | 202.18 | 196.19 | 0.42           | 0.05   | -0.03   | 17 |
| 4147950 | 4133.6 | -77.53    | 38.31    | 361.81 | 418.98 | 0.81           | 0.65   | 0.16    | 17 |
| 1159900 | 4152   | 29.24     | -27.17   | 57.99  | 52.64  | 0.65           | 0.64   | -0.09   | 17 |
| 4123082 | 4162.1 | -84.16    | 36.74    | 571.86 | 647.90 | 0.89           | 0.74   | 0.13    | 17 |
| 4123350 | 4164.7 | -78.71    | 42.16    | 601.44 | 521.20 | 0.85           | 0.36   | -0.13   | 17 |
| 4119286 | 4193.2 | -94.38    | 41.99    | 227.89 | 178.51 | 0.74           | 0.52   | -0.22   | 17 |
| 4123270 | 4193.2 | -80.81    | 37.64    | 499.89 | 471.82 | 0.86           | 0.81   | -0.06   | 17 |
| 4120210 | 4203.6 | -109.23   | 48.65    | 7.51   | 16.47  | 0.00           | -1.02  | 1.25    | 17 |

| GRDC_NO | AREA   | Longitude | Latitude | R_GRDC | R_PwM  | R <sup>2</sup> | NSE    | raIBIAS | n  |
|---------|--------|-----------|----------|--------|--------|----------------|--------|---------|----|
| 4213531 | 4230   | -101.06   | 52.20    | 110.93 | 85.64  | 0.26           | -0.11  | -0.23   | 17 |
| 6144300 | 4232   | 21.35     | 48.61    | 231.54 | 285.35 | 0.85           | 0.44   | 0.23    | 17 |
| 4119271 | 4234.7 | -92.66    | 41.36    | 297.83 | 280.08 | 0.92           | 0.85   | -0.06   | 17 |
| 4119322 | 4236.7 | -90.34    | 40.49    | 279.71 | 369.38 | 0.64           | 0.24   | 0.32    | 17 |
| 4214280 | 4250   | -95.67    | 57.66    | 218.94 | 146.05 | 0.44           | -0.48  | -0.33   | 17 |
| 6335800 | 4251   | 10.87     | 49.95    | 330.05 | 343.82 | 0.70           | 0.45   | 0.04    | 17 |
| 4119442 | 4273.5 | -91.26    | 45.45    | 321.95 | 381.20 | 0.70           | 0.09   | 0.18    | 17 |
| 6854320 | 4283   | 24.38     | 64.34    | 303.74 | 275.31 | 0.87           | 0.74   | -0.09   | 17 |
| 4115250 | 4291.6 | -118.73   | 46.03    | 122.58 | 41.21  | 0.29           | -4.38  | -0.66   | 17 |
| 4119262 | 4302   | -92.46    | 42.65    | 312.29 | 250.99 | 0.52           | 0.29   | -0.20   | 17 |
| 6337512 | 4302   | 10.20     | 51.12    | 288.19 | 304.42 | 0.52           | -0.53  | 0.06    | 17 |
| 6457956 | 4304   | 17.94     | 51.91    | 111.67 | 132.35 | 0.74           | 0.20   | 0.19    | 17 |
| 4125911 | 4317.5 | -91.01    | 36.99    | 412.34 | 461.31 | 0.72           | 0.44   | 0.12    | 17 |
| 4122255 | 4325.3 | -93.64    | 40.09    | 248.38 | 287.12 | 0.88           | 0.83   | 0.16    | 17 |
| 4123220 | 4333.1 | -85.89    | 37.27    | 568.80 | 603.66 | 0.80           | 0.71   | 0.06    | 17 |
| 6458406 | 4341   | 20.69     | 49.63    | 508.08 | 508.06 | 0.81           | 0.78   | 0.00    | 17 |
| 4113600 | 4351.2 | -93.55    | 48.40    | 208.98 | 221.81 | 0.45           | 0.39   | 0.06    | 17 |
| 4121145 | 4377.1 | -104.94   | 44.33    | 4.11   | 13.29  | 0.29           | -14.77 | 2.25    | 17 |
| 4213730 | 4400   | -97.67    | 53.79    | 170.83 | 180.32 | 0.49           | 0.35   | 0.06    | 17 |
| 4213101 | 4400   | -113.82   | 49.56    | 271.78 | 146.75 | 0.61           | -1.69  | -0.46   | 17 |
| 4244770 | 4400   | -54.85    | 49.01    | 914.57 | 723.70 | 0.63           | -1.17  | -0.21   | 17 |
| 4123205 | 4421.1 | -85.93    | 39.20    | 469.68 | 512.63 | 0.48           | 0.10   | 0.09    | 17 |
| 6233360 | 4446   | 16.44     | 57.15    | 221.81 | 236.07 | 0.57           | 0.34   | 0.06    | 17 |
| 4134700 | 4504   | -83.44    | 44.44    | 261.80 | 211.48 | 0.54           | -7.33  | -0.19   | 17 |
| 4125942 | 4529.9 | -90.54    | 36.40    | 401.55 | 512.72 | 0.68           | -0.20  | 0.28    | 17 |
| 4121125 | 4532.5 | -101.33   | 46.09    | 18.79  | 15.58  | 0.00           | -0.55  | -0.15   | 17 |
| 4122190 | 4558.4 | -94.70    | 39.69    | 226.76 | 274.15 | 0.83           | 0.73   | 0.21    | 17 |
| 4125200 | 4576.5 | -94.65    | 35.17    | 381.15 | 443.18 | 0.87           | 0.72   | 0.16    | 17 |
| 2421400 | 4578   | 49.51     | 36.62    | 119.34 | 122.59 | 0.00           | -1.10  | 0.03    | 17 |
| 4116471 | 4584.3 | -111.67   | 43.96    | 334.01 | 80.49  | 0.14           | -17.03 | -0.76   | 17 |
| 4120111 | 4584.3 | -106.76   | 45.14    | 72.15  | 18.03  | 0.64           | -2.12  | -0.75   | 17 |
| 4119445 | 4584.3 | -91.93    | 44.89    | 291.36 | 259.92 | 0.59           | -0.09  | -0.11   | 17 |
| 4115235 | 4589.5 | -119.99   | 48.08    | 297.24 | 108.94 | 0.46           | -4.07  | -0.63   | 17 |
| 4119312 | 4607.6 | -87.34    | 41.19    | 363.67 | 395.06 | 0.25           | -0.43  | 0.09    | 17 |
| 4113410 | 4636.1 | -103.08   | 48.98    | 12.25  | 25.37  | 0.09           | -0.51  | 1.18    | 17 |
| 4213935 | 4650   | -104.16   | 53.59    | 133.36 | 93.63  | 0.08           | -0.25  | -0.30   | 17 |
| 4133401 | 4662   | -88.08    | 45.88    | 286.16 | 332.18 | 0.52           | -0.37  | 0.16    | 17 |
| 6157100 | 4665   | 18.33     | 49.92    | 276.38 | 279.14 | 0.82           | 0.77   | 0.01    | 17 |
| 4119325 | 4672.4 | -89.74    | 40.14    | 292.32 | 381.34 | 0.69           | 0.25   | 0.30    | 17 |
| 4120220 | 4675   | -109.84   | 48.53    | 7.07   | 11.61  | 0.51           | 0.19   | 0.67    | 17 |
| 4214297 | 4730   | -108.04   | 55.41    | 86.63  | 104.38 | 0.05           | -1.21  | 0.20    | 17 |
| 3650630 | 4730   | -39.36    | -5.58    | 37.96  | 40.94  | 0.69           | 0.62   | 0.08    | 17 |
| 4150462 | 4804.5 | -99.74    | 30.51    | 31.32  | 67.34  | 0.51           | -7.18  | 1.15    | 17 |
| 4125080 | 4814.8 | -97.28    | 36.81    | 130.21 | 141.71 | 0.80           | 0.73   | 0.09    | 17 |
| 4152201 | 4827.8 | -108.54   | 33.06    | 27.54  | 10.57  | 0.34           | -1.08  | -0.62   | 17 |
| 4136500 | 4827.8 | -75.92    | 43.99    | 879.68 | 709.74 | 0.81           | -1.06  | -0.19   | 17 |

| GRDC_NO | AREA    | Longitude | Latitude | R_GRDC  | R_PwM   | R <sup>2</sup> | NSE     | raIBIAS | n  |
|---------|---------|-----------|----------|---------|---------|----------------|---------|---------|----|
| 4133501 | 4832.9  | -85.76    | 41.80    | 338.82  | 374.49  | 0.26           | -1.04   | 0.11    | 17 |
| 6854900 | 4833    | 21.84     | 63.14    | 285.79  | 290.07  | 0.79           | 0.78    | 0.02    | 17 |
| 4126352 | 4853.7  | -99.39    | 33.70    | 21.55   | 60.18   | 0.60           | -20.20  | 1.90    | 17 |
| 4208865 | 4860    | -110.86   | 55.84    | 142.32  | 107.30  | 0.08           | -0.51   | -0.25   | 17 |
| 4113330 | 4869.2  | -96.58    | 46.16    | 78.69   | 113.52  | 0.32           | -0.32   | 0.48    | 17 |
| 4125070 | 4869.2  | -96.99    | 37.22    | 217.00  | 229.91  | 0.91           | 0.90    | 0.06    | 17 |
| 4213880 | 4870    | -92.72    | 48.85    | 289.64  | 311.77  | 0.44           | 0.08    | 0.08    | 17 |
| 4147651 | 4902.9  | -75.19    | 39.97    | 591.61  | 569.85  | 0.91           | 0.89    | -0.04   | 17 |
| 6338110 | 4981    | 7.25      | 52.60    | 286.98  | 308.85  | 0.70           | -0.60   | 0.08    | 17 |
| 4127202 | 5024.6  | -89.09    | 38.96    | 316.51  | 394.10  | 0.53           | 0.13    | 0.25    | 17 |
| 3650881 | 5092    | -36.50    | -7.71    | 85.92   | 48.83   | 0.52           | -0.22   | 0.63    | 17 |
| 4208295 | 5100    | -129.55   | 60.21    | 350.08  | 274.91  | 0.24           | -1.30   | -0.21   | 17 |
| 4121102 | 5102.3  | -103.97   | 45.55    | 23.23   | 10.12   | 0.42           | 0.01    | -0.56   | 17 |
| 3649450 | 5140    | -51.40    | -16.42   | 476.75  | 420.72  | 0.19           | -0.78   | -0.12   | 17 |
| 6337511 | 5166    | 9.98      | 51.27    | 269.44  | 290.93  | 0.55           | -1.00   | 0.08    | 17 |
| 6545101 | 5176.79 | 15.09     | 46.12    | 1015.13 | 935.08  | 0.89           | 0.79    | -0.08   | 17 |
| 6172050 | 5180    | 24.77     | 58.46    | 315.40  | 319.83  | 0.41           | -0.02   | 0.01    | 17 |
| 4120300 | 5205.9  | -110.51   | 47.93    | 8.89    | 5.17    | 0.09           | -0.08   | -0.31   | 17 |
| 4125565 | 5226.6  | -96.07    | 35.68    | 130.87  | 147.48  | 0.73           | 0.68    | 0.13    | 17 |
| 4125910 | 5278.4  | -90.85    | 36.63    | 488.49  | 461.31  | 0.66           | 0.52    | -0.06   | 17 |
| 6337509 | 5304    | 9.68      | 52.39    | 286.89  | 297.06  | 0.68           | 0.47    | 0.04    | 17 |
| 2421800 | 5310    | 55.16     | 37.26    | 29.10   | 23.30   | 0.10           | -0.09   | -0.20   | 17 |
| 4113360 | 5361.3  | -98.71    | 47.81    | 31.33   | 54.25   | 0.16           | -2.14   | 0.73    | 17 |
| 4213056 | 5370    | -112.67   | 50.14    | 12.62   | 17.02   | 0.37           | -5.67   | 0.35    | 17 |
| 4119430 | 5387.2  | -91.29    | 44.06    | 304.70  | 251.30  | 0.78           | 0.32    | -0.18   | 17 |
| 4113310 | 5387.2  | -96.79    | 46.47    | 58.96   | 96.12   | 0.18           | -0.70   | 0.63    | 17 |
| 4214400 | 5390    | -91.59    | 51.17    | 319.64  | 327.18  | 0.60           | 0.60    | 0.02    | 17 |
| 4126351 | 5402.7  | -99.14    | 33.76    | 11.17   | 66.16   | 0.12           | -175.02 | 4.92    | 17 |
| 4119315 | 5415.7  | -87.82    | 41.01    | 354.58  | 406.99  | 0.48           | 0.23    | 0.15    | 17 |
| 4126750 | 5444.2  | -92.03    | 33.70    | 436.01  | 500.92  | 0.83           | 0.73    | 0.15    | 17 |
| 4150331 | 5472.7  | -98.06    | 28.95    | 106.74  | 140.15  | 0.77           | 0.00    | 0.31    | 17 |
| 6337513 | 5487    | 9.71      | 51.41    | 271.54  | 277.80  | 0.57           | -0.77   | 0.02    | 17 |
| 1197300 | 5499    | 30.97     | -26.03   | 65.25   | 95.90   | 0.65           | 0.04    | 0.47    | 17 |
| 4125100 | 5563.3  | -99.34    | 38.20    | 10.85   | 16.60   | 0.08           | -38.10  | 4.92    | 17 |
| 4208890 | 5570    | -111.69   | 57.21    | 84.23   | 94.12   | 0.06           | -0.42   | 0.12    | 17 |
| 4215050 | 5590    | -120.15   | 49.38    | 261.03  | 280.62  | 0.46           | 0.31    | 0.08    | 17 |
| 4148110 | 5654    | -77.53    | 35.89    | 306.31  | 367.37  | 0.60           | 0.18    | 0.20    | 17 |
| 4213375 | 5660    | -115.36   | 52.91    | 278.65  | 233.59  | 0.36           | -0.13   | -0.16   | 17 |
| 4115310 | 5698    | -118.76   | 48.98    | 239.25  | 164.32  | 0.31           | -1.75   | -0.31   | 17 |
| 4123277 | 5703.2  | -80.74    | 36.94    | 474.26  | 483.80  | 0.66           | 0.63    | 0.02    | 17 |
| 4147701 | 5780.9  | -75.80    | 42.04    | 623.24  | 612.73  | 0.86           | 0.85    | -0.02   | 17 |
| 6243030 | 5792    | 11.40     | 47.28    | 913.62  | 636.21  | 0.53           | -6.55   | -0.30   | 17 |
| 4115080 | 5796.4  | -122.91   | 46.28    | 1413.23 | 1117.80 | 0.34           | -1.23   | -0.21   | 17 |
| 4121110 | 5801.6  | -101.62   | 47.29    | 27.23   | 26.75   | 0.41           | 0.31    | -0.02   | 17 |
| 4214275 | 5810    | -95.77    | 56.94    | 223.04  | 187.11  | 0.73           | 0.45    | -0.16   | 17 |
| 4122250 | 5827.5  | -93.94    | 39.93    | 220.60  | 288.28  | 0.83           | 0.65    | 0.31    | 17 |

| GRDC_NO | AREA   | Longitude | Latitude | R_GRDC  | R_PwM   | R <sup>2</sup> | NSE    | raIBIAS | n  |
|---------|--------|-----------|----------|---------|---------|----------------|--------|---------|----|
| 4133260 | 5853.4 | -88.74    | 44.40    | 262.68  | 324.59  | 0.47           | -1.35  | 0.24    | 17 |
| 1160850 | 5887   | 30.38     | -28.06   | 82.64   | 59.37   | 0.81           | 0.65   | -0.28   | 17 |
| 4126300 | 5887.1 | -95.75    | 34.03    | 238.04  | 237.37  | 0.78           | 0.77   | 0.00    | 17 |
| 4148321 | 5905   | -80.39    | 35.86    | 394.18  | 463.73  | 0.68           | 0.17   | 0.18    | 17 |
| 4213057 | 5920   | -112.51   | 49.90    | 18.37   | 17.02   | 0.38           | -2.88  | -0.07   | 17 |
| 4207321 | 5930   | -121.57   | 52.61    | 698.70  | 416.75  | 0.60           | -6.90  | -0.40   | 17 |
| 4115240 | 5931.1 | -119.33   | 45.90    | 77.26   | 24.88   | 0.15           | -3.17  | -0.68   | 17 |
| 4119311 | 5941.5 | -87.67    | 41.16    | 370.90  | 395.06  | 0.24           | -0.24  | 0.07    | 17 |
| 3669630 | 5945   | -55.78    | -29.78   | 621.52  | 700.73  | 0.89           | 0.81   | 0.13    | 17 |
| 4121311 | 5962.2 | -96.92    | 42.82    | 51.22   | 108.00  | 0.52           | -1.11  | 1.11    | 17 |
| 2421200 | 5983   | 47.85     | 35.67    | 11.56   | 38.46   | 0.46           | -25.83 | 2.59    | 17 |
| 4208916 | 5990   | -111.20   | 57.65    | 181.90  | 90.15   | 0.41           | -3.82  | -0.50   | 17 |
| 4133700 | 5990.7 | -85.66    | 43.44    | 310.10  | 221.52  | 0.44           | -3.99  | -0.29   | 17 |
| 4135205 | 6003.6 | -84.40    | 41.24    | 371.14  | 408.87  | 0.80           | 0.71   | 0.10    | 17 |
| 4122639 | 6008.8 | -98.74    | 41.04    | 29.21   | 57.02   | 0.77           | -40.05 | 0.95    | 17 |
| 4119170 | 6050.2 | -90.54    | 41.77    | 339.94  | 381.68  | 0.82           | 0.73   | 0.12    | 17 |
| 4122155 | 6055.4 | -106.51   | 42.01    | 22.93   | 10.28   | 0.37           | -0.44  | -0.55   | 17 |
| 4120125 | 6086.5 | -108.43   | 44.84    | 115.58  | 13.02   | 0.32           | -2.62  | -0.89   | 17 |
| 4122636 | 6086.5 | -99.39    | 41.78    | 81.85   | 78.50   | 0.25           | -5.57  | -0.04   | 17 |
| 4215103 | 6090   | -119.61   | 49.50    | 76.82   | 102.87  | 0.13           | -0.98  | 0.34    | 17 |
| 6935500 | 6119   | 9.64      | 47.38    | 1182.27 | 1022.41 | 0.63           | -0.22  | -0.14   | 17 |
| 4213810 | 6130   | -97.36    | 56.00    | 186.25  | 234.41  | 0.81           | 0.44   | 0.26    | 17 |
| 6340600 | 6171   | 12.58     | 51.59    | 330.79  | 299.98  | 0.59           | 0.41   | -0.09   | 17 |
| 6246612 | 6214   | 15.28     | 47.41    | 564.34  | 587.54  | 0.64           | 0.53   | 0.04    | 17 |
| 4134300 | 6216   | -84.23    | 43.60    | 278.89  | 228.71  | 0.29           | -0.57  | -0.18   | 17 |
| 6337507 | 6366   | 9.47      | 51.23    | 267.87  | 289.84  | 0.77           | -0.39  | 0.08    | 17 |
| 4150605 | 6368.8 | -96.94    | 32.97    | 128.00  | 148.17  | 0.53           | 0.43   | 0.16    | 17 |
| 4203410 | 6370   | -136.29   | 62.06    | 78.86   | 51.35   | 0.42           | -0.54  | -0.35   | 17 |
| 4119290 | 6423.2 | -91.41    | 39.61    | 292.36  | 380.33  | 0.80           | 0.57   | 0.30    | 17 |
| 4116200 | 6475   | -118.14   | 46.76    | 71.03   | 62.38   | 0.12           | -0.22  | -0.12   | 17 |
| 4121340 | 6475   | -95.79    | 42.47    | 190.22  | 171.35  | 0.55           | 0.52   | -0.10   | 17 |
| 4220500 | 6490   | -110.47   | 48.99    | 69.48   | 23.79   | 0.73           | -6.70  | -0.65   | 17 |
| 4147715 | 6490.5 | -76.63    | 42.01    | 385.37  | 421.62  | 0.87           | 0.80   | 0.09    | 17 |
| 4148535 | 6526.8 | -81.09    | 34.01    | 261.17  | 348.99  | 0.71           | 0.07   | 0.34    | 17 |
| 4115223 | 6526.8 | -119.43   | 44.81    | 163.15  | 65.97   | 0.30           | -2.48  | -0.60   | 17 |
| 4123095 | 6622.6 | -87.74    | 35.93    | 502.08  | 602.73  | 0.82           | 0.31   | 0.20    | 17 |
| 4118110 | 6734   | -119.10   | 39.15    | 11.93   | 3.64    | 0.05           | -0.25  | -0.69   | 17 |
| 6246611 | 6791.5 | 15.32     | 47.16    | 544.71  | 476.97  | 0.80           | 0.23   | -0.12   | 17 |
| 4116350 | 6811.7 | -115.72   | 42.77    | 38.80   | 11.57   | 0.37           | -1.49  | -0.70   | 17 |
| 4119070 | 6837.6 | -93.74    | 45.09    | 166.31  | 161.09  | 0.25           | 0.16   | -0.03   | 17 |
| 4119317 | 6843.4 | -88.79    | 41.39    | 317.07  | 378.86  | 0.69           | 0.31   | 0.19    | 17 |
| 4215102 | 6860   | -119.58   | 49.34    | 73.58   | 102.87  | 0.13           | -1.48  | 0.40    | 17 |
| 4148610 | 6863.5 | -81.41    | 32.19    | 205.08  | 298.67  | 0.62           | -0.28  | 0.46    | 17 |
| 4121130 | 6889.4 | -102.16   | 45.20    | 20.54   | 15.71   | 0.06           | 0.00   | -0.22   | 17 |
| 4126100 | 6894.6 | -94.39    | 33.92    | 494.06  | 497.04  | 0.82           | 0.78   | 0.01    | 17 |
| 1160320 | 6903   | 19.54     | -32.50   | 33.72   | 5.67    | 0.78           | -1.35  | -0.81   | 17 |

| GRDC_NO | AREA   | Longitude | Latitude | R_GRDC | R_PwM  | R <sup>2</sup> | NSE    | raIBIAS | n  |
|---------|--------|-----------|----------|--------|--------|----------------|--------|---------|----|
| 4116401 | 6941.2 | -116.44   | 43.93    | 307.20 | 70.42  | 0.37           | -5.66  | -0.77   | 17 |
| 4148121 | 6972.3 | -77.59    | 35.26    | 324.48 | 391.65 | 0.68           | 0.17   | 0.21    | 17 |
| 6336900 | 6983   | 6.64      | 49.41    | 311.53 | 358.29 | 0.80           | 0.23   | 0.15    | 17 |
| 2423350 | 6994   | 48.89     | 33.22    | 138.37 | 27.61  | 0.68           | -4.03  | -0.80   | 17 |
| 1259110 | 7000   | 18.22     | -26.80   | 43.65  | 2.54   | 0.04           | -0.96  | -0.84   | 17 |
| 4115282 | 7006   | -121.32   | 44.50    | 111.94 | 87.38  | 0.01           | -6.93  | -0.22   | 17 |
| 4147050 | 7031.9 | -69.89    | 45.05    | 632.55 | 625.86 | 0.79           | 0.75   | -0.01   | 17 |
| 4127201 | 7042.2 | -89.36    | 38.61    | 319.19 | 397.60 | 0.47           | 0.04   | 0.25    | 17 |
| 4148570 | 7070.7 | -80.39    | 33.03    | 223.56 | 245.08 | 0.61           | 0.34   | 0.10    | 17 |
| 4152900 | 7163.9 | -109.29   | 33.05    | 19.86  | 16.18  | 0.04           | -0.24  | -0.19   | 17 |
| 4148310 | 7226.1 | -79.25    | 34.06    | 288.63 | 316.52 | 0.45           | 0.26   | 0.10    | 17 |
| 4116460 | 7252   | -116.28   | 43.66    | 111.44 | 31.10  | 0.08           | -1.62  | -0.72   | 17 |
| 4122160 | 7267.5 | -95.63    | 40.63    | 232.83 | 246.21 | 0.74           | 0.73   | 0.06    | 17 |
| 4147501 | 7277.9 | -73.60    | 43.27    | 707.99 | 607.93 | 0.82           | 0.20   | -0.14   | 17 |
| 4207810 | 7280   | -121.23   | 50.34    | 104.37 | 99.43  | 0.13           | 0.03   | -0.05   | 17 |
| 4127700 | 7283.1 | -90.70    | 32.35    | 474.48 | 604.71 | 0.83           | 0.08   | 0.27    | 17 |
| 4115450 | 7288.3 | -114.06   | 46.84    | 265.13 | 52.19  | 0.33           | -10.26 | -0.80   | 17 |
| 4122230 | 7303.8 | -97.87    | 39.01    | 12.98  | 19.23  | 0.06           | -0.87  | 0.48    | 17 |
| 4121304 | 7303.8 | -98.68    | 46.89    | 30.72  | 53.19  | 0.08           | -0.49  | 0.73    | 17 |
| 4152200 | 7327.1 | -108.68   | 32.73    | 23.08  | 10.57  | 0.31           | -0.64  | -0.54   | 17 |
| 4116335 | 7329.7 | -114.60   | 45.29    | 123.67 | 72.34  | 0.37           | -3.00  | -0.42   | 17 |
| 4122280 | 7355.6 | -91.98    | 37.94    | 311.06 | 394.30 | 0.84           | 0.51   | 0.27    | 17 |
| 4125552 | 7381.5 | -104.49   | 36.30    | 3.09   | 9.37   | 0.05           | -11.96 | 2.12    | 17 |
| 4146115 | 7389.3 | -123.67   | 41.05    | 542.23 | 271.57 | 0.52           | -1.30  | -0.50   | 17 |
| 4208397 | 7400   | -121.46   | 58.27    | 113.12 | 147.54 | 0.55           | -0.58  | 0.30    | 17 |
| 3652210 | 7440   | -41.13    | -14.61   | 14.78  | 49.60  | 0.20           | -11.67 | 2.44    | 17 |
| 4116470 | 7562.8 | -111.90   | 43.83    | 225.73 | 78.16  | 0.22           | -7.50  | -0.65   | 17 |
| 4215101 | 7590   | -119.57   | 49.12    | 71.28  | 107.59 | 0.21           | -1.81  | 0.51    | 17 |
| 4147726 | 7705.3 | -77.75    | 41.32    | 562.57 | 521.21 | 0.89           | 0.83   | -0.07   | 17 |
| 4122370 | 7744.1 | -100.88   | 40.24    | 4.02   | 11.06  | 0.00           | -50.66 | 1.87    | 17 |
| 4146140 | 7770   | -121.88   | 42.56    | 95.26  | 36.31  | 0.00           | -8.59  | -0.62   | 17 |
| 4203210 | 7800   | -139.41   | 64.04    | 296.00 | 153.18 | 0.13           | -8.88  | -0.48   | 17 |
| 4213041 | 7860   | -114.06   | 51.05    | 346.33 | 152.02 | 0.62           | -9.16  | -0.56   | 17 |
| 4150465 | 7889.1 | -98.72    | 31.21    | 14.71  | 66.62  | 0.73           | -67.17 | 3.53    | 17 |
| 4148546 | 7899.5 | -80.97    | 34.99    | 346.22 | 430.25 | 0.72           | 0.24   | 0.24    | 17 |
| 6335601 | 7916   | 9.16      | 49.07    | 338.53 | 427.48 | 0.73           | -1.48  | 0.26    | 17 |
| 4214470 | 7950   | -87.94    | 53.71    | 306.72 | 218.66 | 0.48           | -0.26  | -0.29   | 17 |
| 4147381 | 8008.3 | -71.47    | 42.95    | 670.59 | 581.31 | 0.95           | 0.73   | -0.13   | 17 |
| 4152570 | 8029   | -109.69   | 41.54    | 21.35  | 11.56  | 0.34           | 0.06   | -0.46   | 17 |
| 4123111 | 8034.2 | -88.16    | 38.06    | 393.99 | 478.50 | 0.74           | 0.22   | 0.21    | 17 |
| 4121150 | 8047.1 | -100.38   | 44.32    | 18.21  | 10.94  | 0.06           | -0.04  | -0.34   | 17 |
| 4146180 | 8062.7 | -124.10   | 40.49    | 737.57 | 454.98 | 0.82           | -0.03  | -0.38   | 17 |
| 4147902 | 8104.1 | -78.46    | 39.54    | 371.13 | 427.08 | 0.90           | 0.70   | 0.15    | 17 |
| 6457840 | 8140   | 18.74     | 51.61    | 169.22 | 178.96 | 0.64           | -0.92  | 0.06    | 17 |
| 4151650 | 8143   | -106.11   | 36.07    | 49.25  | 18.54  | 0.00           | -5.36  | -0.62   | 17 |
| 4120100 | 8220.7 | -105.17   | 48.17    | 11.21  | 16.28  | 0.35           | -0.23  | 0.45    | 17 |

| GRDC_NO | AREA   | Longitude | Latitude | R_GRDC  | R_PwM  | R <sup>2</sup> | NSE      | raIBIAS | n  |
|---------|--------|-----------|----------|---------|--------|----------------|----------|---------|----|
| 4122281 | 8236.2 | -91.82    | 38.39    | 322.03  | 394.90 | 0.53           | 0.24     | 0.23    | 17 |
| 3651400 | 8250   | -46.57    | -17.50   | 362.93  | 401.25 | 0.52           | 0.14     | 0.11    | 17 |
| 4215100 | 8280   | -119.42   | 48.94    | 63.46   | 102.87 | 0.18           | -2.46    | 0.62    | 17 |
| 4122271 | 8365.7 | -94.68    | 38.23    | 206.39  | 302.35 | 0.78           | 0.23     | 0.46    | 17 |
| 6338100 | 8369   | 7.23      | 52.74    | 293.60  | 329.50 | 0.71           | -0.56    | 0.12    | 17 |
| 4116400 | 8391.6 | -116.92   | 44.05    | 258.42  | 70.42  | 0.40           | -4.71    | -0.73   | 17 |
| 4150461 | 8409.7 | -99.11    | 30.66    | 25.75   | 60.92  | 0.52           | -8.39    | 1.37    | 17 |
| 4147110 | 8451.2 | -70.21    | 44.07    | 734.09  | 668.08 | 0.84           | 0.65     | -0.09   | 17 |
| 6342925 | 8467   | 12.70     | 48.68    | 628.36  | 518.58 | 0.62           | -1.17    | -0.17   | 17 |
| 4119251 | 8471.9 | -91.54    | 41.66    | 296.67  | 277.04 | 0.90           | 0.82     | -0.07   | 17 |
| 4123250 | 8547   | -84.31    | 38.71    | 460.12  | 596.96 | 0.68           | -0.37    | 0.30    | 17 |
| 4208225 | 8560   | -125.40   | 61.53    | 374.19  | 253.05 | 0.11           | -4.83    | -0.32   | 17 |
| 4121430 | 8572.9 | -100.97   | 46.84    | 29.39   | 22.52  | 0.13           | 0.05     | -0.23   | 17 |
| 4122211 | 8609.2 | -96.86    | 39.78    | 52.65   | 90.21  | 0.81           | -2.48    | 0.71    | 17 |
| 4119201 | 8650.6 | -89.07    | 42.61    | 287.34  | 380.71 | 0.72           | -0.30    | 0.32    | 17 |
| 4147720 | 8686.9 | -77.13    | 40.48    | 434.81  | 458.46 | 0.90           | 0.88     | 0.05    | 17 |
| 4152700 | 8831.9 | -108.03   | 40.51    | 145.07  | 43.30  | 0.35           | -2.67    | -0.70   | 17 |
| 4115102 | 8857.8 | -123.17   | 44.27    | 1069.12 | 806.32 | 0.50           | -0.81    | -0.25   | 17 |
| 4214310 | 8880   | -95.12    | 54.86    | 177.11  | 174.27 | 0.21           | -0.08    | -0.02   | 17 |
| 4132200 | 8883.7 | -92.42    | 46.70    | 223.44  | 224.66 | 0.52           | 0.46     | 0.01    | 17 |
| 4126350 | 8907   | -98.30    | 34.06    | 22.04   | 70.70  | 0.61           | -17.97   | 2.21    | 17 |
| 4119285 | 8912.2 | -93.95    | 41.54    | 232.14  | 207.75 | 0.77           | 0.69     | -0.11   | 17 |
| 4115261 | 9010.6 | -120.47   | 46.54    | 344.40  | 166.19 | 0.16           | -4.89    | -0.52   | 17 |
| 4147601 | 9013.2 | -74.79    | 41.31    | 636.96  | 639.29 | 0.87           | 0.87     | 0.00    | 17 |
| 4126851 | 9033.9 | -99.29    | 34.17    | 9.13    | 22.85  | 0.47           | -7.07    | 1.69    | 17 |
| 4213355 | 9090   | -96.61    | 51.71    | 244.41  | 247.37 | 0.50           | 0.49     | 0.01    | 17 |
| 4208947 | 9100   | -115.84   | 54.01    | 195.38  | 176.76 | 0.21           | -0.15    | -0.10   | 17 |
| 4121341 | 9132.3 | -95.99    | 41.97    | 186.75  | 200.52 | 0.47           | 0.43     | 0.07    | 17 |
| 6142120 | 9146   | 17.31     | 48.94    | 189.24  | 212.35 | 0.78           | 0.38     | 0.12    | 17 |
| 4148545 | 9168.6 | -80.88    | 34.84    | 368.16  | 409.44 | 0.72           | 0.54     | 0.11    | 17 |
| 4115305 | 9194.5 | -119.62   | 48.99    | 210.13  | 193.46 | 0.46           | 0.26     | -0.08   | 17 |
| 4122221 | 9207.5 | -100.86   | 38.79    | 0.26    | 10.08  | 0.11           | -3217.29 | 48.72   | 17 |
| 4208335 | 9270   | -119.82   | 61.16    | 176.41  | 108.16 | 0.61           | -0.61    | -0.39   | 17 |
| 4208561 | 9350   | -121.62   | 56.25    | 220.38  | 198.30 | 0.60           | 0.47     | -0.10   | 17 |
| 4123230 | 9401.7 | -84.57    | 39.39    | 423.62  | 471.27 | 0.64           | 0.43     | 0.11    | 17 |
| 4133500 | 9494.9 | -86.26    | 41.84    | 352.43  | 343.50 | 0.33           | -0.31    | -0.03   | 17 |
| 4152580 | 9660.7 | -108.42   | 40.55    | 46.39   | 9.12   | 0.36           | -1.65    | -0.80   | 17 |
| 6340611 | 9707   | 13.41     | 52.51    | 84.44   | 174.23 | 0.26           | -8.20    | 1.06    | 17 |
| 4215660 | 9710   | -117.19   | 51.49    | 529.10  | 276.94 | 0.72           | -12.77   | -0.48   | 17 |
| 4127100 | 9810.9 | -90.59    | 38.51    | 309.93  | 412.38 | 0.76           | 0.07     | 0.33    | 17 |
| 4215180 | 9840   | -118.21   | 48.99    | 261.88  | 141.12 | 0.39           | -3.99    | -0.46   | 17 |
| 4115311 | 9842   | -118.21   | 48.98    | 261.83  | 110.05 | 0.46           | -6.46    | -0.58   | 17 |
| 4208835 | 9860   | -113.06   | 58.33    | 109.21  | 87.46  | 0.11           | -0.18    | -0.20   | 17 |
| 4125025 | 9888.6 | -95.44    | 37.90    | 163.12  | 167.39 | 0.85           | 0.84     | 0.03    | 17 |
| 4115403 | 9945.6 | -116.98   | 47.70    | 530.16  | 251.31 | 0.32           | -3.69    | -0.53   | 17 |
